# Supplementary material
Source: publisher figshare collection journal article supplement (https://gsajournals.figshare.com/ndownloader/files/27772137)
Supplement: Supplementary file 1 [file 27772137]

## Sheet: Sheet1
Data S2. Significantly differentially expressed genes of sh4 endosperm compared with WT endosperm at 15 DAP
gene	locus	Description	WT	sh4	log2(fold_change)	test_stat	p_value	q_value
Zm00001d048852	4:6358441-6359146	Zein-alpha A30	1187.58	2.87058	-8.69246	-14.9232	5e-05	0.00031057
Zm00001d030855	1:163526101-163526827	Zein-alpha 19D1	10041.2	25.4226	-8.62561	-14.4049	5e-05	0.00031057
Zm00001d048847	4:6292791-6293595	Zein-alpha Z4	4363.99	19.082	-7.83729	-13.927	5e-05	0.00031057
Zm00001d049243	4:22579360-22580152	22 kDa alpha-zein 16	38358.3	189.747	-7.65932	-11.5957	5e-05	0.00031057
Zm00001d049476	4:31588159-31589091	Zein-alpha 19A2 (Fragment)	4762.39	26.1024	-7.51136	-10.636	5e-05	0.00031057
Zm00001d037436	6:125302097-125302733	.	2462.81	13.6431	-7.49599	-14.5001	5e-05	0.00031057
Zm00001d045937	9:47916397-47916850	.	118858	693.518	-7.4211	-11.0552	5e-05	0.00031057
Zm00001d019160	7:19593330-19594177	#N/A	326.964	2.37891	-7.10269	-7.81825	5e-05	0.00031057
Zm00001d048848	4:6333302-6334007	Zein-alpha 19B1	7197.51	57.0174	-6.97995	-11.7966	5e-05	0.00031057
Zm00001d048850	4:6349539-6350244	Zein-alpha A30	2779.75	23.7132	-6.87312	-13.5844	5e-05	0.00031057
Zm00001d019155	7:19534999-19549755	Zein-alpha A20	9783.6	117.653	-6.37776	-11.5977	5e-05	0.00031057
Zm00001d048818	4:5943969-5944767	#N/A	485.585	6.66764	-6.1864	-11.9935	5e-05	0.00031057
Zm00001d020591	7:123954262-123955189	50 kDa gamma-zein	20402.3	339.427	-5.90949	-6.60988	5e-05	0.00031057
Zm00001d048816	4:5927152-5927953	#N/A	4234.58	72.6328	-5.86545	-12.4684	5e-05	0.00031057
Zm00001d048849	4:6345100-6345805	Zein-alpha A30	5963.28	106.084	-5.81283	-8.89298	5e-05	0.00031057
Zm00001d048851	4:6353979-6354684	Zein-alpha A30	2482.85	44.2263	-5.81095	-12.4066	5e-05	0.00031057
Zm00001d048810	4:5880092-5880632	#N/A	607.103	11.0705	-5.77715	-10.149	5e-05	0.00031057
Zm00001d048808	4:5850647-5851046	Protein FLOURY 2	1890.67	39.2822	-5.58888	-10.4579	5e-05	0.00031057
Zm00001d048812	4:5897750-5898554	22 kDa alpha-zein 8	11680	249.706	-5.54767	-9.55058	5e-05	0.00031057
Zm00001d048809	4:5874885-5875686	22 kDa alpha-zein 4	12346.7	275.457	-5.48615	-9.62815	5e-05	0.00031057
Zm00001d048813	4:5909077-5909878	22 kDa alpha-zein 8	4611.45	103.869	-5.47239	-11.6357	5e-05	0.00031057
Zm00001d035680	6:40863631-40864319	Subtilisin-chymotrypsin inhibitor-2A	3335.39	82.2166	-5.34228	-13.5433	5e-05	0.00031057
Zm00001d048817	4:5939852-5940653	22 kDa alpha-zein 14	1267.68	34.7445	-5.18926	-12.6468	5e-05	0.00031057
Zm00001d011012	8:136696727-136698348	Salt stress-induced protein	1339.27	55.065	-4.60416	-12.2297	5e-05	0.00031057
Zm00001d037205	6:115761947-115762958	Protein EXORDIUM	107.121	4.6846	-4.51517	-7.44119	5e-05	0.00031057
Zm00001d024753	10:86312504-86313524	Peroxidase 5	143.137	6.82862	-4.38966	-8.02434	5e-05	0.00031057
Zm00001d026369	10:144444246-144447064	Anthocyanidin reductase ((2S)-flavan-3-ol-forming)	19.9782	1.08711	-4.19986	-5.04382	5e-05	0.00031057
Zm00001d009123	8:37790209-37794148	Rab9 effector protein with kelch motifs	18.8138	1.05215	-4.16037	-6.53842	5e-05	0.00031057
Zm00001d005793	2:188849022-188849574	16 kDa gamma-zein	59790.7	3384.09	-4.14308	-6.92898	5e-05	0.00031057
Zm00001d054074	4:245954814-245955390	#N/A	20.8887	1.27223	-4.0373	-3.36284	0.00035	0.00174885
Zm00001d048479	9:156995450-156996912	Nascent polypeptide-associated complex subunit alpha-like protein 2	23.5052	1.45062	-4.01824	-5.56075	5e-05	0.00031057
Zm00001d013956	5:26132023-26133292	Aquaporin TIP3-1	1129.28	77.3669	-3.86754	-10.9686	5e-05	0.00031057
Zm00001d035560	6:33142627-33144237	Salt stress-induced protein	137.585	9.63816	-3.83542	-8.6559	5e-05	0.00031057
Zm00001d040113	3:28018443-28020104	Protein MOTHER of FT and TFL1 homolog 2	90.1872	6.35774	-3.82634	-6.94504	5e-05	0.00031057
Zm00001d035760	6:46129119-46129656	Zein-beta	110980	7901.23	-3.81208	-3.67877	5e-05	0.00031057
Zm00001d040807	3:67151873-67157763	CASP-like protein 1E1	15.8026	1.13577	-3.79842	-3.57661	5e-05	0.00031057
Zm00001d026690	10:150050329-150051860	Serine/threonine-protein kinase SAPK5	74.2721	5.4502	-3.76844	-8.11589	5e-05	0.00031057
Zm00001d025872	10:132198540-132199083	.	219.793	16.3742	-3.74665	-6.95596	5e-05	0.00031057
Zm00001d027500	1:6797798-6798604	Defensin-like protein	11574.6	876.092	-3.72374	-8.26444	5e-05	0.00031057
Zm00001d021901	7:165699753-165700437	Zeamatin	145.749	11.2341	-3.69753	-6.87561	5e-05	0.00031057
Zm00001d038794	6:164493062-164495421	Probable pectinesterase 53	16.3993	1.2944	-3.66328	-3.56245	5e-05	0.00031057
Zm00001d011431	8:150346179-150347905	PLASMODESMATA CALLOSE-BINDING PROTEIN 3	13.2088	1.18974	-3.47278	-4.5557	5e-05	0.00031057
Zm00001d027534	1:7564458-7568986	Probable acyl-activating enzyme 1, peroxisomal	11.4296	1.03056	-3.47127	-3.15288	0.0003	0.0015276
Zm00001d049508	4:32709923-32711883	Mediator of RNA polymerase II transcription subunit 36a	63.4349	5.73726	-3.46684	-6.50155	5e-05	0.00031057
Zm00001d014762	5:61966309-61967872	Protein SHORT INTERNODES	17.3806	1.5752	-3.46388	-4.75118	5e-05	0.00031057
Zm00001d037915	6:141874631-141875420	.	47.5039	4.32823	-3.4562	-4.68683	5e-05	0.00031057
Zm00001d033038	1:248252381-248253147	Stress enhanced protein 1, chloroplastic	22.7903	2.10697	-3.43518	-4.03933	5e-05	0.00031057
Zm00001d033187	1:253272957-253275838	Glycerophosphodiester phosphodiesterase GDPD6	71.1891	6.65213	-3.41977	-7.6689	5e-05	0.00031057
Zm00001d035681	6:40865497-40868507	Subtilisin-chymotrypsin inhibitor-2A	5246.24	503.267	-3.38189	-8.90449	5e-05	0.00031057
Zm00001d003009	2:29360437-29360992	.	25.3123	2.43626	-3.3771	-3.64708	5e-05	0.00031057
Zm00001d000181	B73V4_ctg181:248689-250107	#N/A	17.577	1.71584	-3.3567	-3.83446	5e-05	0.00031057
Zm00001d015491	5:93191093-93191763	Heptahelical transmembrane protein ADIPOR2	13.8304	1.35214	-3.35452	-3.09583	0.0005	0.00237556
Zm00001d009646	8:74205127-74206555	DELLA protein RGA1	295.852	29.174	-3.34212	-9.3209	5e-05	0.00031057
Zm00001d010371	8:111651372-111652278	Ribosome-inactivating protein	2853.38	287.913	-3.30897	-6.12176	5e-05	0.00031057
Zm00001d015200	5:78979000-78987766	Protein PTST, chloroplastic	172.934	17.5951	-3.29698	-9.07324	5e-05	0.00031057
Zm00001d007299	2:227230997-227231495	Probable non-specific lipid-transfer protein 2	519.024	53.749	-3.27149	-7.14868	5e-05	0.00031057
Zm00001d027861	1:15582762-15585986	Alanine--glyoxylate aminotransferase 2 homolog 1, mitochondrial	332.276	34.8227	-3.25428	-9.36076	5e-05	0.00031057
Zm00001d036775	6:100470263-100476233	Protein STRUBBELIG-RECEPTOR FAMILY 8	11.0645	1.16006	-3.25367	-6.02483	5e-05	0.00031057
Zm00001d026321	10:143570398-143571745	F-box/kelch-repeat protein At5g60570	9.63544	1.01198	-3.25118	-4.83099	5e-05	0.00031057
Zm00001d014888	5:67030218-67031109	.	95.2275	10.0622	-3.24243	-6.69542	5e-05	0.00031057
Zm00001d004208	2:91679513-91679914	E3 ubiquitin-protein ligase RHA2B	33.1778	3.57455	-3.21438	-3.03967	0.00085	0.00371002
Zm00001d016938	5:180472916-180476181	Sucrose transport protein SUT5	28.3135	3.09375	-3.19406	-5.87274	5e-05	0.00031057
Zm00001d016144	5:146540229-146555384	Fatty-acid-binding protein 3, chloroplastic	11.4692	1.29304	-3.14892	-3.66082	5e-05	0.00031057
Zm00001d014520	5:51450352-51451022	#N/A	204.269	23.1143	-3.14361	-6.51528	5e-05	0.00031057
Zm00001d011080	8:138416662-138416884	Subtilisin-chymotrypsin inhibitor-2A	6355.89	719.728	-3.14257	-5.42775	5e-05	0.00031057
Zm00001d016298	5:156109005-156112456	Homeobox protein ATH1	9.24811	1.05168	-3.13647	-4.20335	5e-05	0.00031057
Zm00001d048615	4:1368531-1369329	.	20.1565	2.31746	-3.12063	-4.03824	5e-05	0.00031057
Zm00001d027874	1:16038733-16042002	Nuclear transcription factor Y subunit A-3	104.748	12.1447	-3.10853	-7.64694	5e-05	0.00031057
Zm00001d031434	1:190080838-190081984	DNA-damage-repair/toleration protein DRT100	25.5922	2.98676	-3.09905	-4.19168	5e-05	0.00031057
Zm00001d025862	10:131802311-131805026	Probable low-specificity L-threonine aldolase 1	36.1884	4.31847	-3.06694	-6.43354	5e-05	0.00031057
Zm00001d051749	4:168776068-168778157	Homeobox-leucine zipper protein HOX16	17.2155	2.06413	-3.0601	-3.91476	5e-05	0.00031057
Zm00001d009494	8:67185375-67188550	Protein DETOXIFICATION 10	10.9341	1.31153	-3.05951	-4.93894	5e-05	0.00031057
Zm00001d047503	9:132776877-132779320	Dormancy-associated protein homolog 3	52.3422	6.30365	-3.05371	-6.09062	5e-05	0.00031057
Zm00001d010321	8:109459049-109469711	Pyruvate, phosphate dikinase 2	4471.4	541.312	-3.04619	-5.04569	5e-05	0.00031057
Zm00001d018917	7:9356137-9356785	#N/A	8.87363	1.07652	-3.04314	-2.56492	0.0021	0.00793527
Zm00001d052333	4:187330813-187332060	.	476.644	57.8311	-3.043	-8.57222	5e-05	0.00031057
Zm00001d025103	10:104219160-104224390	Primary amine oxidase	31.8865	3.89782	-3.03221	-5.7776	5e-05	0.00031057
Zm00001d020434	7:114139354-114140955	NAD(P)H-quinone oxidoreductase subunit L, chloroplastic	14.2099	1.74404	-3.02639	-3.77064	5e-05	0.00031057
Zm00001d039029	6:168918319-168921679	Uncharacterized protein ycf23	17.1416	2.16708	-2.98367	-3.72173	5e-05	0.00031057
Zm00001d019035	7:13728525-13729624	Thioredoxin H-type	23.0822	2.92863	-2.97848	-3.53347	5e-05	0.00031057
Zm00001d049252	4:22932091-22935601	Bidirectional sugar transporter SWEET14	27.8164	3.56384	-2.96443	-4.92757	5e-05	0.00031057
Zm00001d008462	8:9350133-9352749	Rust resistance kinase Lr10	10.9166	1.39937	-2.96367	-5.64585	5e-05	0.00031057
Zm00001d015877	5:127778391-127778829	#N/A	48.4263	6.2117	-2.96273	-3.76817	5e-05	0.00031057
Zm00001d044608	3:233328409-233331483	Asparagine synthetase [glutamine-hydrolyzing]	14.2021	1.82252	-2.96211	-5.10144	5e-05	0.00031057
Zm00001d010172	8:102868667-102871737	Fructose-1,6-bisphosphatase, cytosolic	19.6843	2.53184	-2.95879	-5.3984	5e-05	0.00031057
Zm00001d008485	8:9908037-9910735	0	15.3073	1.97715	-2.95272	-4.99335	5e-05	0.00031057
Zm00001d046243	9:76103854-76112147	Solute carrier family 40 member 1	10.6828	1.40542	-2.92622	-4.71771	5e-05	0.00031057
Zm00001d046937	9:111794986-111797460	Basic leucine zipper 9	119.843	15.7824	-2.92476	-8.29203	5e-05	0.00031057
Zm00001d007382	2:230338652-230341206	Transcription factor ICE1	74.2542	9.97635	-2.89589	-7.09435	5e-05	0.00031057
Zm00001d012881	5:1564031-1569101	Protein TolB	18.866	2.53861	-2.89367	-4.57157	5e-05	0.00031057
Zm00001d001941	2:3201230-3204850	Beta-fructofuranosidase, insoluble isoenzyme 7	9.35073	1.27647	-2.87291	-4.20456	5e-05	0.00031057
Zm00001d025900	10:133321692-133323074	GEM-like protein 4	26.1676	3.58963	-2.86588	-4.49751	5e-05	0.00031057
Zm00001d022444	7:177859141-177865223	.	40.863	5.65351	-2.85358	-8.61495	5e-05	0.00031057
Zm00001d014737	5:61117985-61119432	Arogenate dehydrogenase 2, chloroplastic	81.4028	11.3619	-2.84088	-6.21196	5e-05	0.00031057
Zm00001d051453	4:159243302-159244550	#N/A	7.72094	1.08197	-2.83512	-3.2953	0.0001	0.00057936
Zm00001d051974	4:175666254-175668291	Gamma-glutamylcyclotransferase 2-2	45.9695	6.49766	-2.82269	-6.89818	5e-05	0.00031057
Zm00001d035462	6:27973061-27977307	Probable 2-oxoglutarate/Fe(II)-dependent dioxygenase	16.3376	2.3281	-2.81097	-3.60284	5e-05	0.00031057
Zm00001d047261	9:124760890-124766137	3beta-hydroxysteroid-dehydrogenase/decarboxylase isoform 1	98.4761	14.1639	-2.79756	-7.24141	5e-05	0.00031057
Zm00001d025847	10:131489755-131495677	Probable inactive beta-glucosidase 14	176.418	25.4767	-2.79175	-8.13251	5e-05	0.00031057
Zm00001d053911	4:243523052-243529919	#N/A	24.742	3.57397	-2.79136	-6.52579	5e-05	0.00031057
Zm00001d039524	3:7085191-7086610	Putative nuclease HARBI1	105.281	15.3332	-2.77951	-6.42245	5e-05	0.00031057
Zm00001d008446	8:8814261-8820093	Protein MOTHER of FT and TFL1 homolog 2	52.875	7.71848	-2.7762	-5.30206	5e-05	0.00031057
Zm00001d032552	1:230238929-230243910	Protein NEOXANTHIN-DEFICIENT 1	129.438	19.0627	-2.76343	-6.22947	5e-05	0.00031057
Zm00001d005230	2:164746345-164746813	Trypsin/factor XIIA inhibitor	28359.1	4181.09	-2.76186	-6.30858	5e-05	0.00031057
Zm00001d039512	3:6248364-6252317	Hexokinase-8	477.406	71.019	-2.74894	-5.402	5e-05	0.00031057
Zm00001d002260	2:9089886-9093334	Peroxisomal (S)-2-hydroxy-acid oxidase GLO3	120.639	17.9645	-2.74748	-7.67558	5e-05	0.00031057
Zm00001d013845	5:22389217-22414978	Pyridoxal reductase, chloroplastic	390.726	58.7819	-2.73271	-7.34194	5e-05	0.00031057
Zm00001d035558	6:33061938-33063666	Salt stress-induced protein	1338.75	202.86	-2.72233	-6.81824	5e-05	0.00031057
Zm00001d037565	6:129802296-129807428	Gibberellin 2-beta-dioxygenase 2	65.9575	10.0202	-2.71863	-5.77569	5e-05	0.00031057
Zm00001d039273	3:897636-901853	Heme-binding protein 2	225.85	34.5441	-2.70886	-5.9543	5e-05	0.00031057
Zm00001d023243	10:1295377-1301629	2-isopropylmalate synthase A	767.278	117.701	-2.70462	-6.96727	5e-05	0.00031057
Zm00001d016705	5:173179371-173180406	.	215.859	33.1712	-2.70209	-7.02587	5e-05	0.00031057
Zm00001d005850	2:190827212-190830381	#N/A	8.65297	1.33083	-2.70087	-4.22304	5e-05	0.00031057
Zm00001d027422	1:4907156-4909468	PsbP-like protein 1, chloroplastic	26.0181	4.01672	-2.69543	-5.01479	5e-05	0.00031057
Zm00001d048099	9:150152052-150157292	Beta-glucosidase 6	36.555	5.68456	-2.68495	-5.9778	5e-05	0.00031057
Zm00001d028452	1:35373159-35374902	Aldehyde oxidase GLOX	125.272	19.5337	-2.68104	-7.1554	5e-05	0.00031057
Zm00001d010554	8:120208528-120210536	Gamma-glutamylcyclotransferase 2-2	143.984	22.5446	-2.67505	-7.74628	5e-05	0.00031057
Zm00001d047483	9:131741473-131744323	BTB/POZ domain-containing protein At1g03010	10.4351	1.64185	-2.66805	-4.19657	5e-05	0.00031057
Zm00001d002451	2:12958511-12961105	.	435.536	68.733	-2.66372	-7.72313	5e-05	0.00031057
Zm00001d018238	5:217193700-217195534	Thioredoxin-like 3-1, chloroplastic	16.2998	2.59226	-2.65257	-4.75296	5e-05	0.00031057
Zm00001d016469	5:163446992-163452058	Gamma-glutamylcyclotransferase 2-2	2738.84	435.679	-2.65223	-5.91625	5e-05	0.00031057
Zm00001d039826	3:15959936-15961252	#N/A	86.9877	13.9266	-2.64297	-6.00722	5e-05	0.00031057
Zm00001d042019	3:147549892-147551603	Cationic peroxidase SPC4	84.1996	13.5043	-2.64039	-6.17034	5e-05	0.00031057
Zm00001d050388	4:85201774-85202762	MADS-box transcription factor 27	8.5856	1.37831	-2.63901	-3.2902	5e-05	0.00031057
Zm00001d048520	9:157714271-157715705	Aquaporin TIP3-1	5576.66	899.516	-2.63218	-6.3151	5e-05	0.00031057
Zm00001d049813	4:45806871-45809089	Triacylglycerol lipase 2	12.6174	2.06986	-2.60781	-2.94876	0.0002	0.00106912
Zm00001d007820	2:240282216-240284226	.	19.9248	3.27646	-2.60435	-4.61837	5e-05	0.00031057
Zm00001d045042	9:10906933-10912944	Sucrose synthase 1	8305.37	1371.71	-2.59807	-3.15099	5e-05	0.00031057
Zm00001d043299	3:194991261-194992013	Photosystem II reaction center W protein, chloroplastic	59.0911	9.79085	-2.59344	-4.63336	5e-05	0.00031057
Zm00001d045484	9:24125571-24130614	Putative endo-1,3(4)-beta-glucanase 2	9.32591	1.57099	-2.56957	-3.4512	5e-05	0.00031057
Zm00001d052493	4:191343385-191345393	Stem-specific protein TSJT1	558.902	94.3401	-2.56665	-7.49354	5e-05	0.00031057
Zm00001d026625	10:149117609-149118763	.	28.0319	4.75044	-2.56094	-3.60847	5e-05	0.00031057
Zm00001d035308	6:20483348-20484802	2'-deoxymugineic-acid 2'-dioxygenase	413.746	70.4088	-2.55492	-7.57162	5e-05	0.00031057
Zm00001d025652	10:125102973-125107740	Indole-3-glycerol phosphate synthase, chloroplastic	45.5873	7.75788	-2.5549	-6.33083	5e-05	0.00031057
Zm00001d039346	3:2195055-2197943	Probable indole-3-acetic acid-amido synthetase GH3.12	9.03819	1.54172	-2.55149	-3.83594	5e-05	0.00031057
Zm00001d038597	6:160677918-160678539	19 kDa globulin	3218.66	549.243	-2.55094	-7.28248	5e-05	0.00031057
Zm00001d011001	8:136349223-136350602	UPF0014 membrane protein STAR2	10.0605	1.73147	-2.53863	-2.90372	0.0004	0.00196604
Zm00001d029948	1:96084381-96087383	Serine/threonine-protein kinase D6PKL2	15.7332	2.72674	-2.52856	-4.82469	5e-05	0.00031057
Zm00001d008477	8:9807194-9830853	Rust resistance kinase Lr10	7.17705	1.24671	-2.52526	-3.95118	5e-05	0.00031057
Zm00001d050735	4:119801303-119810726	Tetratricopeptide repeat protein 33	13.4813	2.34957	-2.52049	-4.18674	5e-05	0.00031057
Zm00001d022314	7:175011110-175013805	Probable mediator of RNA polymerase II transcription subunit 26b	28.1096	4.92769	-2.51208	-5.34232	5e-05	0.00031057
Zm00001d048814	4:5912543-5913628	Dirigent protein 1	30.3998	5.34992	-2.50647	-4.06305	5e-05	0.00031057
Zm00001d034977	6:663668-664313	NDR1/HIN1-like protein 12	27.7647	4.89509	-2.50384	-3.48513	5e-05	0.00031057
Zm00001d012304	8:172140279-172142915	Cytochrome P450 94C1	51.5527	9.18371	-2.4889	-5.60085	5e-05	0.00031057
Zm00001d013746	5:19171912-19174748	#N/A	99.0496	17.7654	-2.47908	-7.22974	5e-05	0.00031057
Zm00001d014852	5:65588996-65591442	Transport and Golgi organization 2 homolog	269.196	48.5697	-2.47053	-7.16213	5e-05	0.00031057
Zm00001d042256	3:157560974-157565462	Inactive protein kinase SELMODRAFT_444075	19.3152	3.50104	-2.46388	-5.63112	5e-05	0.00031057
Zm00001d045462	9:23107328-23111318	Granule-bound starch synthase 1, chloroplastic/amyloplastic	23.4732	4.25621	-2.46337	-3.14079	5e-05	0.00031057
Zm00001d036608	6:94231653-94235649	Probable alpha-glucosidase Os06g0675700	1873.22	340.698	-2.45895	-5.70426	5e-05	0.00031057
Zm00001d001812	2:1341010-1342402	Rubisco accumulation factor 1, chloroplastic	8.87442	1.6255	-2.44877	-3.10934	0.00015	0.000830091
Zm00001d022380	7:176458893-176460507	.	38.2532	7.01947	-2.44615	-5.06256	5e-05	0.00031057
Zm00001d017168	5:187805176-187809851	Acetolactate synthase small subunit 2, chloroplastic	358.862	65.9359	-2.44429	-5.16164	5e-05	0.00031057
Zm00001d052958	4:206306307-206307489	Antimicrobial peptides	2001.58	367.845	-2.44397	-5.50169	5e-05	0.00031057
Zm00001d018901	7:8756086-8758156	.	17.4436	3.22079	-2.43721	-4.35959	5e-05	0.00031057
Zm00001d049361	4:27879418-27894268	Serine/threonine-protein kinase HT1	59.7527	11.1278	-2.42483	-6.99363	5e-05	0.00031057
Zm00001d006161	2:200087622-200089298	Alpha-L-fucosidase 1	5.93493	1.11353	-2.41409	-2.99935	5e-05	0.00031057
Zm00001d023143	10:94783275-94783754	#N/A	126.883	23.8746	-2.40996	-4.28529	5e-05	0.00031057
Zm00001d030261	1:117216447-117216960	#N/A	9.42287	1.77533	-2.40808	-2.28072	0.002	0.00763302
Zm00001d004438	2:111722005-111775606	Pullulanase 1, chloroplastic	103.724	19.5648	-2.40641	-6.00137	5e-05	0.00031057
Zm00001d050336	4:82004912-82010291	Methylcrotonoyl-CoA carboxylase beta chain, mitochondrial	140.234	26.522	-2.40257	-7.27527	5e-05	0.00031057
Zm00001d020984	7:139074708-139076907	Probable sarcosine oxidase	850.406	160.887	-2.4021	-7.23041	5e-05	0.00031057
Zm00001d022494	7:178744243-178745200	Zinc finger CCCH domain-containing protein 54	1306.54	247.363	-2.40106	-7.35423	5e-05	0.00031057
Zm00001d028808	1:47025642-47026431	Wound-induced protein 1	170.158	32.2744	-2.39841	-5.68319	5e-05	0.00031057
Zm00001d039851	3:16611924-16616740	#N/A	32.4891	6.16874	-2.39691	-5.72174	5e-05	0.00031057
Zm00001d016811	5:176930371-176936129	ACT domain-containing protein ACR3	291.11	55.6361	-2.38747	-7.33403	5e-05	0.00031057
Zm00001d034366	1:290941601-290947822	Protein IQ-DOMAIN 1	16.0393	3.07181	-2.38445	-4.98123	5e-05	0.00031057
Zm00001d034027	1:281459767-281460979	Universal stress protein A-like protein	44.0921	8.52657	-2.37048	-4.08947	5e-05	0.00031057
Zm00001d004006	2:75025144-75030389	SNF1-related protein kinase regulatory subunit gamma-1	27.175	5.26244	-2.36848	-6.09676	5e-05	0.00031057
Zm00001d043706	3:207941096-207942500	Transcription factor bHLH3	10.2003	1.98778	-2.35938	-3.25311	5e-05	0.00031057
Zm00001d013759	5:19607075-19608662	Ent-cassadiene C2-hydroxylase	9.05126	1.76628	-2.35741	-3.34178	5e-05	0.00031057
Zm00001d026632	10:149192882-149193680	Stem-specific protein TSJT1	1396.2	273.2	-2.35348	-7.09506	5e-05	0.00031057
Zm00001d038003	6:144813892-144814871	#N/A	544.018	106.973	-2.34641	-6.86827	5e-05	0.00031057
Zm00001d032060	1:211112192-211116480	Probable GTP diphosphokinase RSH2, chloroplastic	23.2541	4.57405	-2.34594	-6.07526	5e-05	0.00031057
Zm00001d019311	7:26986085-26993698	IAA-amino acid hydrolase ILR1-like 7	221.556	43.822	-2.33794	-6.46	5e-05	0.00031057
Zm00001d029783	1:86734086-86736135	Expansin-like A2	148.387	29.6447	-2.32351	-6.01419	5e-05	0.00031057
Zm00001d051288	4:151822044-151825605	Vesicle-associated protein 1-2	109.854	22.0967	-2.31368	-6.68645	5e-05	0.00031057
Zm00001d026635	10:149245573-149251541	Probable allantoinase	36.4469	7.33685	-2.31256	-6.02856	5e-05	0.00031057
Zm00001d012031	8:166790118-166792274	#N/A	16.7701	3.37748	-2.31187	-4.08054	5e-05	0.00031057
Zm00001d046714	9:103118696-103123559	Cinnamoyl-CoA reductase 1	39.8048	8.06658	-2.30291	-5.18222	5e-05	0.00031057
Zm00001d047479	9:131494598-131498207	Superoxide dismutase [Cu-Zn] 4A	60.6043	12.3264	-2.29767	-5.21778	5e-05	0.00031057
Zm00001d028471	1:35960440-35964750	Phosphoenolpyruvate carboxykinase [ATP]	17.0268	3.46765	-2.29578	-4.44009	5e-05	0.00031057
Zm00001d018838	7:6931378-6932996	#N/A	16.5693	3.38146	-2.2928	-3.46318	5e-05	0.00031057
Zm00001d016305	5:156480112-156483789	Peroxisomal membrane protein PMP22	93.1799	19.0481	-2.29037	-6.31039	5e-05	0.00031057
Zm00001d045432	9:21983518-21984415	#N/A	5.68922	1.16348	-2.28978	-2.30936	0.0026	0.00948567
Zm00001d047124	9:119370183-119372706	Proline dehydrogenase 2, mitochondrial	48.1107	9.84202	-2.28933	-5.22086	5e-05	0.00031057
Zm00001d012030	8:166780697-166784066	Transcription and mRNA export factor SUS1	8.86444	1.82685	-2.27867	-2.51066	5e-05	0.00031057
Zm00001d027809	1:14207662-14212490	Protein SULFUR DEFICIENCY-INDUCED 1	9.75035	2.02282	-2.26908	-2.44349	5e-05	0.00031057
Zm00001d039293	3:1167222-1168320	Aquaporin TIP4-4	23.447	4.89356	-2.26045	-3.02914	5e-05	0.00031057
Zm00001d034986	6:840920-842925	indole-2-monooxygenase	47.0202	9.90029	-2.24774	-5.56358	5e-05	0.00031057
Zm00001d011673	8:158269866-158274000	Farnesyl pyrophosphate synthase	9.98309	2.10354	-2.24666	-4.57434	5e-05	0.00031057
Zm00001d023290	10:2230213-2231452	Gibberellin-regulated protein 6	12.1262	2.55655	-2.24586	-2.74075	0.00015	0.000830091
Zm00001d008905	8:24709688-24711452	Peptide-N4-(N-acetyl-beta-glucosaminyl)asparagine amidase A	11.3781	2.40582	-2.24166	-3.19668	5e-05	0.00031057
Zm00001d025400	10:117015013-117016890	FAD-dependent urate hydroxylase	23.1953	4.91067	-2.23984	-4.11639	5e-05	0.00031057
Zm00001d029170	1:60930750-60934311	Superoxide dismutase [Cu-Zn] 4A	188.375	39.8862	-2.23964	-6.30415	5e-05	0.00031057
Zm00001d037969	6:143834711-143836988	Subtilisin-chymotrypsin inhibitor-2A	144.878	30.7596	-2.23573	-3.18612	5e-05	0.00031057
Zm00001d038288	6:153438836-153439986	Transcription factor DIVARICATA	97.249	20.6577	-2.235	-5.1644	5e-05	0.00031057
Zm00001d052475	4:190839084-190842202	Cytochrome P450 90A1	135.677	28.8216	-2.23495	-6.46165	5e-05	0.00031057
Zm00001d037631	6:132458320-132458674	#N/A	110.967	23.6275	-2.2316	-2.73676	0.00015	0.000830091
Zm00001d012544	8:176420876-176424706	Transcription factor GAMYB	11.5103	2.45925	-2.22663	-4.11702	5e-05	0.00031057
Zm00001d047555	9:135294591-135297188	Thioredoxin-like 1-2, chloroplastic	16.6961	3.58448	-2.21968	-4.37029	5e-05	0.00031057
Zm00001d011572	8:154714165-154721196	Serine/threonine-protein kinase CTR1	14.4691	3.11721	-2.21465	-5.07009	5e-05	0.00031057
Zm00001d035700	6:41696311-41698431	Glutelin type-B 1	4592.53	992.728	-2.20982	-3.90999	5e-05	0.00031057
Zm00001d016572	5:167860551-167862743	Acetolactate synthase 1, chloroplastic	458.227	99.2437	-2.20701	-6.35942	5e-05	0.00031057
Zm00001d049750	4:43097309-43100039	Probable LRR receptor-like serine/threonine-protein kinase At4g31250	9.71345	2.10434	-2.20662	-3.31057	5e-05	0.00031057
Zm00001d008435	8:8639916-8642774	Beta-glucosidase 1	10.6235	2.31397	-2.19881	-3.58188	5e-05	0.00031057
Zm00001d028733	1:44554394-44560803	Serine/threonine protein kinase OSK4	20.0384	4.36537	-2.19859	-5.93669	5e-05	0.00031057
Zm00001d046188	9:70766238-70767030	.	27.3266	5.96617	-2.19543	-3.64327	5e-05	0.00031057
Zm00001d017622	5:201997948-201998494	.	70.7213	15.4554	-2.19404	-3.80976	5e-05	0.00031057
Zm00001d029778	1:86529693-86530424	EC protein homolog	370.557	81.0021	-2.19366	-6.14857	5e-05	0.00031057
Zm00001d042811	3:180893819-180895226	Nematode resistance protein-like HSPRO2	15.2969	3.34838	-2.1917	-3.51952	5e-05	0.00031057
Zm00001d039710	3:12751563-12753836	Thioredoxin H4-2	40.5215	8.88693	-2.18893	-4.23446	5e-05	0.00031057
Zm00001d032030	1:209949066-209949613	Chaperone protein dnaJ 11, chloroplastic	94.4001	20.7565	-2.18523	-4.0172	5e-05	0.00031057
Zm00001d022541	7:179741779-179745492	Trafficking protein particle complex subunit 2	19.2562	4.24501	-2.18149	-3.27923	5e-05	0.00031057
Zm00001d005998	2:194954683-194956316	Caffeoyl-CoA O-methyltransferase	89.4781	19.769	-2.17829	-5.23493	5e-05	0.00031057
Zm00001d043371	3:197949317-197949674	#N/A	85.5325	18.9105	-2.17729	-2.78275	0.0003	0.0015276
Zm00001d033522	1:265502801-265506169	GDSL esterase/lipase At5g03810	5.32484	1.1867	-2.16579	-2.51464	0.00065	0.00296301
Zm00001d012128	8:168571951-168576042	Two-component response regulator ORR26	8.17335	1.82349	-2.16423	-4.58172	5e-05	0.00031057
Zm00001d032279	1:220036839-220043811	ABC transporter A family member 2	49.9084	11.1511	-2.1621	-6.6238	5e-05	0.00031057
Zm00001d026111	10:138699396-138708217	Protein argonaute 1B	11.5977	2.59386	-2.16067	-5.39279	5e-05	0.00031057
Zm00001d046467	9:91188675-91199100	UDP-galactose/UDP-glucose transporter 3	84.3425	18.8691	-2.16023	-6.17201	5e-05	0.00031057
Zm00001d030262	1:117245699-117246281	#N/A	15.7303	3.54568	-2.14942	-2.73091	0.0003	0.0015276
Zm00001d014249	5:38005177-38006513	Protein TIFY 11c	166.972	37.6571	-2.14861	-5.97573	5e-05	0.00031057
Zm00001d011573	8:154750702-154754636	.	12.45	2.81172	-2.14662	-4.38962	5e-05	0.00031057
Zm00001d020867	7:135064148-135071720	Subtilisin-like protease SBT5.4	106.259	24.0621	-2.14275	-6.22207	5e-05	0.00031057
Zm00001d039582	3:8333381-8337535	Type IV inositol polyphosphate 5-phosphatase 3	66.5757	15.0788	-2.14247	-5.74921	5e-05	0.00031057
Zm00001d016741	5:174747157-174747697	.	132.287	29.9665	-2.14225	-4.24527	5e-05	0.00031057
Zm00001d048959	4:10754325-10760391	Aquaporin SIP1-1	435.673	99.2002	-2.13483	-5.15353	5e-05	0.00031057
Zm00001d039648	3:10362845-10363205	#N/A	44.471	10.1438	-2.13226	-2.00143	0.00265	0.0096319
Zm00001d039066	6:169497056-169501065	Putative glucose-6-phosphate 1-epimerase	75.3959	17.2136	-2.13094	-5.70849	5e-05	0.00031057
Zm00001d016332	5:157723542-157726011	Probable protein phosphatase 2C 12	160.62	36.7436	-2.12809	-5.85937	5e-05	0.00031057
Zm00001d001852	2:1946283-1947096	Gibberellin-regulated protein 3	1017.03	233.244	-2.12445	-6.08343	5e-05	0.00031057
Zm00001d007010	2:220153464-220153869	#N/A	301.005	69.2083	-2.12077	-4.3338	5e-05	0.00031057
Zm00001d001772	2:475370-476004	Protein YLS9	19.2995	4.47516	-2.10855	-2.59039	0.0004	0.00196604
Zm00001d013786	5:20161441-20163432	.	155.7	36.1044	-2.10852	-6.20959	5e-05	0.00031057
Zm00001d040731	3:60610219-60613780	GDSL esterase/lipase LIP-4	51.6642	11.9914	-2.10716	-4.99004	5e-05	0.00031057
Zm00001d025081	10:102855785-102857533	Thiosulfate sulfurtransferase 16, chloroplastic	955.652	221.839	-2.10697	-5.7841	5e-05	0.00031057
Zm00001d020055	7:89024720-89033607	Polyadenylate-binding protein-interacting protein 11	79.7201	18.5236	-2.10558	-5.95744	5e-05	0.00031057
Zm00001d002593	2:16317431-16320079	Protein FATTY ACID EXPORT 4, chloroplastic	10.7416	2.50266	-2.10167	-2.83414	5e-05	0.00031057
Zm00001d003247	2:37815901-37818424	Malate synthase, glyoxysomal	442.915	103.266	-2.10067	-6.3532	5e-05	0.00031057
Zm00001d016568	5:167817323-167817819	#N/A	199.937	46.6193	-2.10054	-4.58449	5e-05	0.00031057
Zm00001d006815	2:217206391-217206862	#N/A	13.6512	3.19299	-2.09605	-2.11074	0.00225	0.00841279
Zm00001d038557	6:159799342-159805962	Dr1-associated corepressor	26.8026	6.27864	-2.09385	-4.04506	5e-05	0.00031057
Zm00001d008111	8:142280181-142281031	#N/A	6.62874	1.56094	-2.08632	-2.66544	5e-05	0.00031057
Zm00001d036345	6:85061294-85065182	Phytoene synthase, chloroplastic	17.4035	4.1204	-2.07852	-4.62123	5e-05	0.00031057
Zm00001d040665	3:57044874-57051682	Protein DETOXIFICATION 45, chloroplastic	19.4188	4.59928	-2.07797	-5.2177	5e-05	0.00031057
Zm00001d006864	2:218087910-218097868	#N/A	108.642	25.7544	-2.07669	-2.5054	5e-05	0.00031057
Zm00001d013135	5:5325996-5328420	Probable ribose-5-phosphate isomerase 4, chloroplastic	4.33445	1.02887	-2.07478	-2.7341	5e-05	0.00031057
Zm00001d045340	9:19216310-19218442	Cysteine synthase, chloroplastic/chromoplastic	10.2034	2.42722	-2.07168	-2.38644	5e-05	0.00031057
Zm00001d021826	7:163783013-163786943	Scarecrow-like protein 23	7.18456	1.71607	-2.06579	-2.38508	0.00105	0.00442562
Zm00001d005951	2:193728104-193730506	Homeobox-leucine zipper protein HOX4	13.7849	3.307	-2.0595	-3.80225	5e-05	0.00031057
Zm00001d033937	1:279124551-279128540	Granule-bound starch synthase 1, chloroplastic/amyloplastic	31.8498	7.65275	-2.05723	-3.11366	5e-05	0.00031057
Zm00001d038607	6:160895232-160895538	.	116.665	28.0561	-2.05599	-2.30885	0.0012	0.00494945
Zm00001d026638	10:149256533-149258518	Calumenin	22.5325	5.44857	-2.04806	-3.64903	5e-05	0.00031057
Zm00001d042011	3:147226318-147227691	.	3244.24	786.171	-2.04497	-5.27057	5e-05	0.00031057
Zm00001d003775	2:58629386-58630133	.	18.3348	4.46967	-2.03634	-2.87543	0.0002	0.00106912
Zm00001d046723	9:103579653-103582402	Expansin-A16	4.69976	1.15194	-2.02852	-2.31271	0.0008	0.00353513
Zm00001d041774	3:137063372-137063753	.	32.5024	8.01306	-2.02012	-2.21197	0.0009	0.00389168
Zm00001d002880	2:25546608-25550239	3-isopropylmalate dehydrogenase 2, chloroplastic	107.772	26.5792	-2.01961	-6.27295	5e-05	0.00031057
Zm00001d039065	6:169491184-169496107	G-box-binding factor 2	61.8916	15.267	-2.01933	-5.55407	5e-05	0.00031057
Zm00001d021752	7:162190358-162195447	Equilibrative nucleotide transporter 3	15.6931	3.87666	-2.01724	-4.12081	5e-05	0.00031057
Zm00001d024302	10:62902287-62903162	Defensin-like protein 2	3159.45	781.665	-2.01505	-5.0968	5e-05	0.00031057
Zm00001d040362	3:40080594-40084385	Cyclic dof factor 2	12.0638	2.99068	-2.01213	-4.36342	5e-05	0.00031057
Zm00001d019775	7:59466761-59468544	#N/A	25.4072	6.3095	-2.00964	-3.24277	5e-05	0.00031057
Zm00001d009580	8:71626295-71629642	Urease accessory protein G	52.2895	12.9987	-2.00815	-5.17559	5e-05	0.00031057
Zm00001d039926	3:19724662-19729488	LEAF RUST 10 DISEASE-RESISTANCE LOCUS RECEPTOR-LIKE PROTEIN KINASE-like 1.2	6.52969	1.62322	-2.00815	-3.04976	0.0001	0.00057936
Zm00001d032056	1:210966209-210973774	#N/A	19.2284	4.79577	-2.0034	-5.70756	5e-05	0.00031057
Zm00001d011975	8:165490509-165506030	UPF0400 protein C337.03	157.949	39.4107	-2.0028	-5.09134	5e-05	0.00031057
Zm00001d013182	5:6080868-6083740	BTB/POZ domain-containing protein At5g66560	16.2565	4.05934	-2.0017	-4.03405	5e-05	0.00031057
Zm00001d020680	7:127860532-127863145	PHD finger protein PERSISTENT TAPETAL CELL 1	34.1295	8.53208	-2.00005	-4.5466	5e-05	0.00031057
Zm00001d024718	10:84950248-84953025	Beta-carotene isomerase D27, chloroplastic	9.79147	2.44821	-1.9998	-2.83774	5e-05	0.00031057
Zm00001d000329	B73V4_ctg247:802-19871	0	6.02071	1.50784	-1.99745	-3.96331	5e-05	0.00031057
Zm00001d031168	1:180447017-180448137	Glycine-rich RNA-binding, abscisic acid-inducible protein	14168.4	3549.56	-1.99697	-3.18208	5e-05	0.00031057
Zm00001d007169	2:223717698-223722755	.	24.0699	6.03383	-1.99608	-6.03034	5e-05	0.00031057
Zm00001d004650	2:125937580-125938516	.	17.0345	4.27065	-1.99593	-2.99446	0.0001	0.00057936
Zm00001d043653	3:206093165-206100268	Type IV inositol polyphosphate 5-phosphatase 3	18.9269	4.77794	-1.98598	-5.87137	5e-05	0.00031057
Zm00001d018356	5:219142627-219145001	#N/A	7.15505	1.80679	-1.98554	-2.33573	5e-05	0.00031057
Zm00001d033233	1:255287265-255290302	Putative hydrolase C777.06c	8.91725	2.2553	-1.98328	-2.76555	5e-05	0.00031057
Zm00001d025901	10:133326340-133328048	Putative GEM-like protein 8	24.7037	6.2647	-1.97941	-4.12985	5e-05	0.00031057
Zm00001d016588	5:168633140-168636493	Glycerophosphodiester phosphodiesterase GDPD2	178.522	45.3379	-1.97731	-5.9961	5e-05	0.00031057
Zm00001d017146	5:186848204-186851779	#N/A	4.09643	1.04305	-1.97356	-2.89586	5e-05	0.00031057
Zm00001d016738	5:174732800-174733343	#N/A	27.1623	6.92172	-1.9724	-2.68949	0.0002	0.00106912
Zm00001d051965	4:175517243-175528400	Lysine-specific demethylase JMJ703	22.6584	5.80257	-1.96528	-5.99917	5e-05	0.00031057
Zm00001d017378	5:193867339-193868107	E3 ubiquitin-protein ligase RMA1H1	16.1899	4.14665	-1.96507	-2.76268	5e-05	0.00031057
Zm00001d051359	4:155950791-155951832	Acetylglutamate kinase, chloroplastic	45.1998	11.5774	-1.96501	-3.8605	5e-05	0.00031057
Zm00001d005933	2:193264828-193267543	Purine permease 3	18.7176	4.79697	-1.9642	-3.04759	5e-05	0.00031057
Zm00001d040834	3:68850847-68852784	26S proteasome non-ATPase regulatory subunit 4 homolog	98.2505	25.2641	-1.95938	-4.19557	5e-05	0.00031057
Zm00001d039318	3:1628529-1630150	Probable membrane-associated kinase regulator 2	15.641	4.02998	-1.95648	-2.97725	0.0001	0.00057936
Zm00001d029879	1:91814772-91819708	#N/A	166.521	42.9121	-1.95625	-5.50082	5e-05	0.00031057
Zm00001d048307	9:154291033-154291288	#N/A	487.894	125.885	-1.95446	-2.55424	0.00025	0.00130155
Zm00001d020697	7:128987296-128989420	Phosphatidylinositol 4-phosphate 5-kinase 8	35.3413	9.11895	-1.95442	-4.75179	5e-05	0.00031057
Zm00001d033385	1:261226684-261227740	Probable galacturonosyltransferase-like 2	18.764	4.84364	-1.9538	-2.73945	5e-05	0.00031057
Zm00001d042779	3:179446821-179448624	ABSCISIC ACID-INSENSITIVE 5-like protein 4	110.565	28.5813	-1.95175	-5.44077	5e-05	0.00031057
Zm00001d035194	6:8811526-8823988	WD repeat-containing protein 26	16.8015	4.34663	-1.95062	-5.73153	5e-05	0.00031057
Zm00001d051435	4:158470457-158473134	#N/A	23.6864	6.13374	-1.94922	-4.28315	5e-05	0.00031057
Zm00001d018752	7:4246630-4250540	Leucine-rich repeat receptor-like serine/threonine-protein kinase BAM1	40.8555	10.5995	-1.94653	-5.33226	5e-05	0.00031057
Zm00001d001286	7:178742923-178743531	#N/A	99.462	25.8169	-1.94583	-4.4796	5e-05	0.00031057
Zm00001d029272	1:64438230-64479765	Peptidyl-prolyl cis-trans isomerase PASTICCINO1	145.036	37.7118	-1.94333	-4.63443	5e-05	0.00031057
Zm00001d020808	7:133517157-133521665	Peroxidase 17	74.2581	19.3247	-1.9421	-4.81156	5e-05	0.00031057
Zm00001d032095	1:212364321-212366865	Ethylene-responsive transcription factor ERF071	66.473	17.3114	-1.94104	-5.86949	5e-05	0.00031057
Zm00001d047435	9:129902111-129912207	Stomatal closure-related actin-binding protein 1	24.517	6.38531	-1.94096	-5.13752	5e-05	0.00031057
Zm00001d037632	6:132468545-132468905	#N/A	175.896	45.8352	-1.94019	-2.8316	5e-05	0.00031057
Zm00001d000256	B73V4_ctg100:4351-11693	0	56.5643	14.7564	-1.93855	-5.77241	5e-05	0.00031057
Zm00001d002873	2:25237628-25241162	UPF0426 protein At1g28150, chloroplastic	7.51725	1.96296	-1.93717	-2.26012	0.00055	0.00257305
Zm00001d044175	3:221168476-221175604	Neutral ceramidase	64.0295	16.7214	-1.93704	-5.85063	5e-05	0.00031057
Zm00001d018525	5:222474887-222481326	Plant intracellular Ras-group-related LRR protein 6	18.2296	4.76672	-1.93521	-5.0531	5e-05	0.00031057
Zm00001d001700	5:186597490-186600397	#N/A	26.2368	6.86722	-1.93379	-2.96552	5e-05	0.00031057
Zm00001d029806	1:87745830-87748178	NEP1-interacting protein 2	21.5715	5.64884	-1.9331	-3.31872	5e-05	0.00031057
Zm00001d029919	1:94344536-94349899	Putative pre-16S rRNA nuclease	4.68066	1.22956	-1.92857	-2.33597	0.0003	0.0015276
Zm00001d043652	3:206061768-206065885	Probable choline kinase 2	4.91666	1.29208	-1.92798	-3.19655	5e-05	0.00031057
Zm00001d017482	5:197272186-197275723	.	3.83157	1.00746	-1.92721	-2.68124	0.0003	0.0015276
Zm00001d017390	5:194300861-194304543	Vesicle-associated protein 1-2	9.90075	2.60683	-1.92524	-3.54608	5e-05	0.00031057
Zm00001d044999	9:9673704-9676005	#N/A	25.4363	6.71152	-1.92218	-3.96363	5e-05	0.00031057
Zm00001d018837	7:6925326-6929344	BURP domain-containing protein 4	18.5424	4.90598	-1.91821	-3.92205	5e-05	0.00031057
Zm00001d029937	1:95421200-95422724	.	9.83888	2.60598	-1.91667	-2.95263	5e-05	0.00031057
Zm00001d017118	5:185974545-185976455	Protein HHL1, chloroplastic	12.7957	3.39035	-1.91616	-3.19034	5e-05	0.00031057
Zm00001d011563	8:154569381-154576253	Katanin p60 ATPase-containing subunit A-like 2	74.8318	20.0566	-1.89957	-5.67499	5e-05	0.00031057
Zm00001d027469	1:6020778-6023318	Cytochrome c oxidase assembly protein COX19	28.5287	7.65688	-1.89759	-3.50354	5e-05	0.00031057
Zm00001d032825	1:239383320-239384004	#N/A	8.19059	2.20051	-1.89613	-2.25918	0.00075	0.00334812
Zm00001d034487	1:294256801-294261060	SEC12-like protein 1	3.95522	1.06706	-1.89011	-2.79363	5e-05	0.00031057
Zm00001d046767	9:104954886-104960193	Zinc finger A20 and AN1 domain-containing stress-associated protein 8	1942.58	524.836	-1.88804	-4.38978	5e-05	0.00031057
Zm00001d002428	2:12420570-12421886	.	177.977	48.1058	-1.88741	-4.88386	5e-05	0.00031057
Zm00001d050155	4:69592906-69594252	Probable gluconokinase	34.0949	9.22827	-1.88542	-3.25246	5e-05	0.00031057
Zm00001d005470	2:175268256-175268892	#N/A	49.0984	13.2964	-1.88464	-3.52718	5e-05	0.00031057
Zm00001d039087	6:169776868-169778071	Phospholipase A1-II 6	26.0947	7.08679	-1.88055	-3.352	5e-05	0.00031057
Zm00001d005892	2:191897838-191898630	Ethylene-responsive transcription factor ERF109	5.89507	1.60161	-1.87998	-2.07013	0.00145	0.00579593
Zm00001d017030	5:183181316-183184853	Protein FLUORESCENT IN BLUE LIGHT, chloroplastic	61.8114	16.8524	-1.87492	-5.22082	5e-05	0.00031057
Zm00001d012015	8:166514040-166517345	Squamosa promoter-binding-like protein 2	13.8508	3.77784	-1.87433	-3.26634	5e-05	0.00031057
Zm00001d020530	7:121046187-121056362	Putrescine hydroxycinnamoyltransferase 1	132.458	36.1999	-1.87148	-5.15786	5e-05	0.00031057
Zm00001d015914	5:130947370-130950710	Bidirectional sugar transporter SWEET4	15.0985	4.14429	-1.8652	-2.81637	5e-05	0.00031057
Zm00001d011832	8:162291111-162292515	Epidermis-specific secreted glycoprotein EP1	126.568	34.7653	-1.86419	-4.86359	5e-05	0.00031057
Zm00001d012672	8:178360606-178372390	Formamidase	10.574	2.91006	-1.8614	-3.59513	5e-05	0.00031057
Zm00001d002135	2:6449295-6454805	FGGY carbohydrate kinase domain-containing protein	7.49367	2.06673	-1.85832	-3.58526	5e-05	0.00031057
Zm00001d052184	4:182563206-182565812	Protein CURVATURE THYLAKOID 1D, chloroplastic	6.88414	1.90281	-1.85514	-2.41969	0.00015	0.000830091
Zm00001d010918	8:133384900-133388865	.	48.5291	13.4141	-1.85511	-5.50797	5e-05	0.00031057
Zm00001d039913	3:19194747-19210804	MADS-box transcription factor 51	34.0234	9.41225	-1.85391	-2.88194	5e-05	0.00031057
Zm00001d036340	6:84776705-84778799	Photosystem II stability/assembly factor HCF136, chloroplastic	3.76152	1.04076	-1.85367	-2.58818	0.0002	0.00106912
Zm00001d037070	6:111356539-111357835	Neutral ceramidase	10.7786	2.98724	-1.85128	-1.82382	0.00145	0.00579593
Zm00001d019192	7:21068391-21068820	Alpha-amylase/trypsin inhibitor	180.656	50.088	-1.85071	-8.24962	5e-05	0.00031057
Zm00001d024303	10:62903386-62904298	Defensin-like protein 1	562.709	156.027	-1.85059	-5.0803	5e-05	0.00031057
Zm00001d008957	8:27190532-27195349	Jasmonic acid-amido synthetase JAR1	132.417	36.7809	-1.84806	-5.5582	5e-05	0.00031057
Zm00001d014456	5:48034202-48043502	Glutamate receptor 3.4	4.49692	1.25044	-1.8465	-3.67489	5e-05	0.00031057
Zm00001d053816	4:241615197-241618538	Thiosulfate/3-mercaptopyruvate sulfurtransferase 1, mitochondrial	15.2392	4.24661	-1.84341	-3.83079	5e-05	0.00031057
Zm00001d042357	3:163188683-163192336	Protein XRI1	6.07266	1.69729	-1.8391	-3.16138	5e-05	0.00031057
Zm00001d022041	7:168429143-168434437	#N/A	49.985	13.9865	-1.83746	-5.50739	5e-05	0.00031057
Zm00001d034062	1:282851672-282854411	PLASMODESMATA CALLOSE-BINDING PROTEIN 3	230.123	64.4253	-1.83671	-5.37533	5e-05	0.00031057
Zm00001d021645	7:158959003-158960016	Protein LHCP TRANSLOCATION DEFECT	10.3472	2.89756	-1.83633	-2.55876	0.00045	0.00217427
Zm00001d042341	3:162111301-162114273	#N/A	21.7093	6.10702	-1.82977	-3.64339	5e-05	0.00031057
Zm00001d033160	1:252546118-252549217	Isoaspartyl peptidase/L-asparaginase 1	23.5029	6.61372	-1.82931	-3.8548	5e-05	0.00031057
Zm00001d022550	7:179802618-179805281	ABSCISIC ACID-INSENSITIVE 5-like protein 3	7.63453	2.14864	-1.82912	-2.49396	0.00025	0.00130155
Zm00001d007144	2:223318791-223321790	#N/A	8.09374	2.28179	-1.82664	-3.00374	5e-05	0.00031057
Zm00001d026295	10:143128212-143138549	#N/A	20.8853	5.89034	-1.82606	-4.95521	5e-05	0.00031057
Zm00001d002835	2:24248331-24253472	Probable LRR receptor-like serine/threonine-protein kinase At1g63430	47.0316	13.2674	-1.82574	-5.30035	5e-05	0.00031057
Zm00001d028201	1:26041524-26045818	Protein transport protein Sec61 subunit alpha	664.877	187.657	-1.82499	-5.0363	5e-05	0.00031057
Zm00001d011435	8:150433595-150434378	#N/A	30.9476	8.75877	-1.82103	-2.90708	5e-05	0.00031057
Zm00001d035512	6:30481709-30486777	Floral homeotic protein APETALA 2	18.9502	5.37799	-1.81707	-3.04967	5e-05	0.00031057
Zm00001d005283	2:167666605-167667184	.	12.4959	3.54773	-1.81649	-2.19597	0.00105	0.00442562
Zm00001d019457	7:34632587-34634215	CASP-like protein 1D1	12.6174	3.5838	-1.81585	-2.74842	0.00015	0.000830091
Zm00001d030109	1:106376177-106378884	Probable inactive shikimate kinase like 2, chloroplastic	8.32904	2.3702	-1.81314	-3.16284	5e-05	0.00031057
Zm00001d025889	10:133103779-133106556	Probable metal-nicotianamine transporter YSL12	5.45453	1.55963	-1.80625	-2.67663	0.0001	0.00057936
Zm00001d007765	2:239267458-239269600	Probable prolyl 4-hydroxylase 7	374.506	107.144	-1.80544	-4.33769	5e-05	0.00031057
Zm00001d037937	6:142777669-142778191	Uncharacterized protein At5g01610	53.568	15.3357	-1.80448	-2.84078	5e-05	0.00031057
Zm00001d038149	6:149411277-149417608	#N/A	4.13819	1.1857	-1.80326	-3.02442	5e-05	0.00031057
Zm00001d025278	10:112299569-112307718	Protein MEI2-like 4	57.1683	16.4214	-1.79964	-5.70965	5e-05	0.00031057
Zm00001d021401	7:151061638-151067413	Signal peptidase complex subunit 3B	124.874	35.943	-1.79669	-5.18926	5e-05	0.00031057
Zm00001d032333	1:222796869-222804025	Phosphoglucan phosphatase LSF1, chloroplastic	21.5136	6.20084	-1.79471	-4.79636	5e-05	0.00031057
Zm00001d048899	4:7354894-7358497	HVA22-like protein a	83.355	24.0263	-1.79466	-5.2938	5e-05	0.00031057
Zm00001d011639	8:157135996-157137214	AP2/ERF and B3 domain-containing protein Os01g0693400	106.868	30.8156	-1.7941	-4.71812	5e-05	0.00031057
Zm00001d009890	8:87550200-87555557	#N/A	31.2074	9.00163	-1.79363	-4.27265	5e-05	0.00031057
Zm00001d013175	5:5935830-5936304	#N/A	27.3833	7.90969	-1.7916	-2.20132	0.00085	0.00371002
Zm00001d002119	2:6125332-6132308	ABC transporter B family member 19	7.09427	2.05439	-1.78794	-4.08766	5e-05	0.00031057
Zm00001d045160	9:14630322-14638218	Sulfiredoxin, chloroplastic/mitochondrial	8.21393	2.38401	-1.78468	-2.38922	0.0002	0.00106912
Zm00001d050043	4:62014683-62018896	Bifunctional nuclease 2	7.07388	2.05547	-1.78303	-3.39359	5e-05	0.00031057
Zm00001d037713	6:134933416-134935896	Protein MARD1	18.1234	5.29598	-1.77489	-3.44425	5e-05	0.00031057
Zm00001d046055	9:60348292-60348643	#N/A	285.297	83.4103	-1.77417	-3.30591	5e-05	0.00031057
Zm00001d029164	1:60874572-60876557	Inactive beta-amylase 9	3.52121	1.03185	-1.77084	-1.99946	0.0025	0.00918832
Zm00001d051754	4:168916657-168926460	Aldehyde dehydrogenase, mitochondrial	297.465	87.2012	-1.7703	-5.13277	5e-05	0.00031057
Zm00001d027423	1:4909651-4914685	Protein DOWNY MILDEW RESISTANCE 6	51.8238	15.2106	-1.76854	-4.1263	5e-05	0.00031057
Zm00001d030993	1:172413966-172415265	Auxin-responsive protein IAA31	4.78416	1.40566	-1.76702	-2.06027	0.00165	0.00648017
Zm00001d037091	6:111833521-111835548	Cytochrome P450 709B2	11.7926	3.46954	-1.76507	-2.83866	5e-05	0.00031057
Zm00001d032501	1:228550972-228553155	Endonuclease 1	12.6735	3.7296	-1.76473	-2.94735	5e-05	0.00031057
Zm00001d024317	10:63998481-64015910	Protein ECERIFERUM 26-like	44.3386	13.1231	-1.75645	-3.69398	5e-05	0.00031057
Zm00001d048890	4:7209472-7214489	Acyl-coenzyme A oxidase 2, peroxisomal	25.8114	7.64178	-1.75603	-4.62332	5e-05	0.00031057
Zm00001d003677	2:53849187-53854880	Transcription factor bHLH95	183.962	54.5345	-1.75416	-5.38455	5e-05	0.00031057
Zm00001d040611	3:53767844-53777713	Homeobox protein knotted-1-like 10	17.3891	5.1772	-1.74794	-3.02744	5e-05	0.00031057
Zm00001d035455	6:26712932-26714735	Zinc finger CCCH domain-containing protein 33	59.9139	17.8556	-1.74651	-4.25896	5e-05	0.00031057
Zm00001d043986	3:215646671-215656976	Pyruvate kinase isozyme G, chloroplastic	91.6293	27.3493	-1.74431	-3.53993	5e-05	0.00031057
Zm00001d012199	8:170004526-170012968	CLP protease regulatory subunit CLPX2, mitochondrial	66.5477	19.884	-1.74278	-5.45145	5e-05	0.00031057
Zm00001d050837	4:125665546-125666545	Probable carboxylesterase 2	135.683	40.5831	-1.74129	-4.43399	5e-05	0.00031057
Zm00001d002338	2:10590636-10594877	UDP-N-acetylglucosamine diphosphorylase 2	38.0998	11.4126	-1.73915	-4.78027	5e-05	0.00031057
Zm00001d034677	1:299617923-299618295	50S ribosomal protein L30	86.0613	25.7829	-1.73895	-2.43638	0.0002	0.00106912
Zm00001d006476	2:209512507-209518574	Putative aconitate hydratase, cytoplasmic	6.42556	1.92681	-1.73761	-4.12098	5e-05	0.00031057
Zm00001d028045	1:21501809-21555136	Mannose-1-phosphate guanyltransferase alpha	29.5167	8.88033	-1.73285	-4.38335	5e-05	0.00031057
Zm00001d017866	5:209132504-209139911	Aspartyl protease family protein At5g10770	9.40106	2.83178	-1.73111	-3.34919	5e-05	0.00031057
Zm00001d001871	2:2125928-2128596	#N/A	7.32911	2.21093	-1.72899	-2.67219	5e-05	0.00031057
Zm00001d013654	5:16325464-16328605	Protein QUIRKY	31.0313	9.36363	-1.72858	-4.35085	5e-05	0.00031057
Zm00001d020752	7:131210347-131213927	Serine carboxypeptidase-like 40	92.9437	28.0535	-1.72818	-4.86284	5e-05	0.00031057
Zm00001d010758	8:127166351-127183436	Homeobox protein HOX1A	11.9782	3.61875	-1.72685	-4.84329	5e-05	0.00031057
Zm00001d025707	10:126903969-126906191	BTB/POZ and TAZ domain-containing protein 2	161.757	48.9568	-1.72424	-5.06503	5e-05	0.00031057
Zm00001d008367	8:6512707-6516786	50S ribosomal protein HLP, mitochondrial	6.60946	2.00252	-1.72272	-2.78415	5e-05	0.00031057
Zm00001d052212	4:183376752-183379650	Probable RNA-binding protein ARP1	7.00615	2.12438	-1.72158	-2.28481	0.0008	0.00353513
Zm00001d047738	9:140333667-140335716	Protein PMR5	5.84219	1.77222	-1.72095	-2.36186	0.00065	0.00296301
Zm00001d028118	1:23362247-23363688	#N/A	57.8855	17.5738	-1.71978	-3.82809	5e-05	0.00031057
Zm00001d005270	2:166551925-166562036	Probable tyrosine-protein phosphatase At1g05000	23.3783	7.11066	-1.71712	-3.35249	5e-05	0.00031057
Zm00001d015464	5:91773561-91778847	Calmodulin-binding protein 60 C	29.6371	9.02701	-1.71509	-5.02752	5e-05	0.00031057
Zm00001d021698	7:160625146-160627766	Cysteine-rich receptor-like protein kinase 10	3.65862	1.11496	-1.71431	-2.23313	0.00115	0.004782
Zm00001d008846	8:22494317-22500453	Glutamine--tRNA ligase	311.824	95.0587	-1.71384	-2.83371	5e-05	0.00031057
Zm00001d039088	6:169778444-169780307	Phospholipase A1-II 7	28.9531	8.83276	-1.71278	-3.29604	5e-05	0.00031057
Zm00001d007383	2:230345637-230366608	Alpha-mannosidase At3g26720	23.0307	7.03651	-1.71063	-4.20302	5e-05	0.00031057
Zm00001d027719	1:12103774-12105421	Uncharacterized HTH La-type RNA-binding protein C1527.03	164.42	50.2765	-1.70943	-4.81388	5e-05	0.00031057
Zm00001d037067	6:111296288-111310483	60S ribosomal protein L18a-like protein	4.19418	1.2844	-1.70729	-2.48847	0.0002	0.00106912
Zm00001d029075	1:57258182-57259499	CBL-interacting protein kinase 10	4.2491	1.30246	-1.70592	-2.99392	0.0001	0.00057936
Zm00001d037988	6:144427561-144428509	Late embryogenesis abundant protein EMB564	30.6862	9.41719	-1.70422	-3.11619	5e-05	0.00031057
Zm00001d015519	5:95546145-95556835	.	4.13983	1.27145	-1.7031	-2.31042	0.00065	0.00296301
Zm00001d029371	1:67927388-67929661	Probable trehalose-phosphate phosphatase 9	176.199	54.2021	-1.70079	-5.06472	5e-05	0.00031057
Zm00001d011834	8:162301392-162305275	Probably inactive leucine-rich repeat receptor-like protein kinase At3g28040	7.21972	2.22094	-1.70077	-3.13137	5e-05	0.00031057
Zm00001d002960	2:28153169-28153838	Alpha-amylase/subtilisin inhibitor	59.9666	18.4628	-1.69954	-2.49069	0.0002	0.00106912
Zm00001d010094	8:99105736-99112998	.	4.29099	1.32127	-1.69938	-2.37672	0.0003	0.0015276
Zm00001d032781	1:237933325-237950976	#N/A	212.745	65.682	-1.69555	-5.05005	5e-05	0.00031057
Zm00001d024672	10:83125172-83126249	U-box domain-containing protein 8	17.8201	5.50821	-1.69385	-2.39492	0.00025	0.00130155
Zm00001d011188	8:142392308-142403203	piRNA biogenesis protein EXD1	348.507	107.803	-1.69279	-5.36097	5e-05	0.00031057
Zm00001d002611	2:16718232-16722717	Copper chaperone for superoxide dismutase, chloroplastic	19.4964	6.03573	-1.69161	-3.69531	5e-05	0.00031057
Zm00001d022099	7:170256889-170257680	Nuclear transcription factor Y subunit B-8	167.27	51.7882	-1.69149	-4.48414	5e-05	0.00031057
Zm00001d037637	6:132583693-132585993	.	18.4595	5.71786	-1.69082	-2.51266	0.0002	0.00106912
Zm00001d042454	3:168343336-168345376	.	41.8202	12.9642	-1.68966	-3.30571	5e-05	0.00031057
Zm00001d022569	7:180129804-180131184	Wound-induced protein 1	155.827	48.3906	-1.68715	-4.39049	5e-05	0.00031057
Zm00001d006868	2:218291717-218297633	Peroxisomal (S)-2-hydroxy-acid oxidase GLO4	10.2393	3.18006	-1.68699	-3.34054	5e-05	0.00031057
Zm00001d035440	6:25657756-25658164	Ocs element-binding factor 1	580.191	180.837	-1.68184	-4.38153	5e-05	0.00031057
Zm00001d000038	B73V4_ctg182:474176-478548	0	25.0324	7.82796	-1.67709	-4.03566	5e-05	0.00031057
Zm00001d033983	1:280118431-280122114	Stem-specific protein TSJT1	147.951	46.2983	-1.67609	-4.77567	5e-05	0.00031057
Zm00001d053213	4:220420177-220420600	Chaperone protein dnaJ 11, chloroplastic	36.7094	11.5044	-1.67396	-2.07352	0.00205	0.0077849
Zm00001d032321	1:222201411-222202360	#N/A	6.77044	2.12727	-1.67025	-1.99727	0.00165	0.00648017
Zm00001d009177	8:41086583-41090905	Neutral/alkaline invertase 1, mitochondrial	4.51705	1.41957	-1.66993	-3.311	5e-05	0.00031057
Zm00001d003277	2:38572521-38576707	Probable galactinol--sucrose galactosyltransferase 2	19.2684	6.06591	-1.66744	-4.61558	5e-05	0.00031057
Zm00001d024610	10:80279184-80279870	#N/A	8.55414	2.69511	-1.66628	-1.97617	0.00275	0.00995302
Zm00001d032683	1:234266862-234271357	Auxin response factor 22	31.4961	9.97261	-1.65913	-4.41383	5e-05	0.00031057
Zm00001d013146	5:5414766-5415465	Photosystem I reaction center subunit III, chloroplastic	47.4617	15.0708	-1.65501	-3.1174	5e-05	0.00031057
Zm00001d041387	3:115337243-115338278	RING-H2 finger protein ATL65	47.3432	15.0443	-1.65394	-3.3174	5e-05	0.00031057
Zm00001d038883	6:166334797-166336207	Mitogen-activated protein kinase kinase kinase NPK1	8.0546	2.5679	-1.64922	-2.42642	5e-05	0.00031057
Zm00001d043787	3:210237043-210238359	Probable glutathione S-transferase GSTU6	3.95361	1.26274	-1.64662	-1.96775	0.00195	0.00746888
Zm00001d017028	5:183114966-183116706	#N/A	5.36411	1.71352	-1.64638	-2.50253	0.00025	0.00130155
Zm00001d029475	1:72345030-72345957	.	7.92226	2.53139	-1.64599	-2.12948	0.0009	0.00389168
Zm00001d033048	1:248467941-248474649	Protein TIFY 11c	32.6071	10.4189	-1.64599	-5.42835	5e-05	0.00031057
Zm00001d014983	5:71063269-71067861	Serine carboxypeptidase 3	85.4044	27.3025	-1.64528	-4.6988	5e-05	0.00031057
Zm00001d003974	2:72986094-72986979	Carboxyvinyl-carboxyphosphonate phosphorylmutase	128.823	41.1944	-1.64487	-3.67938	5e-05	0.00031057
Zm00001d029720	1:84035919-84036564	Protein PAM68, chloroplastic	60.6559	19.4337	-1.64209	-3.35301	5e-05	0.00031057
Zm00001d033155	1:252350604-252389978	DUF21 domain-containing protein At1g55930, chloroplastic	37.0657	11.883	-1.64119	-5.03688	5e-05	0.00031057
Zm00001d029923	1:94574573-94575251	14 kDa proline-rich protein DC2.15	26.3734	8.45524	-1.64117	-2.7472	5e-05	0.00031057
Zm00001d008567	8:13146140-13153362	Plastidic glucose transporter 4	126.973	40.7541	-1.63951	-5.00856	5e-05	0.00031057
Zm00001d052079	4:178764554-178775799	Alpha-aminoadipic semialdehyde synthase	106.429	34.164	-1.63934	-3.3732	5e-05	0.00031057
Zm00001d016134	5:146042172-146043738	Cytochrome b6-f complex iron-sulfur subunit, chloroplastic	107.622	34.5581	-1.63888	-4.21375	5e-05	0.00031057
Zm00001d028232	1:27413616-27420137	Superoxide dismutase [Cu-Zn] 2	36.9943	11.8813	-1.63861	-3.32918	5e-05	0.00031057
Zm00001d019541	7:41463181-41464232	.	76.1357	24.5918	-1.63039	-3.47813	5e-05	0.00031057
Zm00001d048948	4:10532758-10533688	Barwin	105.022	33.9229	-1.63037	-3.86862	5e-05	0.00031057
Zm00001d035086	6:4484146-4489968	Polyadenylate-binding protein-interacting protein 11	108.972	35.2245	-1.62931	-5.00796	5e-05	0.00031057
Zm00001d019895	7:73557447-73558196	S-norcoclaurine synthase	31.2332	10.1202	-1.62584	-2.93186	5e-05	0.00031057
Zm00001d043600	3:204844392-204848290	Ribose-phosphate pyrophosphokinase 3, chloroplastic	10.5454	3.41884	-1.62503	-3.2286	5e-05	0.00031057
Zm00001d015033	5:72855537-72858777	Phospholipase D delta	13.6694	4.4355	-1.62378	-3.31373	5e-05	0.00031057
Zm00001d014486	5:49915115-49917898	Protein HEAT-STRESS-ASSOCIATED 32	370.485	120.335	-1.62236	-4.62617	5e-05	0.00031057
Zm00001d047761	9:141194048-141214861	Two-component response regulator-like PRR73	16.3329	5.31837	-1.61873	-4.16889	5e-05	0.00031057
Zm00001d003112	2:32662029-32670568	.	22.8702	7.46302	-1.61564	-4.00146	5e-05	0.00031057
Zm00001d050320	4:81159443-81162911	Protein ECERIFERUM 26-like	6.98972	2.28154	-1.61522	-2.16996	0.0007	0.00315458
Zm00001d042494	3:169452080-169458291	Uncharacterized protein At3g49140	15.1638	4.9535	-1.61412	-4.62655	5e-05	0.00031057
Zm00001d050019	4:60068093-60069290	#N/A	8.03503	2.62562	-1.61365	-1.96145	0.0019	0.00730356
Zm00001d006336	2:204951628-204962354	#N/A	72.4838	23.6893	-1.61342	-3.38747	5e-05	0.00031057
Zm00001d028428	1:34690470-34704954	.	23.9794	7.84057	-1.61277	-3.62438	5e-05	0.00031057
Zm00001d015030	5:72784522-72786344	Pentatricopeptide repeat-containing protein At2g17033	20.9482	6.85814	-1.61094	-3.33563	5e-05	0.00031057
Zm00001d041960	3:145899088-145899865	Transcription factor BOA	19.496	6.38854	-1.60962	-2.50902	0.0003	0.0015276
Zm00001d038342	6:154871822-154875711	.	25.276	8.28405	-1.60936	-3.75632	5e-05	0.00031057
Zm00001d013755	5:19466385-19468979	Uncharacterized protein YwbO	16.379	5.36931	-1.60904	-3.4987	5e-05	0.00031057
Zm00001d006320	2:204487380-204491071	Signal peptidase complex subunit 3B	88.0901	28.8791	-1.60895	-4.32674	5e-05	0.00031057
Zm00001d019563	7:42951694-42954861	Aquaporin PIP2-1	2997.87	983.035	-1.60863	-3.88872	5e-05	0.00031057
Zm00001d029238	1:63325314-63328026	Peptide methionine sulfoxide reductase B5	14.0465	4.61609	-1.60547	-2.58829	5e-05	0.00031057
Zm00001d025680	10:126096964-126110392	PI-PLC X domain-containing protein At5g67130	18.9343	6.23489	-1.60257	-3.88724	5e-05	0.00031057
Zm00001d019573	7:43781037-43811942	CRS2-associated factor 1, chloroplastic	22.5217	7.42651	-1.60056	-4.92677	5e-05	0.00031057
Zm00001d007035	2:220605922-220606880	#N/A	8.65974	2.85583	-1.60041	-2.07082	0.0014	0.00563084
Zm00001d052720	4:198683019-198688653	Aspartic proteinase-like protein 2	3.48263	1.15154	-1.5966	-1.62179	0.00155	0.00614505
Zm00001d045381	9:20209971-20216897	DNA-repair protein XRCC1	46.9737	15.5348	-1.59635	-4.72784	5e-05	0.00031057
Zm00001d017752	5:205889940-205895577	.	18.7674	6.22474	-1.59214	-2.20136	0.00065	0.00296301
Zm00001d003349	2:41028414-41031913	Cytochrome P450 724B1	11.7582	3.90496	-1.59029	-2.80992	5e-05	0.00031057
Zm00001d006810	2:217184841-217189250	0	7.8902	2.6216	-1.58962	-2.34432	0.00245	0.00903408
Zm00001d019054	7:14302766-14311590	Methylmalonate-semialdehyde dehydrogenase [acylating], mitochondrial	163.553	54.3659	-1.58898	-5.04387	5e-05	0.00031057
Zm00001d035664	6:39874419-39878122	Outer envelope pore protein 16-1, chloroplastic	271.038	90.1445	-1.58818	-4.51038	5e-05	0.00031057
Zm00001d008403	8:7619711-7621282	NAC domain-containing protein 100	995.552	331.335	-1.5872	-4.4303	5e-05	0.00031057
Zm00001d019376	7:30724556-30745574	Probable aldehyde oxidase 4	22.1555	7.37438	-1.58707	-4.86774	5e-05	0.00031057
Zm00001d010610	8:121822414-121825887	WEB family protein At2g38370	20.9873	6.9899	-1.58618	-4.14296	5e-05	0.00031057
Zm00001d017713	5:205042878-205045991	Protein NRT1/ PTR FAMILY 8.3	4.05965	1.35307	-1.58512	-2.15327	0.00105	0.00442562
Zm00001d008898	8:24390469-24391888	Peroxidase 4	188.868	63.188	-1.57966	-4.45254	5e-05	0.00031057
Zm00001d041972	3:146279424-146282802	Cellulose synthase-like protein G2	4.88287	1.63914	-1.5748	-2.27895	0.0004	0.00196604
Zm00001d020986	7:139367276-139370608	.	23.7292	7.96797	-1.57438	-4.35618	5e-05	0.00031057
Zm00001d005616	2:180790190-180792445	.	3.25982	1.09639	-1.57203	-2.42336	0.00075	0.00334812
Zm00001d043510	3:202337386-202341138	.	7.90953	2.66256	-1.57078	-2.57978	0.00015	0.000830091
Zm00001d013295	5:7990162-7991833	.	18.9609	6.38323	-1.57067	-3.05669	5e-05	0.00031057
Zm00001d042504	3:169713521-169717584	Patatin-like protein 2	105.67	35.5768	-1.57056	-4.04507	5e-05	0.00031057
Zm00001d052266	4:185249434-185254161	Methyltransferase-like protein 7A	4.4973	1.51448	-1.57024	-2.14541	0.00095	0.00406591
Zm00001d017334	5:193209945-193222922	Protein PEROXIN-4	14.5179	4.89105	-1.56962	-3.05154	5e-05	0.00031057
Zm00001d009783	8:80843264-80852115	DnaJ protein ERDJ3B	62.0029	20.924	-1.56718	-4.72641	5e-05	0.00031057
Zm00001d025182	10:108128002-108131484	Protein XRI1	10.2228	3.45221	-1.5662	-3.30919	5e-05	0.00031057
Zm00001d025616	10:124037256-124039095	30S ribosomal protein 3, chloroplastic	51.6441	17.4519	-1.56522	-3.49355	5e-05	0.00031057
Zm00001d039264	3:767083-768838	D-amino-acid transaminase, chloroplastic	81.2646	27.4627	-1.56516	-4.09497	5e-05	0.00031057
Zm00001d047462	9:130897730-130901561	50S ribosomal protein L6, chloroplastic	48.9049	16.5346	-1.56449	-3.9315	5e-05	0.00031057
Zm00001d031893	1:205617822-205620362	BAHD acyltransferase DCR	27.2492	9.22737	-1.56222	-3.43246	5e-05	0.00031057
Zm00001d051967	4:175609306-175611318	SAP-like protein BP-73	14.059	4.76255	-1.56168	-3.69371	5e-05	0.00031057
Zm00001d014491	5:50064947-50065346	Calcium-binding protein KIC	52.5827	17.8495	-1.55871	-2.19224	0.00125	0.00511616
Zm00001d036125	6:73478013-73479134	Early nodulin-93	5761.83	1959.29	-1.55619	-3.68049	5e-05	0.00031057
Zm00001d035974	6:63764139-63769331	Chaperone protein dnaJ GFA2, mitochondrial	40.1206	13.644	-1.55608	-4.45977	5e-05	0.00031057
Zm00001d015905	5:130027453-130030346	Bidirectional sugar transporter SWEET4	12.6991	4.3208	-1.55536	-2.56497	5e-05	0.00031057
Zm00001d004036	2:77705737-77717321	Protein XRI1	3.68408	1.25638	-1.55203	-2.44168	5e-05	0.00031057
Zm00001d002814	2:23462896-23484612	NAD(P)H-quinone oxidoreductase subunit M, chloroplastic	9.79182	3.36106	-1.54266	-2.14823	0.00085	0.00371002
Zm00001d033750	1:272770259-272780685	Threonine dehydratase biosynthetic, chloroplastic	74.7434	25.7285	-1.53858	-5.02336	5e-05	0.00031057
Zm00001d035747	6:44780802-44789355	Protein argonaute 1	64.4538	22.1896	-1.53838	-4.80934	5e-05	0.00031057
Zm00001d021667	7:159561271-159563354	Probable xyloglucan endotransglucosylase/hydrolase protein 8	58.7576	20.2371	-1.53778	-3.84885	5e-05	0.00031057
Zm00001d022434	7:177646175-177649676	Serine/threonine-protein kinase AtPK2/AtPK19	64.5041	22.2344	-1.5366	-4.70403	5e-05	0.00031057
Zm00001d032754	1:237444153-237451532	WD repeat-containing protein 26	8.75539	3.0194	-1.53591	-3.49158	5e-05	0.00031057
Zm00001d036283	6:81809427-81812765	.	131.65	45.4109	-1.5356	-4.41978	5e-05	0.00031057
Zm00001d031570	1:194692156-194696937	.	124.031	42.8572	-1.5331	-4.76888	5e-05	0.00031057
Zm00001d033077	1:249770155-249771444	Membrane metalloprotease ARASP, chloroplastic	7.65967	2.64671	-1.53308	-1.98576	0.00215	0.00809985
Zm00001d027319	1:2869706-2878262	4'-phosphopantetheinyl transferase HetI	17.994	6.21822	-1.53294	-3.75626	5e-05	0.00031057
Zm00001d031024	1:174046269-174052289	Thiosulfate/3-mercaptopyruvate sulfurtransferase 1, mitochondrial	168.732	58.3458	-1.53203	-4.79088	5e-05	0.00031057
Zm00001d049764	4:43697590-43702964	.	66.3906	23.0023	-1.5292	-4.75985	5e-05	0.00031057
Zm00001d049380	4:28422056-28429977	Probable gamma-aminobutyrate transaminase 3, mitochondrial	18.563	6.43376	-1.5287	-2.81319	5e-05	0.00031057
Zm00001d029630	1:80665245-80665596	Cysteine proteinase inhibitor 8	262.79	91.1966	-1.52686	-2.69987	5e-05	0.00031057
Zm00001d003379	2:42234464-42235544	MLP-like protein 423	526.462	182.719	-1.5267	-4.66817	5e-05	0.00031057
Zm00001d019727	7:54088915-54093193	Serine/threonine-protein kinase CDL1	15.7719	5.47396	-1.5267	-2.5062	5e-05	0.00031057
Zm00001d032386	1:225026375-225031085	Pyrophosphate--fructose 6-phosphate 1-phosphotransferase subunit alpha	594.53	206.434	-1.52607	-4.02026	5e-05	0.00031057
Zm00001d024339	10:65518389-65532891	YTH domain-containing family protein 1	98.0083	34.0454	-1.52545	-3.11867	5e-05	0.00031057
Zm00001d021843	7:164343315-164343884	Defensin-like protein	9066.68	3153.03	-1.52383	-3.99468	5e-05	0.00031057
Zm00001d002157	2:6883710-6885633	Pentatricopeptide repeat-containing protein At1g03560, mitochondrial	5.14705	1.79087	-1.52309	-2.6323	0.0001	0.00057936
Zm00001d005442	2:174337142-174340895	Ankyrin repeat domain-containing protein 13B	19.2062	6.6841	-1.52277	-4.00402	5e-05	0.00031057
Zm00001d033925	1:278704406-278706905	CBS domain-containing protein CBSX3, mitochondrial	19.755	6.88125	-1.52148	-3.66538	5e-05	0.00031057
Zm00001d004977	2:151850326-151853942	Cytochrome c-type biogenesis ccda-like chloroplastic protein 2	2.99632	1.04393	-1.52117	-1.92952	0.002	0.00763302
Zm00001d036598	6:94023964-94028647	Geranylgeranyl transferase type-2 subunit alpha 1	4.46462	1.558	-1.51885	-3.19128	5e-05	0.00031057
Zm00001d032974	1:245150814-245172358	Probable prolyl 4-hydroxylase 7	113.619	39.6533	-1.51869	-2.62381	5e-05	0.00031057
Zm00001d016922	5:180066186-180076054	#N/A	22.5077	7.85654	-1.51845	-3.68912	5e-05	0.00031057
Zm00001d042976	3:185594409-185595216	.	120.311	42.0152	-1.51778	-3.70424	5e-05	0.00031057
Zm00001d012869	5:1375910-1397930	Shaggy-related protein kinase kappa	34.267	11.9689	-1.51753	-4.19655	5e-05	0.00031057
Zm00001d013107	5:4767908-4771878	E3 ubiquitin-protein ligase RHF2A	65.9868	23.0492	-1.51746	-2.77618	5e-05	0.00031057
Zm00001d026096	10:138350500-138351571	Dof zinc finger protein DOF4.6	8.14275	2.84624	-1.51646	-1.97236	0.00225	0.00841279
Zm00001d018781	7:5083803-5085903	Reticulon-like protein B8	9.17881	3.21024	-1.51563	-2.10634	0.0011	0.00460096
Zm00001d032790	1:238206822-238227886	.	19.7631	6.91437	-1.51514	-4.71904	5e-05	0.00031057
Zm00001d047739	9:140341311-140361205	Phosphoinositide phosphatase SAC8	17.4477	6.11017	-1.51375	-3.98408	5e-05	0.00031057
Zm00001d002012	2:4325835-4336209	Protein KAKU4	3.19705	1.12032	-1.51282	-2.30664	0.0002	0.00106912
Zm00001d002128	2:6409518-6412809	Shikimate kinase 3, chloroplastic	201.717	70.8359	-1.50978	-4.21468	5e-05	0.00031057
Zm00001d021777	7:162864816-162867072	.	6.74165	2.36887	-1.50891	-2.20562	0.0002	0.00106912
Zm00001d039039	6:169026420-169029775	Cold-regulated 413 inner membrane protein 2, chloroplastic	89.8207	31.5782	-1.50812	-3.97537	5e-05	0.00031057
Zm00001d029762	1:86130013-86134531	Monosaccharide-sensing protein 2	131.49	46.2435	-1.50763	-4.48481	5e-05	0.00031057
Zm00001d045550	9:26527594-26531578	Pentatricopeptide repeat-containing protein At5g27270	12.9931	4.5729	-1.50657	-3.40585	5e-05	0.00031057
Zm00001d022628	7:181720256-181728090	Myb-related protein Hv1	4.21248	1.48356	-1.5056	-2.17853	0.0009	0.00389168
Zm00001d027349	1:3443597-3446350	Pentatricopeptide repeat-containing protein At3g53170	4.76372	1.67941	-1.50414	-2.96371	5e-05	0.00031057
Zm00001d034898	1:305074530-305075830	Gibberellin 20 oxidase 1-B	19.3394	6.82107	-1.50347	-2.71382	0.0001	0.00057936
Zm00001d039771	3:14423055-14424523	#N/A	297.039	104.837	-1.5025	-4.36122	5e-05	0.00031057
Zm00001d032955	1:244544977-244546492	.	129.704	45.838	-1.50061	-4.21522	5e-05	0.00031057
Zm00001d028071	1:21979235-21982123	FAD-linked sulfhydryl oxidase ERV1	131.04	46.32	-1.5003	-4.30405	5e-05	0.00031057
Zm00001d042555	3:171667232-171670207	2-alkenal reductase (NADP(+)-dependent)	11.5991	4.10131	-1.49986	-3.03994	5e-05	0.00031057
Zm00001d011185	8:142292768-142293158	Protein transport protein Sec61 subunit beta	370.937	131.249	-1.49887	-3.51039	5e-05	0.00031057
Zm00001d033612	1:268595954-268596485	Oleosin Zm-II	279.65	98.9493	-1.49886	-3.94264	5e-05	0.00031057
Zm00001d048090	9:149896359-149911347	Probable inactive purple acid phosphatase 1	15.8201	5.6001	-1.49823	-3.0875	5e-05	0.00031057
Zm00001d040567	3:50460158-50465139	CBL-interacting protein kinase 1	80.2655	28.416	-1.49808	-4.58067	5e-05	0.00031057
Zm00001d054070	4:245864832-245876851	Lysine-specific demethylase JMJ25	54.0053	19.1249	-1.49765	-2.75921	5e-05	0.00031057
Zm00001d009709	8:77053962-77055849	Probable WRKY transcription factor 19	57.776	20.4649	-1.49732	-4.12274	5e-05	0.00031057
Zm00001d036343	6:85011738-85018649	#N/A	14.4331	5.11323	-1.49707	-3.24884	5e-05	0.00031057
Zm00001d033606	1:268494768-268498124	Protein yippee-like	24.321	8.62038	-1.49638	-3.21691	5e-05	0.00031057
Zm00001d042572	3:172341374-172341728	#N/A	225.238	79.8725	-1.49568	-2.52711	5e-05	0.00031057
Zm00001d013053	5:3891201-3893064	Probable prolyl 4-hydroxylase 7	35.876	12.7243	-1.49543	-3.37224	5e-05	0.00031057
Zm00001d053378	4:228397960-228399787	#N/A	67.1615	23.8282	-1.49496	-4.48333	5e-05	0.00031057
Zm00001d037170	6:114741697-114745764	ABSCISIC ACID-INSENSITIVE 5-like protein 5	5.06655	1.79861	-1.49412	-2.16013	0.00125	0.00511616
Zm00001d037714	6:134992107-134994036	.	7.31376	2.59659	-1.49399	-1.97302	0.0022	0.00825909
Zm00001d009660	8:74951344-74955026	Serine/threonine-protein kinase STY8	84.8904	30.1406	-1.4939	-4.60267	5e-05	0.00031057
Zm00001d001806	2:1258168-1262749	Endonuclease MutS2	3.91315	1.38955	-1.49371	-3.14825	5e-05	0.00031057
Zm00001d027742	1:12448969-12449458	#N/A	40.0656	14.2316	-1.49327	-2.28857	0.00035	0.00174885
Zm00001d044129	3:219979957-219989574	Glucose-1-phosphate adenylyltransferase large subunit, chloroplastic/amyloplastic (Fragment)	2905.3	1033.65	-1.49094	-2.56293	0.00025	0.00130155
Zm00001d012709	8:179050886-179052423	.	150.986	53.7524	-1.49001	-4.58128	5e-05	0.00031057
Zm00001d028714	1:44013641-44016256	Probable RNA-binding protein ARP1	322.881	115.06	-1.48861	-4.30432	5e-05	0.00031057
Zm00001d004655	2:126652986-126654733	ER lumen protein-retaining receptor	59.8132	21.3223	-1.4881	-4.0013	5e-05	0.00031057
Zm00001d028344	1:31351457-31356305	Metal tolerance protein 4	5.48905	1.95825	-1.48699	-2.69749	5e-05	0.00031057
Zm00001d020909	7:136246207-136247296	JmjC domain-containing protein 7	12.5135	4.46509	-1.48672	-2.20233	0.0003	0.0015276
Zm00001d020426	7:113230395-113233416	Dihydrolipoyllysine-residue acetyltransferase component 4 of pyruvate dehydrogenase complex, chloroplastic	10.7622	3.85018	-1.48298	-3.02451	5e-05	0.00031057
Zm00001d013012	5:3197351-3202002	.	61.8369	22.1312	-1.48238	-4.7388	5e-05	0.00031057
Zm00001d041308	3:111434916-111440097	K(+) efflux antiporter 3, chloroplastic	2.85366	1.02191	-1.48154	-2.44057	0.00025	0.00130155
Zm00001d039324	3:1876336-1877401	Ethylene-responsive transcription factor CRF2	13.8902	4.98672	-1.4779	-2.145	0.0007	0.00315458
Zm00001d007069	2:221364842-221370428	NudC domain-containing protein 2	50.5438	18.2129	-1.47257	-3.34066	5e-05	0.00031057
Zm00001d013725	5:18631980-18633840	Naringenin,2-oxoglutarate 3-dioxygenase	255.268	92.1277	-1.47031	-4.29851	5e-05	0.00031057
Zm00001d027649	1:10105589-10109563	E3 ubiquitin-protein ligase MIEL1	25.0925	9.05799	-1.46999	-3.36451	5e-05	0.00031057
Zm00001d047681	9:139142382-139155181	Pentatricopeptide repeat-containing protein At5g50990	5.54008	2.00173	-1.46866	-3.42051	5e-05	0.00031057
Zm00001d019809	7:63692696-63694418	.	7.49911	2.71054	-1.46814	-2.60965	0.0001	0.00057936
Zm00001d017604	5:201364587-201367782	Rho GTPase-activating protein 3	6.48798	2.34582	-1.46768	-2.90193	5e-05	0.00031057
Zm00001d012929	5:2166711-2169144	Calmodulin-binding receptor-like cytoplasmic kinase 2	7.59214	2.7455	-1.46744	-2.56817	5e-05	0.00031057
Zm00001d031908	1:206405715-206408991	Superoxide dismutase [Cu-Zn], chloroplastic	104.505	37.7931	-1.46738	-4.16485	5e-05	0.00031057
Zm00001d003941	2:70598354-70604588	Probable metal-nicotianamine transporter YSL6	92.413	33.4334	-1.4668	-4.56819	5e-05	0.00031057
Zm00001d029697	1:83036894-83045156	Succinate dehydrogenase assembly factor 1A, mitochondrial	5.34804	1.9385	-1.46407	-1.68886	0.00135	0.00545852
Zm00001d002625	2:17149610-17153983	Probable methyltransferase PMT15	20.279	7.351	-1.46397	-3.48841	5e-05	0.00031057
Zm00001d032556	1:230440138-230441090	Putative ribosomal-protein-alanine acetyltransferase	19.1927	6.96172	-1.46304	-2.47196	0.00015	0.000830091
Zm00001d001996	2:4127516-4130914	#N/A	41.4975	15.0534	-1.46294	-2.96624	5e-05	0.00031057
Zm00001d020040	7:87960470-87966086	Lipid phosphate phosphatase 2	4.89778	1.77878	-1.46124	-2.47833	0.0001	0.00057936
Zm00001d020492	7:118720425-118722244	WRKY transcription factor WRKY76	18.8495	6.84856	-1.46065	-3.22973	5e-05	0.00031057
Zm00001d052803	4:201411027-201419311	Serine/arginine-rich splicing factor SC35	76.1585	27.6732	-1.46052	-3.83321	5e-05	0.00031057
Zm00001d044176	3:221180361-221181917	#N/A	15.4273	5.60772	-1.46	-2.50535	0.00015	0.000830091
Zm00001d045618	9:28912538-28913902	Bax inhibitor 1	88.4989	32.1696	-1.45996	-3.87441	5e-05	0.00031057
Zm00001d004167	2:88547086-88552834	Isoflavone 2'-hydroxylase	8.86552	3.2229	-1.45985	-2.60558	0.0002	0.00106912
Zm00001d018326	5:218492797-218493868	Mitogen-activated protein kinase kinase 5	8.98359	3.2678	-1.45897	-2.00065	0.00195	0.00746888
Zm00001d039349	3:2346496-2358180	.	11.9941	4.36535	-1.45815	-3.23706	5e-05	0.00031057
Zm00001d034196	1:286308026-286310892	Cytochrome c biogenesis protein CCS1, chloroplastic	8.61101	3.13565	-1.45742	-3.02963	5e-05	0.00031057
Zm00001d021494	7:154089911-154092986	FT-interacting protein 1	19.4552	7.09016	-1.45627	-3.80854	5e-05	0.00031057
Zm00001d041287	3:110465001-110469594	#N/A	23.7605	8.66047	-1.45604	-4.24724	5e-05	0.00031057
Zm00001d006608	2:212460727-212464470	.	13.6709	4.9883	-1.45448	-2.47384	0.0001	0.00057936
Zm00001d013595	5:15089494-15092540	Protein MARD1	34.4528	12.5748	-1.45409	-3.22055	5e-05	0.00031057
Zm00001d010368	8:111481666-111489438	Derlin-1.1	38.5814	14.1053	-1.45167	-4.061	5e-05	0.00031057
Zm00001d041957	3:145604149-145607293	Protein FIZZY-RELATED 3	6.39416	2.34065	-1.44985	-2.05285	0.0006	0.00276399
Zm00001d049441	4:30362044-30373591	Glucose-6-phosphate/phosphate translocator 2, chloroplastic	35.5364	13.0253	-1.44799	-4.24015	5e-05	0.00031057
Zm00001d009797	8:81867263-81868166	.	340.965	124.992	-1.44779	-4.27991	5e-05	0.00031057
Zm00001d012459	8:174876308-174878746	Probable phytol kinase 2, chloroplastic	21.354	7.8298	-1.44746	-3.22457	5e-05	0.00031057
Zm00001d028257	1:28103033-28104556	#N/A	58.9095	21.6002	-1.44746	-2.91971	5e-05	0.00031057
Zm00001d003958	2:72202913-72211422	Calmodulin-binding transcription activator 4	4.52932	1.66218	-1.44622	-3.59822	5e-05	0.00031057
Zm00001d041049	3:92907262-92913722	E3 ubiquitin-protein ligase SINA-like 10	5.80605	2.13425	-1.44383	-2.50769	0.0001	0.00057936
Zm00001d034838	1:303465802-303469125	Arginine decarboxylase	5.61295	2.06452	-1.44296	-2.9323	5e-05	0.00031057
Zm00001d007709	2:237903356-237908436	Probable E3 ubiquitin-protein ligase ARI7	36.8032	13.5453	-1.44204	-4.19604	5e-05	0.00031057
Zm00001d014200	5:36213526-36214422	.	9.81685	3.61388	-1.44171	-2.08107	0.00125	0.00511616
Zm00001d003710	2:55847267-55852437	Protein SET DOMAIN GROUP 41	6.63421	2.44298	-1.44128	-3.1639	5e-05	0.00031057
Zm00001d053886	4:242972196-242981389	L-arabinokinase	8.00456	2.94785	-1.44116	-3.275	5e-05	0.00031057
Zm00001d007091	2:222100777-222102412	Cis-zeatin O-glucosyltransferase 1	22.1144	8.14416	-1.44115	-2.65971	5e-05	0.00031057
Zm00001d026244	10:141740262-141743415	Spermidine-binding periplasmic protein SpuE	9.9927	3.68033	-1.44104	-3.10854	5e-05	0.00031057
Zm00001d042653	3:175440564-175443093	DnaJ homolog subfamily B member 13	186.183	68.8023	-1.43619	-4.21779	5e-05	0.00031057
Zm00001d032472	1:227853797-227862240	Probable serine protease EDA2	29.3588	10.8538	-1.43559	-3.10628	5e-05	0.00031057
Zm00001d017885	5:209614259-209620254	Zinc finger protein CONSTANS-LIKE 10	10.134	3.74951	-1.43443	-3.40813	5e-05	0.00031057
Zm00001d049094	4:15846667-15849827	B3 domain-containing protein Os11g0197600	8.21653	3.04016	-1.43438	-2.74875	5e-05	0.00031057
Zm00001d003864	2:63709238-63723748	Sucrose nonfermenting 4-like protein	25.1753	9.31752	-1.43399	-3.14761	5e-05	0.00031057
Zm00001d022367	7:176185595-176188604	Beta-glucosidase 26	10.592	3.92276	-1.43303	-2.71087	5e-05	0.00031057
Zm00001d006750	2:215851863-215862377	.	991.875	367.361	-1.43296	-3.94996	5e-05	0.00031057
Zm00001d048293	9:154011331-154012566	Solute carrier family 25 member 44	17.3895	6.44443	-1.43209	-2.39344	5e-05	0.00031057
Zm00001d014889	5:67036357-67037769	.	10.8892	4.03575	-1.43199	-2.23116	0.00065	0.00296301
Zm00001d031300	1:185589045-185592963	Probable galactinol--sucrose galactosyltransferase 1	14.1263	5.23547	-1.43199	-3.25366	5e-05	0.00031057
Zm00001d023718	10:16725272-16728563	Probable indole-3-pyruvate monooxygenase YUCCA11	145.419	53.9235	-1.43123	-4.00502	5e-05	0.00031057
Zm00001d013250	5:7116920-7125593	PLASMODESMATA CALLOSE-BINDING PROTEIN 3	322.717	119.689	-1.43098	-4.35856	5e-05	0.00031057
Zm00001d008222	8:1660930-1663039	#N/A	13.3994	4.97239	-1.43016	-2.62757	0.0001	0.00057936
Zm00001d043374	3:198030696-198033316	Protein NRT1/ PTR FAMILY 1.2	4.55559	1.6907	-1.43002	-2.1699	0.0006	0.00276399
Zm00001d047749	9:140823446-140828462	.	17.468	6.48382	-1.4298	-3.70925	5e-05	0.00031057
Zm00001d038352	6:155011566-155014793	#N/A	7.37977	2.74019	-1.4293	-2.2573	0.00035	0.00174885
Zm00001d047074	9:117367858-117454573	Vacuolar protein sorting-associated protein 13	59.0202	21.9237	-1.42872	-3.33529	5e-05	0.00031057
Zm00001d043231	3:192587491-192592698	Homeobox-leucine zipper protein TF1	4.08745	1.51992	-1.4272	-2.58024	5e-05	0.00031057
Zm00001d029134	1:59846903-59876808	.	20.8356	7.74913	-1.42694	-4.66489	5e-05	0.00031057
Zm00001d051044	4:138472339-138473695	Protein PIN-LIKES 2	57.6751	21.4683	-1.42574	-3.84931	5e-05	0.00031057
Zm00001d047833	9:142784492-142792921	Serine/threonine-protein kinase ATG1c	17.9724	6.69454	-1.42472	-3.99297	5e-05	0.00031057
Zm00001d036839	6:103351536-103352681	.	187.482	69.9019	-1.42335	-4.01008	5e-05	0.00031057
Zm00001d024876	10:91818585-91820109	.	69.6064	25.9576	-1.42306	-4.28189	5e-05	0.00031057
Zm00001d017953	5:210785281-210790516	Probable peroxygenase 4	47.0392	17.5725	-1.42054	-3.4631	5e-05	0.00031057
Zm00001d027875	1:16140363-16141359	Solute carrier family 25 member 44	17.0798	6.38235	-1.42013	-2.13803	0.0004	0.00196604
Zm00001d016640	5:170975263-170982646	Ribonuclease TUDOR 1	263.098	98.6001	-1.41594	-3.73224	5e-05	0.00031057
Zm00001d050606	4:103706599-103714666	Ribonuclease TUDOR 1	305.359	114.441	-1.4159	-3.5983	5e-05	0.00031057
Zm00001d018946	7:10194257-10196282	Phosphopantetheine adenylyltransferase 1	11.5922	4.34831	-1.41462	-2.81331	5e-05	0.00031057
Zm00001d006057	2:196697373-196700761	.	11.279	4.23409	-1.41352	-3.24311	5e-05	0.00031057
Zm00001d002685	2:19212993-19214316	Thioredoxin-like 3-3	14.9501	5.61541	-1.41269	-2.15387	0.0005	0.00237556
Zm00001d031635	1:196944232-196947143	Peroxidase 51	349.998	131.74	-1.40966	-4.38377	5e-05	0.00031057
Zm00001d037333	6:121792418-121824947	D-tagatose-1,6-bisphosphate aldolase subunit GatY	40.5508	15.317	-1.40459	-4.53828	5e-05	0.00031057
Zm00001d003017	2:29552167-29562830	Adenosine kinase 2	19.3089	7.30199	-1.4029	-3.46703	5e-05	0.00031057
Zm00001d004644	2:124805299-124818947	#N/A	16.2161	6.14098	-1.40088	-2.266	0.0005	0.00237556
Zm00001d007118	2:222719141-222722663	V-type proton ATPase subunit F	100.559	38.096	-1.40034	-3.79412	5e-05	0.00031057
Zm00001d009557	8:70051210-70051921	.	18.0046	6.82294	-1.3999	-2.1162	0.00095	0.00406591
Zm00001d054049	4:245578688-245585798	.	12.7201	4.82075	-1.39977	-1.80897	0.0011	0.00460096
Zm00001d013035	5:3537737-3542307	Cycloartenol-C-24-methyltransferase 1	4.85224	1.84096	-1.39819	-2.26255	5e-05	0.00031057
Zm00001d042090	3:150298205-150301300	Uridine 5'-monophosphate synthase	17.0063	6.45485	-1.39761	-2.02488	0.00075	0.00334812
Zm00001d038163	6:150024485-150035717	Pyruvate, phosphate dikinase 1, chloroplastic	1240.37	470.813	-1.39754	-2.73928	5e-05	0.00031057
Zm00001d026289	10:142956462-142961794	Probable potassium transporter 11	4.28296	1.62755	-1.39591	-2.69493	5e-05	0.00031057
Zm00001d019356	7:29463118-29465998	Putative disease resistance RPP13-like protein 1	3.25095	1.23549	-1.39578	-2.25617	0.0001	0.00057936
Zm00001d000418	B73V4_ctg121:28927-30307	0	1221.49	464.836	-1.39385	-3.97433	5e-05	0.00031057
Zm00001d042973	3:185491095-185495066	Protein IQ-DOMAIN 1	190.436	72.5015	-1.39323	-4.26695	5e-05	0.00031057
Zm00001d053351	4:227178839-227181299	Nuclear ribonuclease Z	5.73102	2.1844	-1.39156	-2.32802	0.0009	0.00389168
Zm00001d048065	9:149248148-149254231	Tubulin alpha-2 chain	145.926	55.6301	-1.3913	-4.21848	5e-05	0.00031057
Zm00001d015589	5:100023066-100024804	Premnaspirodiene oxygenase	6.89048	2.62923	-1.38996	-2.16604	0.0009	0.00389168
Zm00001d012173	8:169516095-169525048	Fructokinase-1	28.6431	10.9349	-1.38924	-3.20331	5e-05	0.00031057
Zm00001d052191	4:182743278-182744379	Blue copper protein	9.66237	3.69247	-1.38779	-2.00903	0.0015	0.00597343
Zm00001d043782	3:210069088-210070258	AP2/ERF and B3 domain-containing protein Os01g0693400	79.6159	30.4342	-1.38736	-3.51114	5e-05	0.00031057
Zm00001d004123	2:84344352-84356520	Lactoylglutathione lyase	50.1891	19.1885	-1.38714	-4.16986	5e-05	0.00031057
Zm00001d033053	1:248744038-248745469	Molybdate transporter 1	67.1871	25.6945	-1.38672	-3.70303	5e-05	0.00031057
Zm00001d051138	4:145541888-145545820	Glycolipid transfer protein 1	15.5621	5.95143	-1.38672	-3.06291	5e-05	0.00031057
Zm00001d026135	10:139371671-139375601	Mechanosensitive ion channel protein 8	5.29787	2.02665	-1.38632	-2.57632	5e-05	0.00031057
Zm00001d043390	3:198588277-198589171	Protein DOG1-like 3	223.419	85.4745	-1.38619	-3.96384	5e-05	0.00031057
Zm00001d006612	2:212559035-212559383	#N/A	119.478	45.823	-1.3826	-1.96574	0.00165	0.00648017
Zm00001d035817	6:52272150-52289829	Serine/threonine-protein kinase STY8	53.2117	20.4169	-1.38198	-4.50322	5e-05	0.00031057
Zm00001d013872	5:23508953-23534887	#N/A	4.53144	1.73975	-1.38109	-1.9685	0.0008	0.00353513
Zm00001d043573	3:204250551-204255894	#N/A	14.6224	5.61712	-1.38027	-3.33681	5e-05	0.00031057
Zm00001d006199	2:201505640-201507497	Cytochrome P450 71A1	5.88261	2.26058	-1.37976	-2.19964	0.0005	0.00237556
Zm00001d014460	5:48329373-48332335	Putative serine/threonine-protein kinase-like protein CCR3	6.14785	2.36424	-1.37871	-2.99941	5e-05	0.00031057
Zm00001d033190	1:253289650-253294311	#N/A	14.5904	5.61249	-1.3783	-2.31432	0.0003	0.0015276
Zm00001d031660	1:197840679-197849444	#N/A	39.4678	15.2142	-1.37525	-4.3336	5e-05	0.00031057
Zm00001d037529	6:128190262-128195748	Increased DNA methylation 1	62.8152	24.2418	-1.37362	-4.16134	5e-05	0.00031057
Zm00001d002630	2:17337399-17339739	.	168.886	65.2288	-1.37247	-3.79128	5e-05	0.00031057
Zm00001d042444	3:167655967-167659163	TBC1 domain family member 13	5.3113	2.05185	-1.37214	-2.55905	0.00015	0.000830091
Zm00001d049099	4:15973747-15978441	Protein disulfide-isomerase	1636.24	632.806	-1.37055	-2.86005	5e-05	0.00031057
Zm00001d025799	10:129941665-129946475	Calmodulin-binding receptor-like cytoplasmic kinase 3	29.5625	11.4372	-1.37004	-4.15731	5e-05	0.00031057
Zm00001d044648	3:233938894-233949832	Alpha-L-arabinofuranosidase 1	13.5704	5.25018	-1.37002	-3.10982	5e-05	0.00031057
Zm00001d052310	4:186760769-186762839	Probable phytol kinase 2, chloroplastic	7.2164	2.79581	-1.36801	-2.30822	0.0004	0.00196604
Zm00001d033558	1:267132150-267137221	Tetratricopeptide repeat protein 38	15.1156	5.85801	-1.36756	-3.54747	5e-05	0.00031057
Zm00001d028905	1:50443215-50455013	Phytochrome B	13.2699	5.14368	-1.36728	-4.08404	5e-05	0.00031057
Zm00001d013736	5:18918645-18921698	Serine/threonine-protein kinase SAPK10	161.412	62.5794	-1.36699	-4.31592	5e-05	0.00031057
Zm00001d013801	5:20673283-20676096	Transcription factor GAMYB	65.2795	25.3241	-1.36612	-3.71881	5e-05	0.00031057
Zm00001d005456	2:174866937-174869050	DIMBOA UDP-glucosyltransferase BX9	5.40079	2.09561	-1.3658	-2.11878	0.00095	0.00406591
Zm00001d014482	5:49749760-49762625	.	3.1449	1.22135	-1.36454	-2.08282	0.0006	0.00276399
Zm00001d039498	3:6001072-6005346	Serine/threonine-protein kinase Aurora-1	7.76261	3.01583	-1.36398	-2.66588	5e-05	0.00031057
Zm00001d014159	5:34485904-34495039	Protein NETWORKED 1D	27.0226	10.5008	-1.36366	-4.58134	5e-05	0.00031057
Zm00001d012338	8:172708663-172712351	Coronatine-insensitive protein homolog 1a	41.475	16.1265	-1.36281	-3.90148	5e-05	0.00031057
Zm00001d019764	7:57843138-57844509	.	12.9267	5.02711	-1.36256	-2.45461	0.00015	0.000830091
Zm00001d003822	2:60917099-60919425	DNA-binding protein S1FA2	98.5376	38.378	-1.3604	-3.86528	5e-05	0.00031057
Zm00001d005620	2:180837843-180839608	UDP-glycosyltransferase 82A1	9.97738	3.89038	-1.35875	-2.20534	0.0007	0.00315458
Zm00001d012979	5:2666356-2692291	Pyruvate decarboxylase 2	82.9999	32.3772	-1.35813	-2.63885	5e-05	0.00031057
Zm00001d018971	7:11075376-11078232	Regulatory protein opaque-2	354.091	138.139	-1.358	-4.11775	5e-05	0.00031057
Zm00001d021730	7:161604313-161605162	Universal stress protein PHOS34	92.2451	36.0424	-1.35578	-3.21126	5e-05	0.00031057
Zm00001d044293	3:224412719-224415754	U-box domain-containing protein 33	5.00496	1.95725	-1.35453	-1.33356	5e-05	0.00031057
Zm00001d036238	6:78463988-78465795	GDSL esterase/lipase At1g28570	62.2891	24.3781	-1.35339	-3.2533	5e-05	0.00031057
Zm00001d037307	6:120259267-120263325	.	118.003	46.2002	-1.35285	-4.20854	5e-05	0.00031057
Zm00001d034871	1:304367514-304374498	Derlin-2.2	64.5047	25.2618	-1.35245	-4.0141	5e-05	0.00031057
Zm00001d009983	8:93324375-93339948	.	10.9013	4.27576	-1.35025	-3.10831	5e-05	0.00031057
Zm00001d024171	10:52662144-52669708	Mitochondrial import inner membrane translocase subunit TIM14-1	8.50426	3.33945	-1.34858	-2.45188	0.00025	0.00130155
Zm00001d039015	6:168716950-168722841	.	37.4166	14.6962	-1.34824	-3.50974	5e-05	0.00031057
Zm00001d034805	1:302475600-302480366	Translocation protein SEC62	133.444	52.4308	-1.34775	-4.33697	5e-05	0.00031057
Zm00001d042637	3:174787066-174792369	Receptor-like protein kinase HSL1	2.6718	1.05065	-1.34653	-2.65253	0.0001	0.00057936
Zm00001d051345	4:155274021-155300046	Ceramide kinase	6.95678	2.73691	-1.34587	-3.15179	5e-05	0.00031057
Zm00001d040163	3:29846485-29852954	1-deoxy-D-xylulose 5-phosphate reductoisomerase, chloroplastic	8.23482	3.24147	-1.34509	-2.91501	5e-05	0.00031057
Zm00001d034604	1:297614825-297618473	KH domain-containing protein SPIN1	23.0181	9.06419	-1.34452	-3.33656	5e-05	0.00031057
Zm00001d044090	3:218825199-218829720	HD domain-containing protein C4G3.17	29.01	11.4335	-1.34328	-3.30208	5e-05	0.00031057
Zm00001d023933	10:29995807-29996959	DIBOA-glucoside dioxygenase BX6	21.5147	8.48324	-1.34264	-2.56934	5e-05	0.00031057
Zm00001d018616	7:1055085-1058478	DDRGK domain-containing protein 1	104.311	41.1355	-1.34243	-4.22897	5e-05	0.00031057
Zm00001d023343	10:3824748-3825745	Non-specific lipid-transfer protein	1146.58	452.247	-1.34216	-3.8295	5e-05	0.00031057
Zm00001d009117	8:37517953-37519823	60S ribosomal protein L29-1	62.5396	24.6767	-1.34162	-2.84902	5e-05	0.00031057
Zm00001d028623	1:41163184-41168227	E3 ubiquitin-protein ligase SPL11	32.5254	12.8532	-1.33944	-4.26451	5e-05	0.00031057
Zm00001d045147	9:14236135-14273814	Probable pre-mRNA-splicing factor ATP-dependent RNA helicase DEAH4	12.9833	5.13676	-1.33772	-3.77407	5e-05	0.00031057
Zm00001d041880	3:142132875-142197276	Beta-galactosidase 15	41.1926	16.3051	-1.33706	-3.33506	5e-05	0.00031057
Zm00001d034935	1:306090106-306106885	.	64.7212	25.6429	-1.33568	-3.78962	5e-05	0.00031057
Zm00001d002122	2:6150634-6155146	Binding partner of ACD11 1	286.133	113.44	-1.33475	-3.46466	5e-05	0.00031057
Zm00001d051627	4:165049565-165054444	Probable RNA-binding protein ARP1	48.8688	19.376	-1.33464	-3.92518	5e-05	0.00031057
Zm00001d012160	8:169176091-169181164	50S ribosomal protein L13	42.7331	16.9438	-1.3346	-3.37011	5e-05	0.00031057
Zm00001d012260	8:171319752-171321312	Zinc finger protein STOP1 homolog	16.3865	6.50004	-1.33399	-3.41503	5e-05	0.00031057
Zm00001d014792	5:63348325-63353481	Endoplasmin homolog	78.031	30.9923	-1.33214	-4.0489	5e-05	0.00031057
Zm00001d018199	5:216404524-216421412	Bromodomain-containing protein 1	41.2415	16.3852	-1.33171	-2.96877	5e-05	0.00031057
Zm00001d037674	6:133714245-133717685	Tryptophan aminotransferase-related protein 2	1069.03	425.437	-1.32929	-3.79283	5e-05	0.00031057
Zm00001d020658	7:126934454-126937181	#N/A	25.5269	10.1593	-1.32922	-2.33593	0.0001	0.00057936
Zm00001d034002	1:280778673-280779884	Late embryogenesis abundant protein D-34	28.8584	11.4877	-1.3289	-2.54467	0.0001	0.00057936
Zm00001d054106	4:246775382-246780965	Protein disulfide isomerase-like 1-4	72.8965	29.033	-1.32816	-2.19001	5e-05	0.00031057
Zm00001d017203	5:188721724-188731050	F-box/LRR-repeat protein 14	35.8335	14.2771	-1.32761	-4.12278	5e-05	0.00031057
Zm00001d040864	3:73203867-73290655	Piezo-type mechanosensitive ion channel homolog	13.7748	5.49084	-1.32694	-2.4741	0.0001	0.00057936
Zm00001d048531	9:157939096-157942646	DEAD-box ATP-dependent RNA helicase 50	36.5311	14.5894	-1.32421	-3.97525	5e-05	0.00031057
Zm00001d007530	2:234048647-234054830	Probable inactive protein kinase At3g63330	16.1417	6.45402	-1.32252	-2.60014	5e-05	0.00031057
Zm00001d012557	8:176581700-176584547	DNA-directed RNA polymerases II and IV subunit 5A	11.914	4.76429	-1.32233	-2.41428	0.0001	0.00057936
Zm00001d037576	6:130116711-130119868	Pyrophosphate-energized vacuolar membrane proton pump	724.079	289.656	-1.32181	-3.83835	5e-05	0.00031057
Zm00001d042264	3:158018620-158023262	Aspartokinase 2, chloroplastic	6.18696	2.47863	-1.31969	-2.49881	0.0002	0.00106912
Zm00001d032961	1:244858794-244867417	Ent-copalyl diphosphate synthase 1, chloroplastic	8.95476	3.58772	-1.31959	-2.8888	5e-05	0.00031057
Zm00001d021682	7:159932804-159938980	Cysteine-rich receptor-like protein kinase 25	4.18988	1.67925	-1.3191	-2.08939	0.00105	0.00442562
Zm00001d038644	6:161622742-161636125	Protein RNA-directed DNA methylation 3	26.9011	10.7921	-1.3177	-1.52592	0.00115	0.004782
Zm00001d051419	4:157822996-157827073	GDSL esterase/lipase At4g16230	67.6799	27.1516	-1.31769	-2.24556	5e-05	0.00031057
Zm00001d016505	5:165226703-165228471	F-box protein At1g67340	496.119	199.254	-1.31608	-4.04156	5e-05	0.00031057
Zm00001d040028	3:23433455-23434226	#N/A	806.709	324.134	-1.31546	-3.98917	5e-05	0.00031057
Zm00001d004363	2:106492267-106494016	3-hydroxyindolin-2-one monooxygenase	17.7335	7.13152	-1.3142	-2.76691	5e-05	0.00031057
Zm00001d050884	4:128320233-128324274	Probable E3 ubiquitin ligase SUD1	15.6949	6.32016	-1.31226	-2.93716	5e-05	0.00031057
Zm00001d053785	4:241014850-241015599	.	66.9833	26.9796	-1.31193	-2.84596	5e-05	0.00031057
Zm00001d046246	9:76267441-76272887	NAC domain-containing protein 73	14.6489	5.90228	-1.31145	-2.93133	5e-05	0.00031057
Zm00001d032057	1:211041985-211046442	#N/A	91.6495	36.9316	-1.31127	-4.00895	5e-05	0.00031057
Zm00001d003176	2:34606364-34611108	Protein NLP2	7.73205	3.11633	-1.311	-3.45695	5e-05	0.00031057
Zm00001d013193	5:6175372-6176670	CCG-binding protein 1	328.332	132.332	-1.31099	-3.68798	5e-05	0.00031057
Zm00001d032283	1:220368810-220372532	#N/A	54.5097	22.0423	-1.30624	-4.05562	5e-05	0.00031057
Zm00001d023588	10:10863110-10865708	Proline-rich receptor-like protein kinase PERK10	6.63885	2.6886	-1.30408	-2.16427	0.00045	0.00217427
Zm00001d043813	3:210926553-210936267	IST1-like protein	4.318	1.75312	-1.30044	-2.23802	0.0008	0.00353513
Zm00001d040029	3:23586530-23587232	.	190.957	77.5296	-1.30043	-3.48022	5e-05	0.00031057
Zm00001d011386	8:149257113-149261860	Uroporphyrinogen decarboxylase 1, chloroplastic	20.3474	8.26207	-1.30027	-2.90542	5e-05	0.00031057
Zm00001d003945	2:71037397-71040700	Heavy metal-associated isoprenylated plant protein 7	528.533	214.837	-1.29875	-3.38234	5e-05	0.00031057
Zm00001d031531	1:192992192-192996753	#N/A	41.8626	17.067	-1.29445	-3.86959	5e-05	0.00031057
Zm00001d025988	10:135344275-135347905	GATA transcription factor 26	3.9683	1.61935	-1.2931	-2.60678	0.0001	0.00057936
Zm00001d032213	1:217293259-217296215	Transcription factor bHLH30	13.2793	5.42443	-1.29163	-2.35308	0.00065	0.00296301
Zm00001d053761	4:240633405-240644815	Protein STRUBBELIG-RECEPTOR FAMILY 3	44.9301	18.359	-1.2912	-4.13916	5e-05	0.00031057
Zm00001d052675	4:196963479-196969861	Protein DA1-related 2	14.8206	6.05594	-1.29118	-2.02255	0.0004	0.00196604
Zm00001d017537	5:198956549-198960993	#N/A	47.4622	19.3956	-1.29105	-3.07169	5e-05	0.00031057
Zm00001d019577	7:44053568-44054909	.	12.8929	5.27291	-1.2899	-2.39444	0.0001	0.00057936
Zm00001d018792	7:5330583-5347005	WPP domain-associated protein	27.718	11.3372	-1.28976	-4.28035	5e-05	0.00031057
Zm00001d039267	3:838391-842742	Auxin response factor 1	23.9135	9.78412	-1.28931	-3.83919	5e-05	0.00031057
Zm00001d031539	1:193693868-193697232	Methyltransferase-like protein 13	86.8787	35.5692	-1.28837	-3.97883	5e-05	0.00031057
Zm00001d026113	10:138719538-138725394	Protein indeterminate-domain 12	76.6589	31.3992	-1.28773	-3.45941	5e-05	0.00031057
Zm00001d025624	10:124380366-124383628	#N/A	10.4502	4.28212	-1.28713	-2.81653	5e-05	0.00031057
Zm00001d028240	1:27695824-27697683	50S ribosomal protein L15, chloroplastic (Fragment)	32.6808	13.3975	-1.28648	-2.9217	5e-05	0.00031057
Zm00001d009717	8:77524891-77526895	Probable polygalacturonase	5.24935	2.15243	-1.28617	-1.83725	0.00255	0.00933354
Zm00001d048925	4:8119413-8120922	Hydroquinone glucosyltransferase	11.4888	4.71662	-1.2844	-2.06177	0.0015	0.00597343
Zm00001d045391	9:20447063-20448408	Early nodulin-93	593.075	243.934	-1.28173	-3.58226	5e-05	0.00031057
Zm00001d019446	7:34277109-34278975	Heavy metal-associated isoprenylated plant protein 7	73.6179	30.2827	-1.28156	-3.67306	5e-05	0.00031057
Zm00001d025300	10:113290808-113298776	Sucrose nonfermenting 4-like protein	61.3535	25.2601	-1.28029	-3.92445	5e-05	0.00031057
Zm00001d013705	5:18158100-18163389	VAN3-binding protein	23.8985	9.85074	-1.27861	-2.91356	5e-05	0.00031057
Zm00001d017730	5:205467076-205473131	Protein Brevis radix-like 2	116.65	48.1282	-1.27724	-3.94371	5e-05	0.00031057
Zm00001d013712	5:18266522-18272776	Flowering locus K homology domain	32.7633	13.5269	-1.27625	-2.79466	5e-05	0.00031057
Zm00001d003911	2:66815687-66823285	Transport inhibitor response 1-like protein Os04g0395600	105.083	43.3873	-1.27619	-4.09619	5e-05	0.00031057
Zm00001d015279	5:82559259-82562792	Probable protein phosphatase 2C 10	161.658	66.7962	-1.2751	-3.93499	5e-05	0.00031057
Zm00001d047955	9:146097905-146100939	.	95.4431	39.4655	-1.27405	-3.78918	5e-05	0.00031057
Zm00001d021537	7:155328672-155330345	Transcription factor MYB26	82.9166	34.3023	-1.27336	-3.63218	5e-05	0.00031057
Zm00001d035047	6:3079205-3085065	.	46.3119	19.1684	-1.27266	-3.9387	5e-05	0.00031057
Zm00001d015125	5:76538415-76544145	PRA1 family protein H	7.98428	3.30542	-1.27233	-2.04358	0.001	0.00424841
Zm00001d011646	8:157426994-157432723	#N/A	51.9241	21.5086	-1.27149	-2.56493	5e-05	0.00031057
Zm00001d046145	9:66927903-66928554	RING-H2 finger protein ATL70	25.7383	10.678	-1.26927	-2.01174	0.00185	0.00713834
Zm00001d025098	10:103768671-103787574	Probable protein S-acyltransferase 14	31.2937	12.9856	-1.26896	-2.19095	0.0003	0.0015276
Zm00001d048424	9:155994046-155999070	YTH domain-containing family protein 2	716.582	297.413	-1.26867	-2.09894	0.00085	0.00371002
Zm00001d018807	7:5750533-5754873	Leucine-rich repeat receptor-like serine/threonine-protein kinase At1g17230	11.8069	4.90065	-1.26858	-3.31539	5e-05	0.00031057
Zm00001d014797	5:63622982-63627640	Probable protein phosphatase 2C 60	18.7605	7.79396	-1.26727	-3.34364	5e-05	0.00031057
Zm00001d007633	2:236564996-236567074	Stress-associated endoplasmic reticulum protein 2	51.3402	21.3494	-1.26589	-2.86531	5e-05	0.00031057
Zm00001d021666	7:159493892-159495965	Isocitrate lyase	146.269	60.8335	-1.26569	-3.57357	5e-05	0.00031057
Zm00001d031163	1:180291501-180295682	Haloacid dehalogenase-like hydrolase domain-containing protein At3g48420	17.0587	7.09533	-1.26557	-3.00994	5e-05	0.00031057
Zm00001d051964	4:175484594-175495683	Lysine-specific demethylase JMJ703	5.99444	2.4935	-1.26545	-3.46182	5e-05	0.00031057
Zm00001d027302	1:2284851-2289401	SKP1-like protein 20	37.2653	15.5048	-1.26511	-3.95512	5e-05	0.00031057
Zm00001d025241	10:110753798-110756285	Heavy metal-associated isoprenylated plant protein 7	1911.45	795.422	-1.26487	-3.14197	5e-05	0.00031057
Zm00001d007892	2:241888029-241891891	2-oxoisovalerate dehydrogenase subunit beta 1, mitochondrial	54.0741	22.5104	-1.26435	-3.61878	5e-05	0.00031057
Zm00001d053775	4:240849636-240853547	Squamosa promoter-binding-like protein 11	15.0426	6.26892	-1.26276	-2.8616	5e-05	0.00031057
Zm00001d008726	8:17930693-17934133	.	22.776	9.50126	-1.26132	-2.84787	5e-05	0.00031057
Zm00001d037894	6:141324494-141325549	Dehydrin DHN1	45.146	18.8387	-1.2609	-2.98351	5e-05	0.00031057
Zm00001d008777	8:19654740-19663889	DExH-box ATP-dependent RNA helicase DExH10	48.1744	20.1066	-1.26059	-4.18302	5e-05	0.00031057
Zm00001d029087	1:57457545-57464810	Sucrose synthase 4	53.0528	22.1441	-1.26051	-2.79254	5e-05	0.00031057
Zm00001d027880	1:16436907-16447108	Increased DNA methylation 1	3.11546	1.30053	-1.26035	-2.11613	0.0006	0.00276399
Zm00001d051016	4:137043229-137046561	#N/A	21.364	8.93398	-1.25781	-3.25583	5e-05	0.00031057
Zm00001d052273	4:185525523-185529258	Rac-like GTP-binding protein 3	62.008	25.9384	-1.25737	-3.637	5e-05	0.00031057
Zm00001d005980	2:194587916-194591943	#N/A	2.88931	1.20982	-1.25594	-2.18703	0.00055	0.00257305
Zm00001d004837	2:142729513-142739676	Ribonuclease P protein subunit p25-like protein	418.049	175.13	-1.25524	-3.82649	5e-05	0.00031057
Zm00001d051214	4:148918693-148925044	Bifunctional nitrilase/nitrile hydratase NIT4	21.417	8.97379	-1.25497	-3.14767	5e-05	0.00031057
Zm00001d034607	1:297658230-297671159	U-box domain-containing protein 63	13.8064	5.78922	-1.25389	-2.84021	5e-05	0.00031057
Zm00001d000301	B73V4_ctg107:28849-31668	0	18.5773	7.80045	-1.25191	-3.12582	5e-05	0.00031057
Zm00001d047272	9:124971830-124979656	.	290.223	121.886	-1.25162	-3.65011	5e-05	0.00031057
Zm00001d039918	3:19350842-19355642	L-Ala-D/L-amino acid epimerase	6.35844	2.67264	-1.25041	-2.40385	5e-05	0.00031057
Zm00001d038587	6:160544942-160563220	Transposon TX1 uncharacterized 149 kDa protein	13.997	5.88354	-1.25036	-2.11185	5e-05	0.00031057
Zm00001d036655	6:96564581-96572729	#N/A	2.85876	1.20572	-1.24549	-2.06521	0.0003	0.0015276
Zm00001d052110	4:179900071-179926942	Protein OPAQUE1	101.543	42.8512	-1.24469	-1.83724	0.0014	0.00563084
Zm00001d049232	4:21985959-21989985	UV-B-induced protein At3g17800, chloroplastic	7.76335	3.2765	-1.24452	-2.67421	5e-05	0.00031057
Zm00001d002028	2:4663112-4666196	Protein FATTY ACID EXPORT 2, chloroplastic	122.145	51.6214	-1.24255	-3.11696	5e-05	0.00031057
Zm00001d038529	6:159350687-159355063	NADH--cytochrome b5 reductase 1	7.34464	3.10797	-1.24072	-2.41214	0.00025	0.00130155
Zm00001d046934	9:111766178-111777865	#N/A	80.9884	34.3222	-1.23857	-3.38714	5e-05	0.00031057
Zm00001d000316	B73V4_ctg89:18902-24123	0	7.10193	3.00981	-1.23854	-2.71555	5e-05	0.00031057
Zm00001d036642	6:95986849-95990149	14 kDa zinc-binding protein	50.0309	21.2077	-1.23823	-3.16191	5e-05	0.00031057
Zm00001d037035	6:109824432-109840047	Cyclic nucleotide-gated ion channel 1	6.89223	2.92199	-1.23802	-3.16264	5e-05	0.00031057
Zm00001d044278	3:223869823-223874157	DNA repair protein RAD51 homolog 3	26.2153	11.1147	-1.23794	-3.37443	5e-05	0.00031057
Zm00001d011596	8:155437079-155438816	30S ribosomal protein S20, chloroplastic	7.13453	3.02501	-1.23788	-2.78763	5e-05	0.00031057
Zm00001d001798	2:1081626-1084219	Acyl-CoA-binding domain-containing protein 1	66.0231	27.9993	-1.23758	-3.5656	5e-05	0.00031057
Zm00001d009552	8:70006055-70009786	Ubiquitin-conjugating enzyme E2 36	45.3949	19.2785	-1.23554	-2.92599	5e-05	0.00031057
Zm00001d048391	9:155410693-155411701	GATA transcription factor 10	10.2889	4.36985	-1.23543	-1.85645	0.00245	0.00903408
Zm00001d035288	6:19435949-19439086	Stress-associated endoplasmic reticulum protein 2	720.755	306.121	-1.23541	-3.76338	5e-05	0.00031057
Zm00001d020170	7:97038325-97042873	.	108.249	45.9917	-1.23491	-3.83726	5e-05	0.00031057
Zm00001d051773	4:169202306-169204728	.	9.91388	4.21849	-1.23272	-2.47544	0.0001	0.00057936
Zm00001d008624	8:15102372-15104001	.	101.173	43.0556	-1.23256	-3.78854	5e-05	0.00031057
Zm00001d053223	4:220786139-220792268	Probable L-ascorbate peroxidase 4	101.673	43.2686	-1.23254	-3.89458	5e-05	0.00031057
Zm00001d040763	3:64298060-64299284	#N/A	21.9145	9.33062	-1.23184	-2.50827	0.0001	0.00057936
Zm00001d045321	9:18926277-18927731	.	45.233	19.2624	-1.23159	-3.16706	5e-05	0.00031057
Zm00001d017560	5:199613953-199621606	Protein indeterminate-domain 12	145.221	61.8527	-1.23134	-3.38475	5e-05	0.00031057
Zm00001d017777	5:206411177-206416485	.	13.2272	5.64843	-1.22758	-2.09203	0.00105	0.00442562
Zm00001d047293	9:125767226-125769173	PLASMODESMATA CALLOSE-BINDING PROTEIN 3	16.6182	7.09698	-1.22749	-2.21025	0.0006	0.00276399
Zm00001d033906	1:278181340-278185821	Endoplasmic reticulum oxidoreductin-1	105.009	44.8487	-1.22737	-3.9207	5e-05	0.00031057
Zm00001d038202	6:151448101-151448572	#N/A	113.882	48.6443	-1.22719	-2.58198	5e-05	0.00031057
Zm00001d013594	5:15048809-15050811	mRNA cap guanine-N7 methyltransferase 2	9.85031	4.20988	-1.22639	-2.01017	0.0009	0.00389168
Zm00001d039013	6:168706047-168709435	.	12.1035	5.17586	-1.22555	-2.81017	5e-05	0.00031057
Zm00001d044385	3:226574396-226576471	.	4.19573	1.79479	-1.2251	-1.90051	0.0026	0.00948567
Zm00001d010047	8:96814229-96821045	WPP domain-interacting tail-anchored protein 1	13.6452	5.841	-1.2241	-3.85691	5e-05	0.00031057
Zm00001d046616	9:98847756-98851557	E3 ubiquitin-protein ligase KEG	8.00602	3.432	-1.22203	-2.92865	5e-05	0.00031057
Zm00001d044243	3:222856355-222863087	piRNA biogenesis protein EXD1	58.928	25.2635	-1.2219	-3.87587	5e-05	0.00031057
Zm00001d000424	B73V4_ctg105:38569-40097	0	13.671	5.8636	-1.22126	-2.08252	0.00135	0.00545852
Zm00001d022586	7:180349407-180372483	Symplekin	33.813	14.5114	-1.22039	-3.70277	5e-05	0.00031057
Zm00001d002359	2:10788144-10793291	Probable potassium transporter 15	36.8246	15.8088	-1.21994	-3.93417	5e-05	0.00031057
Zm00001d008789	8:20247482-20265535	#N/A	15.9432	6.85226	-1.21829	-3.5767	5e-05	0.00031057
Zm00001d007094	2:222133463-222143376	Adenosine deaminase-like protein	12.5862	5.41332	-1.21726	-2.45182	0.00015	0.000830091
Zm00001d053189	4:218977060-218981425	Probable mediator of RNA polymerase II transcription subunit 26c	24.9385	10.7338	-1.21622	-3.01289	5e-05	0.00031057
Zm00001d022104	7:170386653-170389910	Pectinesterase QRT1	137.547	59.2036	-1.21617	-3.67463	5e-05	0.00031057
Zm00001d029841	1:89617720-89620070	0	5.41716	2.33191	-1.21602	-2.06006	0.0008	0.00353513
Zm00001d033892	1:277641446-277644180	.	31.3376	13.4901	-1.216	-3.11567	5e-05	0.00031057
Zm00001d020590	7:123883334-123888043	Alanine aminotransferase 2	2.43146	1.04669	-1.21599	-1.69325	0.0023	0.00857722
Zm00001d006243	2:202663870-202670238	Beta-galactosidase 12	18.8631	8.12529	-1.21507	-1.70494	0.00185	0.00713834
Zm00001d012684	8:178616998-178617343	#N/A	678.173	292.196	-1.21472	-2.97051	5e-05	0.00031057
Zm00001d047423	9:129607630-129609882	Pyrrolidone-carboxylate peptidase	42.6432	18.3783	-1.21431	-3.07199	5e-05	0.00031057
Zm00001d017502	5:197722482-197728745	Probable trehalose-phosphate phosphatase 1	35.4296	15.2699	-1.21427	-3.31239	5e-05	0.00031057
Zm00001d035013	6:1819414-1821213	indolin-2-one monooxygenase	9.19193	3.96179	-1.21422	-2.09105	0.0007	0.00315458
Zm00001d033654	1:269766089-269773110	Protein OPAQUE10	60.3722	26.0319	-1.2136	-2.97703	5e-05	0.00031057
Zm00001d047719	9:139925462-139928258	Serine/threonine-protein kinase STY46	3.98252	1.7183	-1.2127	-2.08614	0.00135	0.00545852
Zm00001d053697	4:239382346-239406395	Methyl-CpG-binding domain-containing protein 9	34.694	14.9804	-1.21161	-3.73324	5e-05	0.00031057
Zm00001d039685	3:11843727-11847491	Galactinol--sucrose galactosyltransferase	7.71992	3.33489	-1.21095	-2.05089	0.0006	0.00276399
Zm00001d032455	1:227281638-227288608	Electron transfer flavoprotein-ubiquinone oxidoreductase, mitochondrial	61.0749	26.3835	-1.21094	-3.87413	5e-05	0.00031057
Zm00001d042794	3:179902052-179907809	DNA excision repair protein ERCC-8	11.3748	4.918	-1.2097	-2.27745	0.00035	0.00174885
Zm00001d040920	3:79222600-79256661	tRNA (guanine(37)-N1)-methyltransferase 1	3.92131	1.69754	-1.20789	-2.40886	0.00015	0.000830091
Zm00001d009439	8:64588226-64593921	Phosphatidylinositol/phosphatidylcholine transfer protein SFH8	14.9168	6.45778	-1.20783	-3.59837	5e-05	0.00031057
Zm00001d039156	6:171181093-171184464	ELF3-like protein 2	35.8515	15.524	-1.20754	-3.70033	5e-05	0.00031057
Zm00001d048366	9:155189792-155191697	.	16.5827	7.18297	-1.20703	-2.37613	5e-05	0.00031057
Zm00001d027816	1:14361468-14365136	#N/A	24.2618	10.515	-1.20623	-2.37852	0.00025	0.00130155
Zm00001d036551	6:91831036-91834032	Transcription factor GAMYB	3.71224	1.61074	-1.20456	-2.34449	0.00025	0.00130155
Zm00001d038224	6:151975767-151979800	F-box protein SKP2A	143.995	62.5243	-1.20352	-3.50089	5e-05	0.00031057
Zm00001d012475	8:175178144-175184442	Abscisic acid receptor PYL6	144.179	62.6337	-1.20285	-3.45384	5e-05	0.00031057
Zm00001d018595	7:180279-183084	Sulfoquinovosyl transferase SQD2	10.547	4.58287	-1.20251	-2.68083	5e-05	0.00031057
Zm00001d018864	7:7675153-7687966	Histone deacetylase 15	12.9866	5.64662	-1.20156	-3.39726	5e-05	0.00031057
Zm00001d043974	3:215434495-215435257	.	53.0576	23.0796	-1.20094	-2.55979	5e-05	0.00031057
Zm00001d054079	4:245974144-245978028	Putative nitric oxide synthase	3.65038	1.5881	-1.20075	-2.15246	0.00065	0.00296301
Zm00001d038337	6:154805910-154809400	DAR GTPase 3, chloroplastic	13.2879	5.78391	-1.19999	-3.01548	5e-05	0.00031057
Zm00001d003198	2:35342452-35387667	eIF-2-alpha kinase GCN2	38.4467	16.7355	-1.19995	-3.34561	5e-05	0.00031057
Zm00001d035256	6:17759388-17765846	Protein SUPPRESSOR OF GENE SILENCING 3 homolog	60.4089	26.305	-1.19942	-4.03999	5e-05	0.00031057
Zm00001d016459	5:163059295-163070333	Serine carboxypeptidase 1	122.284	53.2641	-1.199	-3.85278	5e-05	0.00031057
Zm00001d004095	2:82544088-82547190	Transcription factor bHLH35	6.52813	2.84379	-1.19885	-1.77542	0.00245	0.00903408
Zm00001d011122	8:139568854-139571751	Transcription initiation factor TFIID subunit 14b	18.7612	8.18183	-1.19726	-2.8024	5e-05	0.00031057
Zm00001d020609	7:124932903-124937862	Respiratory burst oxidase homolog protein F	69.4188	30.2856	-1.19669	-3.5503	5e-05	0.00031057
Zm00001d022153	7:171356491-171370857	Glycerophosphodiester phosphodiesterase GDPDL4	3.86637	1.6873	-1.19626	-2.51729	5e-05	0.00031057
Zm00001d046047	9:58917267-58962605	WD repeat-containing protein 7	5.98404	2.61277	-1.19554	-3.16934	5e-05	0.00031057
Zm00001d039563	3:8042761-8065502	U3 small nucleolar RNA-associated protein 20	16.9743	7.4116	-1.19549	-3.81836	5e-05	0.00031057
Zm00001d002642	2:17897819-17900567	Dof zinc finger protein DOF4.6	20.1532	8.8062	-1.19442	-2.44507	5e-05	0.00031057
Zm00001d038282	6:153243816-153250372	Serine/threonine-protein kinase Nek4	5.20984	2.27703	-1.19409	-3.04867	5e-05	0.00031057
Zm00001d041214	3:105721653-105727958	Plasma membrane ATPase 2 (Fragment)	32.1836	14.0674	-1.19397	-3.75266	5e-05	0.00031057
Zm00001d020230	7:101295369-101299977	CRM-domain containing factor CFM3, chloroplastic/mitochondrial	4.22986	1.84921	-1.1937	-2.91936	5e-05	0.00031057
Zm00001d017812	5:207515529-207524652	Uncharacterized protein At1g26090, chloroplastic	6.86255	3.00073	-1.19343	-2.36661	0.00015	0.000830091
Zm00001d043031	3:187050347-187052568	Protein NUCLEAR FUSION DEFECTIVE 4	7.28038	3.18603	-1.19225	-1.93506	0.0014	0.00563084
Zm00001d005396	2:172253191-172255990	ORM1-like protein 3	109.123	47.7564	-1.19218	-3.43959	5e-05	0.00031057
Zm00001d012958	5:2364387-2370531	Protein kinase APK1B, chloroplastic	89.723	39.2816	-1.19163	-3.62873	5e-05	0.00031057
Zm00001d027763	1:13052385-13053952	.	19.2332	8.43029	-1.18995	-2.29537	0.0003	0.0015276
Zm00001d018363	5:219212151-219212466	Probable steroid-binding protein 3	579.638	254.31	-1.18856	-2.31189	0.0001	0.00057936
Zm00001d040147	3:29191549-29194489	#N/A	30.3408	13.3343	-1.18612	-3.09169	5e-05	0.00031057
Zm00001d049008	4:12383790-12387641	Probable apyrase 3	129.142	56.758	-1.18606	-3.75253	5e-05	0.00031057
Zm00001d046397	9:87184188-87186144	#N/A	17.9099	7.87521	-1.18536	-2.88156	5e-05	0.00031057
Zm00001d040644	3:55831478-55833662	RING finger protein 5	12.0821	5.31843	-1.1838	-2.63318	5e-05	0.00031057
Zm00001d045144	9:14222618-14223173	Preprotein translocase subunit SECE1	31.9871	14.0811	-1.18373	-1.92457	0.00155	0.00614505
Zm00001d020609	7:124925903-124930053	Respiratory burst oxidase homolog protein F	126.176	55.5449	-1.18371	-3.65364	5e-05	0.00031057
Zm00001d041883	3:142276944-142278755	GATA transcription factor 14	45.0157	19.8187	-1.18356	-3.07591	5e-05	0.00031057
Zm00001d046016	9:55158777-55161731	Phosphatidylinositol 4-kinase gamma 4	73.5647	32.4098	-1.18258	-3.8328	5e-05	0.00031057
Zm00001d028560	1:39154935-39163793	LRR receptor-like serine/threonine-protein kinase FEI 1	82.9514	36.559	-1.18204	-3.2859	5e-05	0.00031057
Zm00001d029595	1:78348952-78351415	Uncharacterized protein At2g23090	417.95	184.223	-1.18188	-3.60068	5e-05	0.00031057
Zm00001d029419	1:69743528-69747782	Probable protein phosphatase 2C 12	15.0737	6.64519	-1.18165	-3.37151	5e-05	0.00031057
Zm00001d013005	5:2997318-3000825	E3 ubiquitin-protein ligase RING1	168.292	74.2047	-1.18138	-3.77682	5e-05	0.00031057
Zm00001d051976	4:175714875-175730530	Probable starch synthase 4, chloroplastic/amyloplastic	24.2546	10.6951	-1.1813	-3.35338	5e-05	0.00031057
Zm00001d001984	2:3952211-3954752	Probable amino acid permease 7	25.8946	11.4277	-1.18012	-2.6688	5e-05	0.00031057
Zm00001d050430	4:87428110-87436083	Stromal cell-derived factor 2-like protein	213.334	94.2232	-1.17896	-3.68571	5e-05	0.00031057
Zm00001d048195	9:152187405-152188725	.	15.4672	6.83352	-1.17851	-2.76266	5e-05	0.00031057
Zm00001d015705	5:109791491-109802417	#N/A	48.792	21.5759	-1.17722	-2.97356	5e-05	0.00031057
Zm00001d009661	8:74956155-74962734	#N/A	6.56002	2.90137	-1.17697	-2.44561	0.0002	0.00106912
Zm00001d028397	1:33440964-33448136	Acyl-CoA-binding domain-containing protein 3	32.2894	14.2827	-1.1768	-3.3474	5e-05	0.00031057
Zm00001d023423	10:5173803-5179273	ACT domain-containing protein ACR12	51.1947	22.6497	-1.1765	-3.48516	5e-05	0.00031057
Zm00001d042367	3:163389336-163392614	Selenium-binding protein 1	227.064	100.598	-1.17449	-3.60152	5e-05	0.00031057
Zm00001d008858	8:22865172-22869630	.	39.5523	17.5296	-1.17397	-2.57408	0.00015	0.000830091
Zm00001d046827	9:107405326-107408013	#N/A	4.46877	1.9812	-1.1735	-2.32029	0.00085	0.00371002
Zm00001d008042	8:67649932-67652077	#N/A	2.51556	1.11546	-1.17324	-2.31814	0.00025	0.00130155
Zm00001d031725	1:199651975-199653028	Transcription factor PCF2	16.1501	7.18443	-1.1686	-1.85228	0.0025	0.00918832
Zm00001d016695	5:172823150-172832241	Probable sodium/metabolite cotransporter BASS4, chloroplastic	4.94448	2.19975	-1.16848	-2.02752	0.001	0.00424841
Zm00001d038327	6:154610723-154620497	Subtilisin-like protease SBT3.17	749.495	333.56	-1.16797	-3.43344	5e-05	0.00031057
Zm00001d024298	10:62684242-62685430	Histone-lysine N-methyltransferase ASHR2	24.5208	10.9144	-1.16777	-2.38869	5e-05	0.00031057
Zm00001d022160	7:171442294-171444896	Probable calcium-binding protein CML13	116.048	51.6888	-1.16679	-3.46125	5e-05	0.00031057
Zm00001d025763	10:128651684-128657893	.	107.481	47.875	-1.16674	-2.3895	0.0001	0.00057936
Zm00001d053861	4:242512381-242523643	Translation factor GUF1 homolog, chloroplastic	6.31027	2.81128	-1.16648	-2.8052	5e-05	0.00031057
Zm00001d049333	4:26910738-26922418	Ribonuclease P protein subunit p25-like protein	22.7282	10.1297	-1.16589	-3.02899	5e-05	0.00031057
Zm00001d044464	3:228879985-228881480	#N/A	53.6258	23.9064	-1.16553	-2.19099	0.00015	0.000830091
Zm00001d031587	1:195526968-195533151	Ubiquitin carboxyl-terminal hydrolase 2	14.0218	6.25152	-1.16539	-3.68023	5e-05	0.00031057
Zm00001d020396	7:111240633-111244556	Alpha,alpha-trehalose-phosphate synthase [UDP-forming] 6	56.1049	25.0151	-1.16533	-3.5864	5e-05	0.00031057
Zm00001d023431	10:5419970-5427473	Signal recognition particle 54 kDa protein, chloroplastic	3.28788	1.46599	-1.16528	-2.26874	0.00135	0.00545852
Zm00001d016460	5:163090195-163091701	Serine carboxypeptidase 1	63.0134	28.1041	-1.16488	-3.20879	5e-05	0.00031057
Zm00001d021954	7:167040478-167048024	Putative MO25-like protein At5g47540	58.702	26.1847	-1.16469	-3.53304	5e-05	0.00031057
Zm00001d035975	6:63921811-63926812	Chaperone protein dnaJ GFA2, mitochondrial	51.5375	22.9888	-1.16469	-3.54353	5e-05	0.00031057
Zm00001d037536	6:128541534-128605590	E3 ubiquitin-protein ligase MBR2	95.139	42.4524	-1.16419	-2.62668	5e-05	0.00031057
Zm00001d048176	9:151547407-151550218	Vicilin-like seed storage protein At2g18540	525.401	234.472	-1.164	-2.57697	5e-05	0.00031057
Zm00001d040238	3:33378957-33383589	Probable uridine nucleosidase 2	6.13236	2.7372	-1.16374	-1.83717	0.00145	0.00579593
Zm00001d037150	6:113956789-113961796	Probable tyrosine-protein phosphatase At1g05000	21.1984	9.46258	-1.16365	-3.1117	5e-05	0.00031057
Zm00001d008396	8:7204887-7207905	#N/A	220.427	98.4094	-1.16343	-3.61644	5e-05	0.00031057
Zm00001d003398	2:43019870-43020779	Protein FLOURY 1	163.35	72.9288	-1.16341	-3.41778	5e-05	0.00031057
Zm00001d010026	8:95731143-95746178	Lysophospholipid acyltransferase LPEAT1	31.1216	13.8992	-1.16291	-3.14613	5e-05	0.00031057
Zm00001d015527	5:96005408-96009168	Probable receptor-like protein kinase At1g80640	9.07555	4.05523	-1.1622	-2.54596	0.0001	0.00057936
Zm00001d002836	2:24258447-24264660	O-glucosyltransferase rumi homolog	6.43973	2.87845	-1.16171	-1.93515	0.00115	0.004782
Zm00001d049676	4:39724694-39729894	Polyadenylate-binding protein-interacting protein 11	50.7218	22.682	-1.16106	-3.12587	5e-05	0.00031057
Zm00001d034112	1:284242027-284244325	Subtilisin-like protease SBT1.7	187.756	83.972	-1.16088	-3.42833	5e-05	0.00031057
Zm00001d038104	6:148044309-148054129	Mannosylglycoprotein endo-beta-mannosidase	4.5991	2.05696	-1.16083	-2.56601	5e-05	0.00031057
Zm00001d035321	6:21256644-21260184	Upstream activation factor subunit UAF30	96.5376	43.1842	-1.16059	-3.09512	5e-05	0.00031057
Zm00001d029091	1:57485975-57493258	Sucrose synthase 4	37.5351	16.795	-1.1602	-2.86478	5e-05	0.00031057
Zm00001d021709	7:160908388-160912025	Isopentenyl-diphosphate Delta-isomerase I	785.288	351.433	-1.15997	-3.25898	5e-05	0.00031057
Zm00001d009750	8:79623874-79651205	Chromatin modification-related protein EAF1 B	12.3007	5.50633	-1.15958	-3.45797	5e-05	0.00031057
Zm00001d038304	6:154053715-154056057	Cyclomaltodextrin glucanotransferase	81.2767	36.3913	-1.15925	-3.66644	5e-05	0.00031057
Zm00001d007213	2:224810258-224820340	D-alanine--D-alanine ligase	9.47851	4.24426	-1.15915	-3.11644	5e-05	0.00031057
Zm00001d007318	2:228269950-228282379	Bifunctional dihydrofolate reductase-thymidylate synthase	27.0896	12.1316	-1.15897	-3.66973	5e-05	0.00031057
Zm00001d012206	8:170076974-170078757	#N/A	73.0016	32.7105	-1.15817	-3.07472	5e-05	0.00031057
Zm00001d038999	6:168511299-168514580	Protein DEHYDRATION-INDUCED 19	143.1	64.1326	-1.1579	-3.55833	5e-05	0.00031057
Zm00001d012224	8:170419465-170424898	Putative UDP-glucuronate:xylan alpha-glucuronosyltransferase 3	51.3555	23.0186	-1.15772	-3.63178	5e-05	0.00031057
Zm00001d034760	1:301511659-301512118	Ferredoxin-3, chloroplastic	3447.34	1545.36	-1.15754	-3.41042	5e-05	0.00031057
Zm00001d002185	2:7537953-7550392	Histone-lysine N-methyltransferase ATXR2	11.4908	5.15181	-1.15732	-2.25095	0.0009	0.00389168
Zm00001d018318	5:218380631-218387455	Serine/threonine-protein kinase STY8	19.5061	8.74678	-1.1571	-3.74387	5e-05	0.00031057
Zm00001d012273	8:171684369-171696504	G-box-binding factor 4	9.75138	4.37317	-1.15693	-2.04498	0.0011	0.00460096
Zm00001d010727	8:126049913-126051817	.	51.3515	23.0367	-1.15647	-3.20229	5e-05	0.00031057
Zm00001d037209	6:115848017-115852402	Probable RNA-binding protein ARP1	278.316	124.857	-1.15645	-3.60577	5e-05	0.00031057
Zm00001d012068	8:167588204-167588672	Cysteine proteinase inhibitor 4	106.697	47.9168	-1.15492	-2.2602	0.0002	0.00106912
Zm00001d019181	7:20575191-20579125	.	38.2694	17.1886	-1.15474	-3.34091	5e-05	0.00031057
Zm00001d051415	4:157604147-157608446	Mechanosensitive ion channel protein 8	16.5413	7.43254	-1.15414	-3.17351	5e-05	0.00031057
Zm00001d038850	6:165838013-165840784	Probable ADP,ATP carrier protein At5g56450	11.0898	4.9849	-1.15359	-2.13652	0.0005	0.00237556
Zm00001d034358	1:290659742-290663205	Peroxisomal membrane protein 13	73.0559	32.8427	-1.15343	-3.51587	5e-05	0.00031057
Zm00001d020343	7:107890190-107895098	Probable acyl-activating enzyme 17, peroxisomal	9.74546	4.38172	-1.15323	-2.56548	0.0001	0.00057936
Zm00001d052796	4:201214848-201216177	14-3-3-like protein GF14-A	94.8383	42.6487	-1.15297	-3.05525	5e-05	0.00031057
Zm00001d005658	2:182513910-182516018	Probable trehalose-phosphate phosphatase 7	25.8415	11.6318	-1.15162	-2.50206	0.0001	0.00057936
Zm00001d025362	10:115708852-115710913	HVA22-like protein j	14.94	6.72742	-1.15106	-1.94082	0.00135	0.00545852
Zm00001d050815	4:124389945-124391067	F-box/kelch-repeat protein At2g44130	66.0425	29.7612	-1.14996	-2.913	5e-05	0.00031057
Zm00001d026084	10:138077229-138079896	.	17.7005	7.97678	-1.14992	-2.3986	0.0003	0.0015276
Zm00001d026425	10:145556563-145561470	Binding partner of ACD11 1	15.869	7.15187	-1.14981	-2.52363	5e-05	0.00031057
Zm00001d005579	2:179323020-179329228	Lipid phosphate phosphatase 2	32.3165	14.5667	-1.1496	-2.95623	5e-05	0.00031057
Zm00001d013278	5:7694322-7714914	Increased DNA methylation 1	9.36493	4.22177	-1.14942	-2.25218	0.00025	0.00130155
Zm00001d044940	9:7823934-7834292	bZIP transcription factor TRAB1	235.29	106.126	-1.14866	-3.3866	5e-05	0.00031057
Zm00001d014013	5:28634909-28639671	Auxin response factor 22	19.168	8.64617	-1.14857	-3.02859	5e-05	0.00031057
Zm00001d042142	3:153382172-153383674	Probable inactive purple acid phosphatase 16	24.8132	11.193	-1.14852	-2.47612	5e-05	0.00031057
Zm00001d007121	2:222781920-222806658	Retrovirus-related Pol polyprotein from transposon TNT 1-94	5.69827	2.57336	-1.14687	-3.33748	5e-05	0.00031057
Zm00001d053799	4:241325592-241338982	.	3.70032	1.67502	-1.14347	-2.04911	0.00135	0.00545852
Zm00001d045390	9:20402632-20404124	Early nodulin-93	809.083	366.583	-1.14215	-2.8652	5e-05	0.00031057
Zm00001d036454	6:89082528-89089703	Putative pentatricopeptide repeat-containing protein At1g77010, mitochondrial	54.3409	24.6237	-1.14199	-3.4799	5e-05	0.00031057
Zm00001d014716	5:60301619-60307045	.	12.4835	5.65746	-1.1418	-2.85498	5e-05	0.00031057
Zm00001d006699	2:214602480-214605127	.	188.035	85.231	-1.14155	-3.35547	5e-05	0.00031057
Zm00001d048194	9:152171883-152176225	N-acetyltransferase 9-like protein	16.0732	7.28598	-1.14146	-2.45962	0.00015	0.000830091
Zm00001d019306	7:26934722-26940001	IAA-amino acid hydrolase ILR1-like 9	205.72	93.3416	-1.14009	-3.33684	5e-05	0.00031057
Zm00001d008548	8:12671726-12672398	Bowman-Birk type wound-induced proteinase inhibitor WIP1	72.9559	33.1699	-1.13715	-2.44748	5e-05	0.00031057
Zm00001d044422	3:227572094-227574742	#N/A	32.4324	14.7805	-1.13374	-2.73322	5e-05	0.00031057
Zm00001d009753	8:79788465-79795801	ATP-dependent zinc metalloprotease FTSH 5, mitochondrial	22.539	10.2739	-1.13344	-3.3799	5e-05	0.00031057
Zm00001d015423	5:89382777-89386161	NudC domain-containing protein 2	24.1694	11.0178	-1.13335	-2.36027	0.0001	0.00057936
Zm00001d036698	6:98069168-98071529	Pentatricopeptide repeat-containing protein At2g18940, chloroplastic	5.21024	2.37746	-1.13193	-1.98952	0.0014	0.00563084
Zm00001d037000	6:108693908-108695080	.	115.176	52.5837	-1.13116	-2.8007	5e-05	0.00031057
Zm00001d053350	4:227153209-227164438	Protein CONTINUOUS VASCULAR RING 1	63.4907	29.0185	-1.12957	-3.16301	5e-05	0.00031057
Zm00001d028218	1:26887362-26899704	Probable methionine--tRNA ligase	57.4391	26.2561	-1.12938	-3.79257	5e-05	0.00031057
Zm00001d027936	1:17962827-17975699	Phytoene dehydrogenase, chloroplastic/chromoplastic	72.5394	33.1781	-1.12853	-2.83226	5e-05	0.00031057
Zm00001d009193	8:42033252-42035233	GATA transcription factor 23	57.9362	26.501	-1.12842	-2.90401	5e-05	0.00031057
Zm00001d024239	10:59002719-59005171	Autophagy-related protein 8C	86.1138	39.3898	-1.12842	-2.85982	5e-05	0.00031057
Zm00001d006342	2:205070818-205080041	Mitochondrial amidoxime reducing component 2	104.859	47.965	-1.1284	-3.4699	5e-05	0.00031057
Zm00001d042350	3:162539735-162542986	.	39.8888	18.2609	-1.12723	-2.76022	5e-05	0.00031057
Zm00001d026277	10:142707253-142721455	Oxygen-dependent coproporphyrinogen-III oxidase, chloroplastic	9.6728	4.43316	-1.1256	-2.28662	0.00015	0.000830091
Zm00001d034523	1:295617954-295620748	Protochlorophyllide-dependent translocon component 52, chloroplastic	18.9547	8.69898	-1.12364	-2.64536	5e-05	0.00031057
Zm00001d016873	5:178968179-178971530	Transcription factor bHLH82	53.2545	24.4409	-1.1236	-3.11747	5e-05	0.00031057
Zm00001d042944	3:184663168-184665149	Caffeoylshikimate esterase	99.1175	45.4921	-1.12352	-3.23374	5e-05	0.00031057
Zm00001d020549	7:121994153-122009096	5'-nucleotidase domain-containing protein DDB_G0275467	5.353	2.45704	-1.12343	-2.37537	0.00045	0.00217427
Zm00001d032671	1:233744076-233747008	.	62.3396	28.6326	-1.12249	-2.69096	5e-05	0.00031057
Zm00001d030385	1:127955211-127967875	Maspardin	24.3121	11.1702	-1.12202	-2.81854	5e-05	0.00031057
Zm00001d008422	8:8312883-8317910	Protein EXECUTER 2, chloroplastic	87.7926	40.3492	-1.12156	-3.63719	5e-05	0.00031057
Zm00001d013247	5:7088990-7093966	#N/A	4.82459	2.21761	-1.1214	-2.84868	5e-05	0.00031057
Zm00001d033228	1:255219555-255227771	Ornithine aminotransferase, mitochondrial	163.51	75.1825	-1.12091	-3.42106	5e-05	0.00031057
Zm00001d034005	1:280996413-281000773	YTH domain-containing family protein 1	69.6994	32.0571	-1.1205	-3.57865	5e-05	0.00031057
Zm00001d002429	2:12492415-12496032	Growth-regulating factor 3	67.9752	31.2883	-1.11939	-2.41493	0.0001	0.00057936
Zm00001d020463	7:116451758-116465310	Sugar transport protein 7	27.3763	12.6022	-1.11925	-2.66482	5e-05	0.00031057
Zm00001d033641	1:269355258-269358365	#N/A	41.0934	18.9435	-1.11721	-3.0047	5e-05	0.00031057
Zm00001d026030	10:136396306-136404366	Cyclin-T1-3	12.6597	5.83606	-1.11718	-2.74885	5e-05	0.00031057
Zm00001d038995	6:168419977-168423074	Ubiquitin-conjugating enzyme E2 36	155.95	71.8957	-1.1171	-2.9617	5e-05	0.00031057
Zm00001d015367	5:86479070-86481259	Ribonuclease H2 subunit C	15.187	7.00267	-1.11686	-2.05902	0.00085	0.00371002
Zm00001d033075	1:249662820-249664552	Transcription factor GAMYB	34.9542	16.1182	-1.11677	-2.73127	0.0001	0.00057936
Zm00001d022525	7:179337786-179341946	Cyclic dof factor 2	31.1056	14.3558	-1.11554	-3.11144	5e-05	0.00031057
Zm00001d013700	5:17882004-17883379	.	14.9291	6.89144	-1.11525	-2.00012	0.00105	0.00442562
Zm00001d017863	5:209096526-209100036	Protein-tyrosine-phosphatase IBR5	11.733	5.42163	-1.11378	-2.35354	0.00015	0.000830091
Zm00001d017204	5:188797630-188801896	Adenine phosphoribosyltransferase 2	133.215	61.5711	-1.11343	-3.18247	5e-05	0.00031057
Zm00001d002952	2:27986030-27988042	Probable aquaporin TIP3-2	26.0543	12.0467	-1.11288	-2.2259	0.0002	0.00106912
Zm00001d019125	7:18150926-18154824	.	8.336	3.85518	-1.11256	-2.25241	0.0002	0.00106912
Zm00001d012972	5:2582303-2584012	Chalcone--flavonone isomerase	34.2702	15.8514	-1.11234	-2.29663	0.00015	0.000830091
Zm00001d051636	4:165279656-165288465	Fatty acid desaturase DES2	62.0446	28.6985	-1.11233	-3.14678	5e-05	0.00031057
Zm00001d023272	10:1803505-1810618	Regulation of nuclear pre-mRNA domain-containing protein 1A	30.0044	13.8801	-1.11216	-2.50823	5e-05	0.00031057
Zm00001d034172	1:285664114-285665964	Protein FATTY ACID EXPORT 3, chloroplastic	44.5716	20.6237	-1.11182	-2.68625	5e-05	0.00031057
Zm00001d022065	7:169202865-169205554	Glycine-rich RNA-binding protein 3, mitochondrial	8.20378	3.79656	-1.1116	-2.22085	0.00035	0.00174885
Zm00001d026368	10:144424158-144426437	Thioredoxin-like protein CXXS1	134.506	62.2488	-1.11155	-3.25136	5e-05	0.00031057
Zm00001d017448	5:196097027-196100351	Vesicle-associated protein 2-1	11.3702	5.26215	-1.11154	-2.2218	0.00025	0.00130155
Zm00001d050781	4:122461154-122466889	Auxin response factor 7	47.6577	22.0953	-1.10897	-3.57335	5e-05	0.00031057
Zm00001d051790	4:169874738-169878071	APO protein 2, chloroplastic	10.3088	4.78383	-1.10764	-2.57349	0.0001	0.00057936
Zm00001d021417	7:151554715-151557062	#N/A	54.6853	25.3836	-1.10726	-2.76172	5e-05	0.00031057
Zm00001d028237	1:27571848-27577275	#N/A	7.53979	3.50072	-1.10687	-2.26763	0.00015	0.000830091
Zm00001d040901	3:77281571-77301205	.	23.5872	10.9524	-1.10676	-2.87575	5e-05	0.00031057
Zm00001d035285	6:19340068-19371142	Heat shock protein 90-6, mitochondrial	3.78734	1.75893	-1.10649	-2.55067	0.0002	0.00106912
Zm00001d053827	4:241938609-241946692	BEACH domain-containing protein B	14.721	6.84032	-1.10574	-3.62489	5e-05	0.00031057
Zm00001d000240	B73V4_ctg11:22239-26791	0	35.2771	16.4022	-1.10484	-3.00544	5e-05	0.00031057
Zm00001d018504	5:221977187-221990364	#N/A	23.9461	11.1348	-1.10471	-2.81502	5e-05	0.00031057
Zm00001d032337	1:223035488-223037623	Thioredoxin-like protein CITRX, chloroplastic	30.172	14.0317	-1.10452	-2.79311	5e-05	0.00031057
Zm00001d051103	4:142662757-142671086	Chloride channel protein CLC-f	9.36377	4.35944	-1.10295	-2.13463	0.00035	0.00174885
Zm00001d031860	1:204433976-204438771	7-hydroxymethyl chlorophyll a reductase, chloroplastic	4.78193	2.2267	-1.10268	-2.06743	0.00055	0.00257305
Zm00001d035770	6:46875090-46882203	Phosphatidylinositol/phosphatidylcholine transfer protein SFH6	120.153	55.9636	-1.10232	-2.89555	5e-05	0.00031057
Zm00001d018086	5:213976675-213977392	#N/A	24.1183	11.2359	-1.10202	-1.92291	0.00255	0.00933354
Zm00001d012286	8:171908318-171913492	Sorting nexin 1	19.842	9.2454	-1.10175	-3.04431	5e-05	0.00031057
Zm00001d006701	2:214683528-214685193	Chitin-inducible gibberellin-responsive protein 2	104.524	48.7284	-1.101	-3.37145	5e-05	0.00031057
Zm00001d033283	1:257400611-257406810	VAN3-binding protein	25.1352	11.7216	-1.10055	-2.70103	5e-05	0.00031057
Zm00001d011792	8:161705739-161709095	UDP-D-apiose/UDP-D-xylose synthase	85.5928	39.9359	-1.0998	-3.43462	5e-05	0.00031057
Zm00001d019866	7:71125637-71134674	Probable protein phosphatase 2C 48	32.7241	15.2885	-1.09791	-2.44757	0.0001	0.00057936
Zm00001d010646	8:122873950-122875909	Histone-lysine N-methyltransferase, H3 lysine-9 specific SUVH1	60.1623	28.1078	-1.09789	-3.0945	5e-05	0.00031057
Zm00001d030868	1:164196406-164205410	Putative nucleobase-ascorbate transporter 10	104.481	48.8447	-1.09697	-3.41377	5e-05	0.00031057
Zm00001d040850	3:71571868-71601459	Bifunctional 3-dehydroquinate dehydratase/shikimate dehydrogenase, chloroplastic	30.997	14.4974	-1.09634	-3.52506	5e-05	0.00031057
Zm00001d018883	7:8339736-8344221	Probable inactive leucine-rich repeat receptor-like protein kinase At3g03770	9.56334	4.47757	-1.0948	-2.37596	0.0001	0.00057936
Zm00001d000707	3:220216161-220218508	#N/A	2.9093	1.36282	-1.09407	-2.40159	0.0006	0.00276399
Zm00001d016193	5:149830370-149856132	Coatomer subunit beta'-1	4.46054	2.08972	-1.09391	-2.26828	0.00095	0.00406591
Zm00001d008954	8:26894966-26904334	.	9.1975	4.30953	-1.09371	-2.31747	0.00015	0.000830091
Zm00001d052662	4:196293688-196295872	.	32.5841	15.2678	-1.09368	-2.33049	0.00025	0.00130155
Zm00001d023583	10:10822455-10840261	Dynamin-like protein ARC5	15.687	7.35162	-1.09343	-3.18968	5e-05	0.00031057
Zm00001d023237	10:1096895-1100874	RNA-directed DNA methylation 4	6.41593	3.0085	-1.09261	-2.29663	0.0006	0.00276399
Zm00001d004896	2:147532849-147537808	mRNA-decapping enzyme-like protein	43.2004	20.2577	-1.09257	-3.12954	5e-05	0.00031057
Zm00001d011352	8:147819973-147824314	TPR repeat-containing thioredoxin TTL1	80.5463	37.7948	-1.09163	-3.47281	5e-05	0.00031057
Zm00001d011578	8:154851162-154856045	Tubby-like F-box protein 1	36.7737	17.258	-1.09141	-3.0572	5e-05	0.00031057
Zm00001d010235	8:105392132-105402990	Uncharacterized protein At5g08430	14.3392	6.734	-1.09043	-2.41835	0.00015	0.000830091
Zm00001d017958	5:210867624-210871221	Glutamine synthetase root isozyme 3	50.0438	23.5161	-1.08954	-2.87526	5e-05	0.00031057
Zm00001d035199	6:9598516-9602960	WPP domain-associated protein	15.9436	7.49224	-1.0895	-3.65748	5e-05	0.00031057
Zm00001d011387	8:149262979-149266214	Uroporphyrinogen decarboxylase 1, chloroplastic	8.25862	3.88246	-1.08893	-2.09481	0.001	0.00424841
Zm00001d051229	4:149278219-149283886	#N/A	14.1777	6.66969	-1.08793	-2.61693	5e-05	0.00031057
Zm00001d053826	4:241891770-241932626	BEACH domain-containing protein B	12.4172	5.84156	-1.08792	-3.26804	5e-05	0.00031057
Zm00001d034679	1:299640923-299643142	#N/A	3.63846	1.71185	-1.08777	-1.93719	0.0025	0.00918832
Zm00001d029714	1:83647800-83656803	#N/A	20.8125	9.79474	-1.08737	-3.42116	5e-05	0.00031057
Zm00001d019576	7:43879918-43882845	ORM1-like protein 3	105.853	49.8281	-1.08702	-3.16365	5e-05	0.00031057
Zm00001d002489	2:13850162-13852195	.	7.78269	3.66376	-1.08694	-1.89452	0.00195	0.00746888
Zm00001d049761	4:43536809-43547307	Pumilio homolog 6, chloroplastic	21.4129	10.0815	-1.08677	-3.4197	5e-05	0.00031057
Zm00001d014900	5:67332283-67363587	Lysine-specific demethylase 5A	18.6634	8.78759	-1.08668	-3.42921	5e-05	0.00031057
Zm00001d039841	3:16413697-16414265	Putative 4-hydroxy-4-methyl-2-oxoglutarate aldolase 2	56.9722	26.8282	-1.0865	-2.22864	0.00045	0.00217427
Zm00001d001881	2:2309632-2313192	Protein DJ-1 homolog D	208.868	98.4691	-1.08485	-2.72351	5e-05	0.00031057
Zm00001d053776	4:240858679-240875478	Succinate-semialdehyde dehydrogenase, mitochondrial	34.9334	16.4805	-1.08384	-2.83512	5e-05	0.00031057
Zm00001d043959	3:214836512-214840243	Probable receptor-like protein kinase At2g42960	14.6198	6.89875	-1.08351	-2.90742	5e-05	0.00031057
Zm00001d038988	6:168296701-168299778	Uncharacterized protein At1g76660	28.9365	13.6635	-1.08256	-3.12033	5e-05	0.00031057
Zm00001d010535	8:119686698-119690647	Probable monofunctional riboflavin biosynthesis protein RIBA 3, chloroplastic	5.12125	2.4201	-1.08143	-1.87887	0.0017	0.00664599
Zm00001d017769	5:206295966-206299220	Ornithine carbamoyltransferase, chloroplastic	20.3178	9.60327	-1.08115	-2.70958	5e-05	0.00031057
Zm00001d041747	3:135810628-135815357	#N/A	10.1148	4.7846	-1.07999	-2.10291	0.00105	0.00442562
Zm00001d038266	6:152695705-152701233	.	17.2854	8.17812	-1.07972	-2.69323	5e-05	0.00031057
Zm00001d042726	3:178251718-178252839	Protein BOLA2	67.5301	31.9537	-1.07955	-2.77232	5e-05	0.00031057
Zm00001d027800	1:13809655-13811605	Pentatricopeptide repeat-containing protein At5g01110	5.84545	2.76714	-1.07892	-2.37314	0.0003	0.0015276
Zm00001d033989	1:280531583-280533830	Protein ECERIFERUM 26-like	19.5066	9.235	-1.07878	-2.29743	0.0002	0.00106912
Zm00001d013466	5:12264543-12273493	Kinesin-like protein KIN-7D, mitochondrial	30.4416	14.4133	-1.07864	-3.21841	5e-05	0.00031057
Zm00001d049834	4:47102135-47103375	Non-specific lipid transfer protein GPI-anchored 1	73.3317	34.7292	-1.07829	-2.66362	5e-05	0.00031057
Zm00001d040562	3:49886320-49902674	ABC transporter B family member 4	7.52915	3.56585	-1.07824	-2.27024	0.0002	0.00106912
Zm00001d043131	3:189941281-189945237	Transcription factor GAMYB	83.1899	39.4087	-1.0779	-3.40586	5e-05	0.00031057
Zm00001d006713	2:215022020-215022959	#N/A	71.3003	33.7992	-1.07692	-2.59872	5e-05	0.00031057
Zm00001d028391	1:33115668-33118053	Subtilisin-like protease SBT1.6	48.1614	22.8416	-1.07621	-2.8965	5e-05	0.00031057
Zm00001d016557	5:167251277-167254294	Ankyrin repeat-containing protein At5g02620	13.7817	6.53693	-1.07607	-2.43821	5e-05	0.00031057
Zm00001d019277	7:25228778-25229478	Defensin-like protein	4402.69	2088.29	-1.07606	-2.69218	5e-05	0.00031057
Zm00001d011458	8:150984718-150988729	Serine/threonine-protein kinase STY8	9.76429	4.63157	-1.07601	-2.13759	0.00015	0.000830091
Zm00001d022125	7:170837894-170846340	Exportin-T	62.3477	29.5795	-1.07574	-3.59046	5e-05	0.00031057
Zm00001d014017	5:28892600-28900562	#N/A	173.309	82.2919	-1.07452	-2.57818	5e-05	0.00031057
Zm00001d034350	1:290344742-290354306	NIPA-like protein	9.59694	4.55869	-1.07396	-2.99976	5e-05	0.00031057
Zm00001d024222	10:58034392-58036920	.	68.6031	32.6054	-1.07316	-3.21873	5e-05	0.00031057
Zm00001d014899	5:67327231-67329517	#N/A	11.8684	5.64351	-1.07246	-2.39928	0.00025	0.00130155
Zm00001d013583	5:14852171-14857086	Ras-related protein RABF2a	83.4517	39.6831	-1.07242	-3.27127	5e-05	0.00031057
Zm00001d043548	3:203546412-203550524	Phenylalanine--tRNA ligase, chloroplastic/mitochondrial	13.2778	6.31471	-1.07223	-2.89371	5e-05	0.00031057
Zm00001d003588	2:49077122-49078723	GTP-binding protein YPTM1	19.6168	9.34156	-1.07035	-1.81364	0.00205	0.0077849
Zm00001d046742	9:104063169-104067761	Ribose-phosphate pyrophosphokinase 2, chloroplastic	36.2154	17.2469	-1.07027	-3.19611	5e-05	0.00031057
Zm00001d051056	4:139235983-139238663	S-adenosylmethionine decarboxylase proenzyme	122.087	58.163	-1.06974	-3.37791	5e-05	0.00031057
Zm00001d026634	10:149201364-149204601	Tetraspanin-19	25.5023	12.1618	-1.06827	-2.67292	5e-05	0.00031057
Zm00001d044630	3:233620683-233628588	Suppressor of mec-8 and unc-52 protein homolog 2	10.0765	4.8084	-1.06737	-2.77566	5e-05	0.00031057
Zm00001d038552	6:159770091-159772070	#N/A	53.5729	25.5757	-1.06673	-2.66839	5e-05	0.00031057
Zm00001d047489	9:132231650-132237250	#N/A	67.8981	32.4161	-1.06666	-3.52982	5e-05	0.00031057
Zm00001d048109	9:150356873-150359747	.	4.36506	2.08492	-1.06601	-1.98904	0.0015	0.00597343
Zm00001d018962	7:10831565-10833533	.	24.0009	11.4676	-1.06553	-2.33091	0.00015	0.000830091
Zm00001d038838	6:165588357-165592492	Protein IQ-DOMAIN 31	51.6579	24.691	-1.06501	-3.40468	5e-05	0.00031057
Zm00001d006197	2:201329838-201334835	Kinesin-like protein KIN-7J	2.49426	1.19244	-1.06469	-1.6872	0.001	0.00424841
Zm00001d006835	2:217595881-217600202	Nuclear transcription factor Y subunit A-3	50.3894	24.0942	-1.06444	-3.08843	5e-05	0.00031057
Zm00001d045176	9:15130426-15142041	Uncharacterized WD repeat-containing protein C2A9.03	49.644	23.753	-1.06351	-3.35853	5e-05	0.00031057
Zm00001d026439	10:145882412-145897009	Protein TSS	266.51	127.558	-1.06303	-2.37804	0.0001	0.00057936
Zm00001d012203	8:170033893-170036587	UPF0301 protein Cag_1601	8.87851	4.25162	-1.0623	-2.11279	0.00075	0.00334812
Zm00001d028762	1:45868762-45896495	6-phosphofructo-2-kinase/fructose-2,6-bisphosphatase	27.3295	13.0875	-1.06227	-3.35999	5e-05	0.00031057
Zm00001d052407	4:189217457-189230120	Regulation of nuclear pre-mRNA domain-containing protein 1A	53.2735	25.5194	-1.06182	-3.39379	5e-05	0.00031057
Zm00001d028647	1:41725194-41726068	.	293.585	140.646	-1.0617	-3.10726	5e-05	0.00031057
Zm00001d044395	3:227055571-227057360	Inorganic pyrophosphatase 3	19.4818	9.33637	-1.06119	-2.07426	0.00045	0.00217427
Zm00001d014508	5:50800689-50805243	#N/A	12.9496	6.20611	-1.06114	-1.89101	5e-05	0.00031057
Zm00001d018969	7:11057171-11061083	Tryptophan synthase alpha chain	105.712	50.6824	-1.06058	-3.23116	5e-05	0.00031057
Zm00001d040613	3:53996518-53997786	Outer envelope pore protein 16-2, chloroplastic	210.009	100.696	-1.06045	-3.17587	5e-05	0.00031057
Zm00001d051900	4:173978560-173981836	Probable receptor-like protein kinase At5g15080	20.6552	9.91028	-1.05951	-2.62453	5e-05	0.00031057
Zm00001d021875	7:165254268-165257564	Probable serine/threonine-protein kinase WNK1	30.1991	14.4925	-1.0592	-3.21815	5e-05	0.00031057
Zm00001d004857	2:145114886-145119368	Transcription factor VIP1	9.64424	4.62867	-1.05907	-2.10318	0.0006	0.00276399
Zm00001d044056	3:218044052-218050489	Potassium channel AKT1	55.2235	26.5069	-1.05891	-3.35679	5e-05	0.00031057
Zm00001d008268	8:3546647-3549333	Cysteine proteinase inhibitor 12	217.614	104.491	-1.05839	-3.29488	5e-05	0.00031057
Zm00001d045320	9:18913945-18922479	Transcription elongation factor 1 homolog	30.0936	14.4594	-1.05745	-1.94689	0.0013	0.0052904
Zm00001d019040	7:13875469-13884528	Probable D-2-hydroxyglutarate dehydrogenase, mitochondrial	50.7604	24.3989	-1.05689	-3.51649	5e-05	0.00031057
Zm00001d029342	1:66637358-66648456	tRNA pseudouridine(38/39) synthase	24.0253	11.5491	-1.05678	-3.25602	5e-05	0.00031057
Zm00001d040571	3:50763984-50771779	Squamosa promoter-binding-like protein 1	7.81955	3.7639	-1.05486	-2.89859	5e-05	0.00031057
Zm00001d010271	8:106923772-106927424	Probable mediator of RNA polymerase II transcription subunit 26b	39.5159	19.0322	-1.05399	-3.19946	5e-05	0.00031057
Zm00001d044189	3:221441251-221443186	#N/A	50.8627	24.4979	-1.05395	-3.28035	5e-05	0.00031057
Zm00001d049552	4:34381360-34384226	60S ribosomal protein L34	316.999	152.761	-1.0532	-2.83898	5e-05	0.00031057
Zm00001d051682	4:166606259-166610196	DNA-directed RNA polymerases IV and V subunit 4	35.1245	16.9299	-1.0529	-2.49701	5e-05	0.00031057
Zm00001d020908	7:136238438-136243677	ATP phosphoribosyltransferase, chloroplastic	62.3764	30.0842	-1.05199	-3.31567	5e-05	0.00031057
Zm00001d038585	6:160539492-160540155	Ethylene-responsive transcription factor 11	29.2325	14.1107	-1.05078	-1.76426	0.0026	0.00948567
Zm00001d023376	10:4272267-4274843	Stem-specific protein TSJT1	3860.69	1864.87	-1.04978	-2.22244	0.0001	0.00057936
Zm00001d052697	4:197821515-197840855	.	11.6965	5.65035	-1.04966	-2.39183	0.0001	0.00057936
Zm00001d018516	5:222352423-222357010	DEAD-box ATP-dependent RNA helicase 48	3.03398	1.4657	-1.04962	-2.05742	0.0009	0.00389168
Zm00001d051959	4:175347419-175358199	Lysine-specific demethylase JMJ703	3.62578	1.75165	-1.04957	-2.02451	0.00185	0.00713834
Zm00001d038849	6:165819452-165832524	.	8.85087	4.27722	-1.04915	-2.1371	0.00095	0.00406591
Zm00001d052453	4:190322243-190347108	Heterogeneous nuclear ribonucleoprotein Q	15.4914	7.48825	-1.04877	-2.89073	5e-05	0.00031057
Zm00001d049928	4:53483181-53499946	Protein HESO1	4.64544	2.24624	-1.0483	-2.35747	0.00025	0.00130155
Zm00001d027362	1:3772167-3775082	F-box protein At4g00755	40.6847	19.6757	-1.04807	-2.88218	5e-05	0.00031057
Zm00001d038780	6:164298312-164299530	.	30.1845	14.5977	-1.04807	-2.28501	0.0002	0.00106912
Zm00001d021488	7:153824986-153861598	Rop guanine nucleotide exchange factor 3	7.44959	3.60364	-1.04771	-2.05966	0.0005	0.00237556
Zm00001d039328	3:1958217-1965694	.	9.70485	4.69721	-1.0469	-2.42968	5e-05	0.00031057
Zm00001d016684	5:172412994-172430415	1,4-alpha-glucan-branching enzyme 2, chloroplastic/amyloplastic	738.948	357.718	-1.04665	-2.36391	0.0003	0.0015276
Zm00001d039660	3:10945250-10952016	Probable cellulose synthase A catalytic subunit 1 [UDP-forming]	114.348	55.3878	-1.0458	-3.26493	5e-05	0.00031057
Zm00001d022433	7:177640220-177644128	Eukaryotic translation initiation factor 2 subunit beta	96.9854	47.0509	-1.04354	-3.33519	5e-05	0.00031057
Zm00001d019875	7:71972261-71976139	R3H domain-containing protein 2	9.39016	4.55586	-1.04343	-2.40158	0.0001	0.00057936
Zm00001d006306	2:204114306-204116336	HMG1/2-like protein	332.4	161.294	-1.04323	-3.12322	5e-05	0.00031057
Zm00001d028267	1:28638544-28642886	Alpha,alpha-trehalose-phosphate synthase [UDP-forming] 6	53.0752	25.8079	-1.04022	-2.21878	5e-05	0.00031057
Zm00001d034161	1:285417446-285425538	Serine/threonine-protein kinase SAPK8	88.6497	43.1566	-1.03853	-3.35368	5e-05	0.00031057
Zm00001d035500	6:29602356-29608198	Bifunctional bis(5'-adenosyl)-triphosphatase/adenylylsulfatase FHIT	69.1355	33.6664	-1.03812	-1.86142	0.00185	0.00713834
Zm00001d003659	2:52839412-52844416	Serine/threonine-protein kinase SAPK7	92.7409	45.1645	-1.03801	-2.86811	5e-05	0.00031057
Zm00001d045590	9:27537949-27546688	DExH-box ATP-dependent RNA helicase DExH9	19.9533	9.71739	-1.03799	-2.73275	5e-05	0.00031057
Zm00001d045220	9:16480497-16482677	.	282.75	137.753	-1.03744	-3.03923	5e-05	0.00031057
Zm00001d020367	7:109762336-109767776	Lysine-specific demethylase JMJ25	36.8449	17.9589	-1.03676	-3.45479	5e-05	0.00031057
Zm00001d039451	3:4734399-4737230	Mini-ribonuclease 3	36.3299	17.713	-1.03635	-2.76435	5e-05	0.00031057
Zm00001d049088	4:15686703-15691271	ATP-dependent (S)-NAD(P)H-hydrate dehydratase	18.3741	8.96258	-1.03569	-2.68649	5e-05	0.00031057
Zm00001d012785	8:180900184-180901786	Anthocyanidin 5,3-O-glucosyltransferase	54.7172	26.6922	-1.03558	-2.83634	5e-05	0.00031057
Zm00001d014568	5:53682575-53720004	DNA repair protein REV1	10.5511	5.14729	-1.03551	-2.74508	5e-05	0.00031057
Zm00001d040314	3:37618167-37622190	Transcription factor Pur-alpha 1	187.798	91.6161	-1.03551	-3.24006	5e-05	0.00031057
Zm00001d012042	8:167077413-167081392	Small ubiquitin-related modifier 1	549.932	268.37	-1.03503	-3.21631	5e-05	0.00031057
Zm00001d032120	1:213778925-213779774	Tetraspanin-8	67.5109	32.9647	-1.0342	-2.41368	5e-05	0.00031057
Zm00001d045358	9:19517756-19531682	Nuclear speckle RNA-binding protein B	65.8674	32.1992	-1.03254	-2.70468	5e-05	0.00031057
Zm00001d028615	1:40886064-40889048	Probable protein phosphatase 2C 31	7.81791	3.82318	-1.03201	-1.84893	0.0019	0.00730356
Zm00001d014109	5:32778093-32811691	.	40.4726	19.7942	-1.03187	-3.11518	5e-05	0.00031057
Zm00001d023265	10:1606000-1612705	#N/A	16.9242	8.28392	-1.0307	-3.09095	5e-05	0.00031057
Zm00001d000021	B73V4_ctg150:1459855-1464045	0	303.577	148.617	-1.03046	-3.144	5e-05	0.00031057
Zm00001d024698	10:83962004-83966353	Polycomb group protein FIE2	8.46665	4.14729	-1.02962	-2.36419	0.00015	0.000830091
Zm00001d022043	7:168534601-168539985	Probable mitochondrial saccharopine dehydrogenase-like oxidoreductase At5g39410	41.1871	20.1784	-1.02938	-2.74118	5e-05	0.00031057
Zm00001d040470	3:45272538-45288631	ERI1 exoribonuclease 2	125.42	61.4812	-1.02855	-3.20286	5e-05	0.00031057
Zm00001d035812	6:51702103-51706431	Translocase of chloroplast 159, chloroplastic	56.2752	27.5896	-1.02837	-3.38222	5e-05	0.00031057
Zm00001d002598	2:16406634-16410974	Ubiquitin fusion degradation protein 1 homolog	7.94425	3.8948	-1.02836	-2.38239	5e-05	0.00031057
Zm00001d022400	7:176809223-176818536	F-box protein SKIP5	42.2261	20.7186	-1.02721	-2.57294	0.00015	0.000830091
Zm00001d015504	5:94160701-94167041	Probable protein phosphatase 2C 11	9.72895	4.77391	-1.02711	-2.54989	0.00015	0.000830091
Zm00001d043183	3:190815533-190816511	Probable E3 ubiquitin-protein ligase RHC1A	68.1961	33.4664	-1.02698	-2.948	5e-05	0.00031057
Zm00001d050238	4:75293160-75301669	#N/A	63.8444	31.3352	-1.02678	-2.51227	5e-05	0.00031057
Zm00001d010852	8:130475465-130479982	Translocase of chloroplast 159, chloroplastic	80.4733	39.5095	-1.02631	-3.25434	5e-05	0.00031057
Zm00001d050081	4:64819263-64825467	.	2.68431	1.31833	-1.02584	-2.27736	0.0005	0.00237556
Zm00001d043473	3:201240322-201248398	Probable sugar phosphate/phosphate translocator At1g06470	5.25889	2.58303	-1.02569	-2.13297	0.00045	0.00217427
Zm00001d027508	1:7064042-7068106	Serine/threonine-protein kinase CDL1	7.74061	3.8033	-1.0252	-1.85379	0.0012	0.00494945
Zm00001d008620	8:14951975-14953401	.	3623.19	1780.63	-1.02487	-2.35354	5e-05	0.00031057
Zm00001d025414	10:117933308-117935123	#N/A	38.0149	18.6858	-1.02463	-2.54404	5e-05	0.00031057
Zm00001d018342	5:218888424-218892344	Probable alpha,alpha-trehalose-phosphate synthase [UDP-forming] 11	99.0989	48.7316	-1.02401	-3.17411	5e-05	0.00031057
Zm00001d040429	3:43101747-43117241	Protein argonaute 4B	42.058	20.6863	-1.0237	-1.98655	0.00105	0.00442562
Zm00001d033649	1:269615025-269618990	Beta-glucosidase 7	370.407	182.225	-1.02339	-2.93192	5e-05	0.00031057
Zm00001d009431	8:64107615-64111865	Farnesyl pyrophosphate synthase	2623.25	1291.93	-1.02183	-2.00636	0.00195	0.00746888
Zm00001d034519	1:295595607-295603239	Probable acyl-activating enzyme 18, peroxisomal	12.0888	5.95528	-1.02143	-2.76015	5e-05	0.00031057
Zm00001d032605	1:231856278-231868220	Alpha-galactosidase	241.481	118.969	-1.02132	-3.17597	5e-05	0.00031057
Zm00001d025509	10:120876060-120876869	.	81.1926	40.0048	-1.02117	-2.47917	5e-05	0.00031057
Zm00001d013221	5:6715038-6717199	Upstream activation factor subunit UAF30	19.7498	9.73212	-1.02101	-1.87198	0.00125	0.00511616
Zm00001d052742	4:199485280-199490594	DNA replication complex GINS protein PSF3	70.8731	34.9263	-1.02092	-2.71746	5e-05	0.00031057
Zm00001d020213	7:100359174-100364348	Probable receptor-like protein kinase At5g15080	53.2666	26.2514	-1.02084	-2.46082	0.0001	0.00057936
Zm00001d036602	6:94190253-94199686	Probable leucine-rich repeat receptor-like serine/threonine-protein kinase At3g14840	6.29237	3.10469	-1.01915	-2.00127	0.0011	0.00460096
Zm00001d031315	1:185871253-185874831	Uncharacterized WD repeat-containing protein C2A9.03	26.6448	13.1514	-1.01863	-2.92583	5e-05	0.00031057
Zm00001d007234	2:225336967-225339744	L-ascorbate peroxidase 2, cytosolic	226.216	111.796	-1.01684	-3.10355	5e-05	0.00031057
Zm00001d033058	1:248897011-248902427	.	15.3376	7.58042	-1.01672	-2.35116	5e-05	0.00031057
Zm00001d045938	9:47945116-47971768	.	8.76712	4.33432	-1.0163	-2.49957	5e-05	0.00031057
Zm00001d024539	10:77080622-77087754	Uncharacterized protein MJ1408	8.52002	4.21291	-1.01604	-2.39147	0.00015	0.000830091
Zm00001d004428	2:111134164-111142775	#N/A	13.6417	6.74986	-1.01509	-1.87042	0.0023	0.00857722
Zm00001d019282	7:25495546-25499141	Probable polygalacturonase	6.68644	3.30867	-1.01499	-1.92232	0.0013	0.0052904
Zm00001d043395	3:198676499-198679792	.	21.0826	10.4463	-1.01306	-3.13374	5e-05	0.00031057
Zm00001d038105	6:148054773-148060314	.	13.7658	6.82179	-1.01287	-2.28213	0.00025	0.00130155
Zm00001d054107	4:246781156-246784724	FAM10 family protein At4g22670	305.627	151.552	-1.01196	-3.09045	5e-05	0.00031057
Zm00001d015844	5:125776419-125805852	Protein ABHD18	118.587	58.8429	-1.01101	-3.17103	5e-05	0.00031057
Zm00001d042365	3:163306337-163307133	.	42.4374	21.0771	-1.00966	-1.96598	0.00105	0.00442562
Zm00001d047857	9:143574682-143579473	Selenoprotein K	43.1626	21.4728	-1.00727	-2.44814	5e-05	0.00031057
Zm00001d009751	8:79664629-79676090	Chromatin modification-related protein EAF1 B	6.86484	3.41698	-1.00651	-2.54521	5e-05	0.00031057
Zm00001d029062	1:56855735-56858177	Vicilin-like seed storage protein At2g28490	176.64	87.9805	-1.00556	-2.83323	5e-05	0.00031057
Zm00001d017895	5:209709533-209717529	Cellulose synthase-like protein E2	3.82692	1.90733	-1.00463	-2.04567	0.00065	0.00296301
Zm00001d002650	2:18176300-18185185	Protein argonaute 1B	35.3697	17.6296	-1.00452	-3.21896	5e-05	0.00031057
Zm00001d018526	5:222482004-222484957	Probable prolyl 4-hydroxylase 3	27.7606	13.8369	-1.00451	-2.18137	0.00035	0.00174885
Zm00001d014664	5:58014232-58017927	.	36.6281	18.2772	-1.00291	-2.75866	5e-05	0.00031057
Zm00001d041948	3:144968120-144974489	Vacuolar fusion protein MON1 homolog A	28.2451	14.1019	-1.00212	-3.01317	5e-05	0.00031057
Zm00001d022490	7:178662945-178667470	Xylose isomerase	16.358	8.17206	-1.00122	-2.86657	5e-05	0.00031057
Zm00001d011770	8:161262489-161265159	.	20.4146	10.1989	-1.00119	-3.0901	5e-05	0.00031057
Zm00001d042080	3:149895427-149910290	F-box protein At3g54460	6.28911	3.14287	-1.00077	-2.6746	5e-05	0.00031057
Zm00001d020046	7:88533001-88549660	Protein SAWADEE HOMEODOMAIN HOMOLOG 2	38.7909	19.3862	-1.00069	-2.45896	5e-05	0.00031057
Zm00001d049543	4:34070589-34104400	Protein CCA1	2.97074	1.48514	-1.00022	-1.71999	0.0012	0.00494945
Zm00001d005542	2:178096527-178100358	Phosphoenolpyruvate/phosphate translocator 1, chloroplastic	36.5553	73.1162	1.00011	2.57583	5e-05	0.00031057
Zm00001d002853	2:24768473-24772222	Probable beta-D-xylosidase 6	1.51802	3.03711	1.00051	1.87645	0.00175	0.00680906
Zm00001d033110	1:250436680-250439909	Inositol monophosphatase 3	5.79152	11.5879	1.00061	2.24745	0.00055	0.00257305
Zm00001d020057	7:89268034-89273487	Phosphoenolpyruvate carboxylase 2	7.13806	14.2853	1.00093	2.90117	5e-05	0.00031057
Zm00001d048040	9:148600629-148609977	.	1.0213	2.04514	1.0018	2.33149	0.00015	0.000830091
Zm00001d044283	3:224136108-224157144	Chromatin modification-related protein EAF1 B	1.55812	3.121	1.0022	2.40966	0.00015	0.000830091
Zm00001d012118	8:168419833-168430142	GPI transamidase component PIG-S	12.1477	24.3329	1.00223	3.05167	5e-05	0.00031057
Zm00001d011514	8:152940769-152945300	Iron-sulfur cluster assembly protein 1	29.9392	59.9755	1.00234	2.62672	5e-05	0.00031057
Zm00001d027768	1:13166916-13176199	Putative ion channel POLLUX-like 2	2.03869	4.08455	1.00254	2.26347	0.0003	0.0015276
Zm00001d017505	5:197812929-197823385	Transcription factor TFIIIB component B''	8.91737	17.8679	1.00268	1.84168	0.00265	0.0096319
Zm00001d042455	3:168346296-168349365	.	51.9763	104.152	1.00277	2.94478	5e-05	0.00031057
Zm00001d028125	1:23561219-23562368	UPF0496 protein 1	20.1611	40.4091	1.00311	2.33968	0.00015	0.000830091
Zm00001d011965	8:165285678-165288425	Transaldolase	33.8935	67.9469	1.0034	3.04809	5e-05	0.00031057
Zm00001d042461	3:168475310-168480329	Exocyst complex component EXO70A1	4.46586	8.95476	1.00371	1.81801	0.0026	0.00948567
Zm00001d003584	2:49052847-49056045	Putative 12-oxophytodienoate reductase 11	4.94089	9.90845	1.00389	1.91551	0.00075	0.00334812
Zm00001d000381	B73V4_ctg24:21821-27498	0	12.7519	25.5729	1.0039	2.90992	5e-05	0.00031057
Zm00001d053913	4:243607474-243612187	HVA22-like protein i	27.5274	55.2115	1.0041	2.90821	5e-05	0.00031057
Zm00001d042476	3:168999382-169003373	Uncharacterized membrane protein YuiD	9.66863	19.3953	1.00433	2.03084	0.00055	0.00257305
Zm00001d006235	2:202495263-202498539	Proteasome subunit alpha type-7-B	24.6406	49.4613	1.00527	2.56568	5e-05	0.00031057
Zm00001d038579	6:160393659-160396437	Phosphoglycerate kinase, chloroplastic	4.84185	9.72372	1.00595	2.08837	0.0005	0.00237556
Zm00001d033684	1:271169680-271173500	Phytanoyl-CoA dioxygenase 1	11.586	23.2835	1.00692	2.4452	5e-05	0.00031057
Zm00001d018477	5:221507909-221515299	.	5.70554	11.4671	1.00706	2.80638	5e-05	0.00031057
Zm00001d012662	8:178243989-178247079	#N/A	11.6251	23.3659	1.00716	2.46977	5e-05	0.00031057
Zm00001d013849	5:22609419-22613930	Trihelix transcription factor GT-2	14.7785	29.7111	1.0075	2.73649	5e-05	0.00031057
Zm00001d023646	10:13500283-13504618	Pumilio homolog 12	3.67768	7.39805	1.00835	2.53386	5e-05	0.00031057
Zm00001d043845	3:211901763-211913669	Glutamate synthase 1 [NADH], chloroplastic	41.4988	83.4842	1.00843	2.91824	5e-05	0.00031057
Zm00001d026557	10:148112844-148114736	F-box/kelch-repeat protein At5g15710	7.1076	14.3063	1.00922	2.36065	0.0001	0.00057936
Zm00001d050905	4:129476398-129478809	Dynein light chain, cytoplasmic	8.02327	16.1529	1.00953	1.9736	0.00105	0.00442562
Zm00001d051871	4:172954175-172960946	Protein neuralized	7.27014	14.6375	1.00961	2.80468	5e-05	0.00031057
Zm00001d014944	5:69327617-69329422	L-lactate dehydrogenase	36.0623	72.6372	1.01022	2.73397	5e-05	0.00031057
Zm00001d039670	3:11500059-11504969	Phospholipase D alpha 1	10.3859	20.9304	1.01097	2.92356	5e-05	0.00031057
Zm00001d004413	2:110314498-110316622	L-3-cyanoalanine synthase 2, mitochondrial	24.2228	48.8303	1.01141	2.83852	5e-05	0.00031057
Zm00001d052253	4:184810865-184812137	F-box/kelch-repeat protein At1g74510	3.21506	6.49019	1.01341	1.784	0.00235	0.00873622
Zm00001d044302	3:224594169-224597019	#N/A	4.33808	8.75766	1.01349	2.12885	0.0006	0.00276399
Zm00001d026549	10:148006439-148015145	N-acylphosphatidylethanolamine synthase	10.7826	21.7691	1.01358	2.4686	0.00015	0.000830091
Zm00001d029416	1:69619303-69628628	Acetyl-CoA acetyltransferase, cytosolic 1	37.9611	76.6499	1.01376	3.14845	5e-05	0.00031057
Zm00001d046788	9:106003315-106008536	#N/A	2.74411	5.5421	1.01409	2.21499	0.0006	0.00276399
Zm00001d011347	8:147387270-147396132	Ubiquitin-like modifier-activating enzyme atg7	5.51952	11.1479	1.01415	2.96786	5e-05	0.00031057
Zm00001d020515	7:119935929-119961121	#N/A	1.07095	2.16315	1.01425	1.9899	0.002	0.00763302
Zm00001d018528	5:222517400-222520354	Pentatricopeptide repeat-containing protein At5g38730	1.8174	3.67175	1.01459	1.93475	0.0018	0.00698199
Zm00001d014951	5:69611596-69615673	Transmembrane protein 120B	21.4679	43.4003	1.01553	2.84612	5e-05	0.00031057
Zm00001d016723	5:174196061-174196472	Histone H3.2	129.141	261.097	1.01564	2.34542	0.0002	0.00106912
Zm00001d037108	6:112471488-112475753	3-oxoacyl-[acyl-carrier-protein] synthase I, chloroplastic	37.7034	76.2522	1.01609	3.12681	5e-05	0.00031057
Zm00001d048155	9:151074025-151076814	ADP-ribosylation factor-like protein 8a	5.81972	11.7735	1.01652	2.01282	0.0012	0.00494945
Zm00001d015767	5:118084091-118085317	#N/A	14.8087	29.9629	1.01673	1.95813	0.0012	0.00494945
Zm00001d043158	3:190364999-190368453	Tubulin beta-6 chain	74.6122	150.974	1.01682	3.20339	5e-05	0.00031057
Zm00001d048412	9:155819417-155824302	Transcription factor-like protein DPB	4.02904	8.15981	1.0181	2.28335	0.0002	0.00106912
Zm00001d053453	4:232245966-232253821	Phosphoenolpyruvate carboxylase, housekeeping isozyme	12.5354	25.3995	1.0188	2.59122	5e-05	0.00031057
Zm00001d029393	1:68678958-68683422	Cytochrome c oxidase subunit 6b-1	63.2342	128.16	1.01917	3.15433	5e-05	0.00031057
Zm00001d048271	9:153586354-153591283	Proteasome subunit alpha type-6	36.0093	72.9829	1.01919	3.0796	5e-05	0.00031057
Zm00001d039718	3:12973561-12977694	Mini-chromosome maintenance complex-binding protein	7.69344	15.5943	1.01932	2.94346	5e-05	0.00031057
Zm00001d034278	1:288354742-288358020	Protein JASON	4.88363	9.90202	1.01977	2.3055	5e-05	0.00031057
Zm00001d023813	10:22948295-22951424	Probable polygalacturonase	11.6597	23.6418	1.01981	2.71224	5e-05	0.00031057
Zm00001d005587	2:179826384-179831450	Phosphatidate cytidylyltransferase 1	2.46918	5.0067	1.01983	2.01575	0.00085	0.00371002
Zm00001d033391	1:261539894-261541635	#N/A	15.0317	30.4852	1.0201	2.39362	0.00015	0.000830091
Zm00001d004019	2:76032745-76036570	Stearoyl-[acyl-carrier-protein] 9-desaturase 5, chloroplastic	29.3277	59.5658	1.02222	2.88288	5e-05	0.00031057
Zm00001d030701	1:154400173-154406420	Probable ribose-5-phosphate isomerase 1	4.60497	9.35903	1.02317	2.68095	5e-05	0.00031057
Zm00001d013108	5:4776322-4780168	#N/A	186.275	378.71	1.02366	3.12395	5e-05	0.00031057
Zm00001d026691	10:150051954-150061708	DDB1- and CUL4-associated factor homolog 1	15.3588	31.2401	1.02433	3.08381	5e-05	0.00031057
Zm00001d052113	4:180167724-180171484	Replication protein A 70 kDa DNA-binding subunit A	3.33603	6.79006	1.02529	2.50845	5e-05	0.00031057
Zm00001d031542	1:193753194-193766058	Serrate RNA effector molecule	6.70524	13.6483	1.02536	3.00921	5e-05	0.00031057
Zm00001d017937	5:210385309-210401948	S-adenosylmethionine carrier 1, chloroplastic/mitochondrial	3.8666	7.87681	1.02655	2.12671	0.0004	0.00196604
Zm00001d053308	4:225414700-225429993	#N/A	108.995	222.358	1.02862	2.73947	5e-05	0.00031057
Zm00001d017171	5:187855557-187860206	Outer envelope pore protein 37, chloroplastic	3.58808	7.32846	1.0303	2.08019	0.0008	0.00353513
Zm00001d033655	1:269775415-269799268	Mitogen-activated protein kinase kinase kinase 1	7.85732	16.0593	1.0313	2.75313	5e-05	0.00031057
Zm00001d043432	3:199636304-199641922	Reticulon-4-interacting protein 1, mitochondrial	5.20755	10.6441	1.03137	2.24082	0.0005	0.00237556
Zm00001d007173	2:223808166-223823179	B3 domain-containing protein Os07g0679700	1.33354	2.72632	1.0317	2.09097	0.0005	0.00237556
Zm00001d019473	7:35502928-35504870	60S ribosomal protein L8	21.9153	44.8051	1.03172	2.62704	5e-05	0.00031057
Zm00001d021385	7:150624323-150635185	NADPH--cytochrome P450 reductase	4.56838	9.34332	1.03225	2.65317	0.0001	0.00057936
Zm00001d030858	1:163697125-163697959	Zinc finger protein 1	28.0742	57.4224	1.03237	2.2399	0.00035	0.00174885
Zm00001d053282	4:223911514-223915010	Protein O-linked-mannose beta-1,4-N-acetylglucosaminyltransferase 2	14.5532	29.7838	1.03319	3.0759	5e-05	0.00031057
Zm00001d008218	8:1585464-1591623	Coatomer subunit beta-2	22.4487	45.9426	1.0332	3.29086	5e-05	0.00031057
Zm00001d009407	8:63278350-63281466	Uncharacterized protein ycf36	6.58465	13.4803	1.03367	2.27548	0.00015	0.000830091
Zm00001d005708	2:184109211-184113653	Protein EDS1L	2.64397	5.41529	1.03433	2.11834	0.0009	0.00389168
Zm00001d006333	2:204940529-204943456	Organic cation/carnitine transporter 7	2.2192	4.54703	1.03488	1.9487	0.00265	0.0096319
Zm00001d006080	2:197575105-197579019	Oleoyl-acyl carrier protein thioesterase 1, chloroplastic	14.0495	28.7951	1.0353	2.8761	5e-05	0.00031057
Zm00001d047750	9:140834065-140837709	Probable glucuronosyltransferase Os03g0287800	9.69884	19.8845	1.03576	1.97131	0.00105	0.00442562
Zm00001d047461	9:130893462-130896263	Mitochondrial fission 1 protein A	5.5002	11.2814	1.03639	2.009	0.00135	0.00545852
Zm00001d041710	3:134444987-134458133	Glutathione synthetase, chloroplastic	3.15113	6.46699	1.03723	2.37377	5e-05	0.00031057
Zm00001d014674	5:58597634-58609068	UDP-sugar pyrophosphorylase	1.24427	2.55759	1.03949	1.96393	0.0017	0.00664599
Zm00001d028867	1:49060953-49063784	.	24.152	49.6458	1.03953	2.39022	0.0001	0.00057936
Zm00001d027383	1:4110010-4114671	Hydroxymethylglutaryl-CoA synthase	5.69047	11.7176	1.04206	2.43254	5e-05	0.00031057
Zm00001d025924	10:133844871-133846261	Salutaridine reductase	115.401	237.713	1.04256	3.09442	5e-05	0.00031057
Zm00001d030158	1:109418603-109421962	Protein NRT1/ PTR FAMILY 8.3	10.3825	21.3953	1.04315	2.7947	5e-05	0.00031057
Zm00001d012844	5:1060872-1065790	26S proteasome non-ATPase regulatory subunit 12 homolog A	61.7366	127.261	1.0436	1.83725	0.00135	0.00545852
Zm00001d005981	2:194592767-194597099	Probable galacturonosyltransferase 4	19.1258	39.4279	1.04369	3.34117	5e-05	0.00031057
Zm00001d039859	3:16955373-16956401	.	110.404	227.617	1.04381	2.95607	5e-05	0.00031057
Zm00001d022460	7:178138827-178142500	Pectinesterase 3	7.96292	16.4205	1.04413	2.35757	0.0001	0.00057936
Zm00001d041775	3:137091202-137104652	2-dehydro-3-deoxyphosphooctonate aldolase	6.41821	13.2367	1.0443	2.42412	0.00015	0.000830091
Zm00001d054002	4:244902406-244906004	.	6.42342	13.2586	1.04552	2.90241	5e-05	0.00031057
Zm00001d029084	1:57446545-57452595	Fumarate hydratase 1, mitochondrial	8.42615	17.3931	1.04557	3.0481	5e-05	0.00031057
Zm00001d038808	6:164864361-164873057	Vesicle-fusing ATPase	18.54	38.2748	1.04576	3.47648	5e-05	0.00031057
Zm00001d035526	6:31115180-31121906	Kinesin-like protein KIN-5A	7.57276	15.6354	1.04593	2.99036	5e-05	0.00031057
Zm00001d019644	7:47868259-47872065	Protein TRIGALACTOSYLDIACYLGLYCEROL 3, chloroplastic	3.71385	7.66923	1.04616	2.38056	5e-05	0.00031057
Zm00001d011373	8:148912003-148917649	Extra-large guanine nucleotide-binding protein 1	13.415	27.7102	1.04657	3.42451	5e-05	0.00031057
Zm00001d017837	5:208273342-208273918	#N/A	61.7599	127.593	1.04681	2.58019	5e-05	0.00031057
Zm00001d013007	5:3149160-3151741	ADP-ribosylation factor	200.96	415.227	1.04699	3.18713	5e-05	0.00031057
Zm00001d024633	10:81347902-81352638	Monodehydroascorbate reductase 5, mitochondrial	8.86258	18.3136	1.04712	1.80403	0.00225	0.00841279
Zm00001d006179	2:200782470-200786352	RHOMBOID-like protein 2	3.53939	7.31685	1.04772	1.88576	0.0017	0.00664599
Zm00001d023468	10:6631685-6632327	NDR1/HIN1-like protein 12	72.968	150.904	1.0483	2.73555	5e-05	0.00031057
Zm00001d012815	5:776418-787466	Protein EXPORTIN 1A	7.9461	16.4336	1.04833	2.96893	5e-05	0.00031057
Zm00001d010620	8:122052964-122057327	.	3.09696	6.40955	1.04937	2.23749	0.0003	0.0015276
Zm00001d039455	3:4833806-4837335	PRA1 family protein F3	27.1339	56.181	1.04998	2.49741	0.0002	0.00106912
Zm00001d005297	2:168256463-168265313	Protein LONGIFOLIA 1	3.47884	7.20652	1.0507	1.99596	0.0006	0.00276399
Zm00001d019217	7:22231047-22241642	Uncharacterized aarF domain-containing protein kinase At5g05200, chloroplastic	6.66962	13.8171	1.05078	2.82108	5e-05	0.00031057
Zm00001d005795	2:188910704-188919424	E3 ubiquitin-protein ligase AIP2	23.7045	49.1204	1.05116	2.83438	5e-05	0.00031057
Zm00001d053848	4:242177397-242180739	F-box/FBD/LRR-repeat protein At1g78750	1.25333	2.59806	1.05167	2.08772	0.00075	0.00334812
Zm00001d044156	3:220677999-220680745	Cytochrome P450 72A14	49.7705	103.171	1.05168	2.75217	5e-05	0.00031057
Zm00001d045393	9:20521785-20527702	.	8.9783	18.6174	1.05214	1.94691	0.0012	0.00494945
Zm00001d013384	5:10164773-10165837	.	25.4677	52.887	1.05425	2.44377	5e-05	0.00031057
Zm00001d023655	10:13756072-13759615	15-cis-zeta-carotene isomerase, chloroplastic	3.83296	7.95979	1.05427	1.98367	0.0014	0.00563084
Zm00001d048836	4:6152290-6155488	#N/A	2.64664	5.49786	1.05471	1.84078	0.00255	0.00933354
Zm00001d039090	6:169788529-169791254	GTP-binding nuclear protein Ran-2	134.439	279.323	1.05498	3.17044	5e-05	0.00031057
Zm00001d034573	1:296609990-296611334	#N/A	7.90747	16.4317	1.05519	2.10214	0.00035	0.00174885
Zm00001d028742	1:44975069-44978277	Omega-3 fatty acid desaturase, chloroplastic	5.93169	12.3275	1.05537	2.29977	0.0003	0.0015276
Zm00001d042643	3:175222613-175226605	Uncharacterized protein slp1	3.90176	8.111	1.05576	2.70852	5e-05	0.00031057
Zm00001d023371	10:4190679-4193349	.	4.85939	10.1051	1.05623	2.0742	0.00115	0.004782
Zm00001d025892	10:133211004-133217035	Lactation elevated protein 1	9.85961	20.5029	1.05623	2.84657	5e-05	0.00031057
Zm00001d029582	1:77813905-77815328	3-oxo-Delta(4,5)-steroid 5-beta-reductase	76.9575	160.05	1.05639	3.17615	5e-05	0.00031057
Zm00001d036795	6:101158380-101162048	Protein N-terminal asparagine amidohydrolase	5.9152	12.3086	1.05716	2.4976	5e-05	0.00031057
Zm00001d048731	4:4464762-4469275	Kinesin-like protein KIN-14U	4.79764	9.99146	1.05837	2.21597	5e-05	0.00031057
Zm00001d050153	4:69519896-69526796	Reticulon-like protein B21	8.21843	17.1177	1.05856	2.60675	5e-05	0.00031057
Zm00001d027317	1:2818954-2826611	Homeobox-leucine zipper protein HOX10	4.67314	9.73565	1.05889	2.76095	5e-05	0.00031057
Zm00001d020973	7:138248895-138256381	Chaperone protein dnaJ 10	2.33772	4.87036	1.05892	2.10347	0.0003	0.0015276
Zm00001d027854	1:15301582-15306925	Sucrose transport protein SUT1	3.93424	8.19954	1.05946	2.00526	0.0004	0.00196604
Zm00001d010180	8:103282260-103285386	3-hydroxyacyl-[acyl-carrier-protein] dehydratase FabZ	6.44652	13.4358	1.05949	2.07974	0.0004	0.00196604
Zm00001d026031	10:136405186-136407606	#N/A	10.3988	21.6779	1.0598	2.04236	0.00075	0.00334812
Zm00001d030694	1:153742903-153749377	Importin subunit beta-1	15.1717	31.6401	1.06037	3.36224	5e-05	0.00031057
Zm00001d008512	8:11119066-11126014	ABC transporter G family member 7	1.09647	2.28701	1.0606	1.98877	0.001	0.00424841
Zm00001d042585	3:172744226-172749340	Protein root UVB sensitive 6	14.0703	29.3628	1.06134	3.19431	5e-05	0.00031057
Zm00001d022510	7:179105093-179113606	4-alpha-glucanotransferase DPE2	6.52107	13.614	1.06192	2.353	0.00015	0.000830091
Zm00001d012108	8:168364889-168371205	Putative ribonuclease H protein At1g65750	20.5932	43.0096	1.06249	2.94551	5e-05	0.00031057
Zm00001d012699	8:178819718-178826711	Plant cysteine oxidase 5	11.1709	23.3498	1.06366	2.91958	5e-05	0.00031057
Zm00001d019505	7:38142424-38145129	SNAP25 homologous protein SNAP33	14.607	30.5329	1.0637	2.76776	5e-05	0.00031057
Zm00001d042950	3:184713009-184714362	Protein GPR107	30.7632	64.3104	1.06385	2.90687	5e-05	0.00031057
Zm00001d018429	5:220588215-220589696	Phosphoenolpyruvate carboxylase kinase 2	7.61116	15.9155	1.06424	1.93125	0.0011	0.00460096
Zm00001d012121	8:168477739-168480878	Tetratricopeptide repeat protein 1	16.2392	34.0089	1.06643	2.85321	5e-05	0.00031057
Zm00001d015842	5:125657036-125657552	Zinc finger A20 and AN1 domain-containing stress-associated protein 4	90.2144	188.95	1.06658	2.81145	5e-05	0.00031057
Zm00001d018776	7:4961660-4980931	Myb-like protein L	2.45802	5.15425	1.06826	2.92715	5e-05	0.00031057
Zm00001d044665	3:234410698-234417575	V-type proton ATPase subunit C	9.3807	19.6718	1.06837	2.58941	5e-05	0.00031057
Zm00001d034990	6:1282753-1285886	Probable polygalacturonase	17.5554	36.8254	1.06879	2.83169	5e-05	0.00031057
Zm00001d015658	5:103850841-103855288	Sodium-coupled neutral amino acid transporter 2	6.23523	13.0842	1.06931	2.82964	5e-05	0.00031057
Zm00001d016411	5:161327142-161330435	Plastidic ATP/ADP-transporter	26.7112	56.0701	1.06979	3.28469	5e-05	0.00031057
Zm00001d016491	5:164555550-164557626	40S ribosomal protein S27	45.5574	95.6567	1.07018	2.57591	5e-05	0.00031057
Zm00001d020237	7:101648948-101652728	Putative hydrolase C777.06c	9.54579	20.049	1.07059	2.67417	5e-05	0.00031057
Zm00001d033981	1:279982394-279986186	ATP-sulfurylase 3, chloroplastic	24.3305	51.1074	1.07077	3.13366	5e-05	0.00031057
Zm00001d042107	3:150853651-150855137	Probable calcium-binding protein CML10	12.3219	25.8833	1.0708	1.96978	0.00205	0.0077849
Zm00001d038274	6:153040257-153042534	.	14.9644	31.4431	1.07121	2.78312	5e-05	0.00031057
Zm00001d011854	8:162915394-162925930	Villin-2	15.5885	32.7623	1.07156	2.49625	0.0001	0.00057936
Zm00001d014317	5:40685898-40686909	#N/A	17.1281	36.0159	1.07227	2.10848	0.0009	0.00389168
Zm00001d050383	4:85015211-85019176	Dihydrolipoyllysine-residue acetyltransferase component 4 of pyruvate dehydrogenase complex, chloroplastic	24.9879	52.5438	1.07229	3.19767	5e-05	0.00031057
Zm00001d034714	1:300523647-300526448	Non-specific phospholipase C1	30.6122	64.3837	1.07259	3.24291	5e-05	0.00031057
Zm00001d024571	10:78696501-78699043	60S ribosomal protein L34	181.956	382.747	1.0728	3.11472	5e-05	0.00031057
Zm00001d000184	B73V4_ctg181:314007-317339	0	5.56418	11.7049	1.07287	2.3326	0.00015	0.000830091
Zm00001d027512	1:7148371-7152568	60S ribosomal protein L5-1	22.1589	46.6191	1.07303	3.00698	5e-05	0.00031057
Zm00001d028903	1:50231398-50235984	.	9.16286	19.2783	1.07311	2.79218	5e-05	0.00031057
Zm00001d021433	7:152095386-152097351	High mobility group B protein 2	17.6778	37.2604	1.0757	2.56054	5e-05	0.00031057
Zm00001d027622	1:9228762-9233305	Uncharacterized protein sll0103	2.3095	4.86785	1.0757	2.18975	0.00045	0.00217427
Zm00001d008374	8:6699138-6703444	Sugar transporter ERD6-like 5	2.67972	5.6513	1.0765	2.21882	0.0006	0.00276399
Zm00001d033503	1:264688456-264693791	Probable E3 ubiquitin-protein ligase BAH1-like 1	2.82585	5.96568	1.078	3.0222	5e-05	0.00031057
Zm00001d044921	9:7253980-7254973	2-hydroxyisoflavanone dehydratase	11.4035	24.077	1.07817	1.98015	0.00145	0.00579593
Zm00001d025977	10:135065679-135068785	Probable metal-nicotianamine transporter YSL16	7.85946	16.5972	1.07844	2.49635	0.0001	0.00057936
Zm00001d034131	1:284703136-284704057	.	8.20135	17.3232	1.07877	2.04012	0.0011	0.00460096
Zm00001d019461	7:34780056-34788091	DnaJ homolog subfamily C member 18	2.43541	5.14426	1.0788	2.77652	5e-05	0.00031057
Zm00001d013254	5:7152542-7158397	ABC transporter B family member 25	5.61132	11.8528	1.07881	2.84266	5e-05	0.00031057
Zm00001d021400	7:151056578-151061402	HSP-interacting protein	2.33538	4.9335	1.07895	2.51485	5e-05	0.00031057
Zm00001d025749	10:128281742-128287294	Inositol transporter 1	2.3086	4.87913	1.0796	2.01884	0.00185	0.00713834
Zm00001d031561	1:194339693-194342403	Transcription factor bHLH78	10.3535	21.8946	1.08046	2.4324	0.0001	0.00057936
Zm00001d044202	3:221800238-221803684	.	6.38704	13.5107	1.08089	2.15978	0.00035	0.00174885
Zm00001d016694	5:172814185-172820085	Poly [ADP-ribose] polymerase 3	7.75086	16.396	1.08092	2.87584	5e-05	0.00031057
Zm00001d010783	8:127618301-127620447	Nuclear pore complex protein NUP35	8.71665	18.4456	1.08143	2.2321	0.00025	0.00130155
Zm00001d026211	10:140995439-141000793	UV-B-induced protein At3g17800, chloroplastic	2.32938	4.93153	1.08209	2.12035	0.0005	0.00237556
Zm00001d015319	5:84424634-84426697	F-box/FBD/LRR-repeat protein At1g78750	32.9824	69.8459	1.08248	3.19975	5e-05	0.00031057
Zm00001d028834	1:48128231-48128960	Peroxisomal membrane protein 11-3	13.3945	28.4101	1.08476	1.84117	0.00265	0.0096319
Zm00001d010525	8:119256794-119260935	Kinesin-like protein KIN-10C	1.53218	3.25048	1.08506	1.99522	0.0015	0.00597343
Zm00001d029976	1:97209568-97214377	Calcineurin B-like protein 1	17.188	36.4675	1.08521	3.1116	5e-05	0.00031057
Zm00001d040348	3:39314835-39322904	#N/A	10.9594	23.2609	1.08574	2.20461	0.0004	0.00196604
Zm00001d033818	1:274726909-274729148	Calcium load-activated calcium channel	18.7003	39.6969	1.08596	2.54458	5e-05	0.00031057
Zm00001d031979	1:208400550-208401401	Dihydroneopterin aldolase 1	22.218	47.1801	1.08645	2.37972	0.0001	0.00057936
Zm00001d047282	9:125433092-125435673	Protein SPIRAL1-like 1	76.1716	161.879	1.08759	2.35281	0.0001	0.00057936
Zm00001d046652	9:100613422-100616851	.	12.8407	27.2921	1.08776	2.62583	5e-05	0.00031057
Zm00001d013334	5:8847569-8853272	Folate transporter 1, chloroplastic	3.10818	6.6075	1.08804	1.8646	0.0025	0.00918832
Zm00001d041814	3:139023564-139024817	Probable adenylate kinase 1, chloroplastic	12.1503	25.8307	1.08809	2.21136	0.0003	0.0015276
Zm00001d039590	3:8533848-8540284	#N/A	3.50715	7.45693	1.08828	2.60072	5e-05	0.00031057
Zm00001d017503	5:197730624-197735534	.	21.7007	46.1587	1.08886	2.32263	0.0002	0.00106912
Zm00001d012561	8:176655419-176657307	Cystatin-1	8.54593	18.1808	1.08911	2.10388	0.0003	0.0015276
Zm00001d051589	4:163588759-163592644	Protein KINESIN LIGHT CHAIN-RELATED 2	4.20917	8.95657	1.08941	2.83239	5e-05	0.00031057
Zm00001d030527	1:141837962-141840802	SEC1 family transport protein SLY1	4.2875	9.12428	1.08957	2.53159	5e-05	0.00031057
Zm00001d015618	5:101493552-101498009	Probable cinnamyl alcohol dehydrogenase	4.50786	9.59331	1.08959	1.94722	0.00135	0.00545852
Zm00001d018384	5:219713467-219718521	DNA replication licensing factor MCM5	3.76719	8.0201	1.09013	2.80821	5e-05	0.00031057
Zm00001d019045	7:14093200-14093758	Histone H2A	298.146	635.128	1.09103	3.31269	5e-05	0.00031057
Zm00001d037017	6:109255099-109256890	Cationic amino acid transporter 8, vacuolar	8.28787	17.6622	1.0916	2.05871	0.00085	0.00371002
Zm00001d049510	4:32826639-32833033	Probable mixed-linked glucan synthase 6	101.219	215.714	1.09164	3.30714	5e-05	0.00031057
Zm00001d020450	7:115280590-115282707	60S ribosomal protein L34	124.8	265.997	1.09179	3.40558	5e-05	0.00031057
Zm00001d033751	1:272898683-272912425	Dynamin-related protein 1C	6.6733	14.2242	1.09188	3.14313	5e-05	0.00031057
Zm00001d043662	3:206196919-206222520	Alpha-amylase 3, chloroplastic	3.34956	7.1402	1.09199	2.90769	5e-05	0.00031057
Zm00001d048417	9:155903727-155905521	FAD-dependent urate hydroxylase	6.897	14.7057	1.09233	2.0471	0.00085	0.00371002
Zm00001d054004	4:245028337-245031545	.	5.52795	11.8007	1.09406	2.48039	0.00015	0.000830091
Zm00001d039211	6:172597216-172607437	Notchless protein homolog	9.71284	20.7354	1.09413	3.0377	5e-05	0.00031057
Zm00001d049945	4:54603428-54607210	60S ribosomal protein L10a	38.1031	81.4198	1.09547	2.35434	5e-05	0.00031057
Zm00001d028820	1:47593454-47595021	DnaJ homolog subfamily B member 6-A	102.662	219.431	1.09586	3.40271	5e-05	0.00031057
Zm00001d011580	8:154898653-154911041	Protein MALE DISCOVERER 2	3.05096	6.52386	1.09647	2.61586	5e-05	0.00031057
Zm00001d027769	1:13177254-13183634	Glutathione reductase, chloroplastic (Fragment)	10.482	22.4166	1.09666	3.17463	5e-05	0.00031057
Zm00001d033158	1:252436181-252443465	Lysine-specific demethylase JMJ25	8.43104	18.0324	1.09681	3.50303	5e-05	0.00031057
Zm00001d036707	6:98270415-98281382	Ubiquitin carboxyl-terminal hydrolase 18	5.60436	11.9922	1.09748	3.32746	5e-05	0.00031057
Zm00001d012034	8:166861043-166902381	Phosphatidylinositol N-acetylglucosaminyltransferase subunit Q	1.49886	3.20804	1.09783	2.24879	0.0008	0.00353513
Zm00001d051014	4:136927071-136932493	CMP-sialic acid transporter 5	3.72998	7.98898	1.09884	2.48476	0.0001	0.00057936
Zm00001d006667	2:213889758-213895829	Probable succinate--CoA ligase [ADP-forming] subunit alpha, mitochondrial	47.1651	101.032	1.09902	2.61063	5e-05	0.00031057
Zm00001d012562	8:176682154-176683237	Probable sugar phosphate/phosphate translocator At2g25520	12.0715	25.8721	1.09979	2.01394	0.0011	0.00460096
Zm00001d048503	9:157456647-157467635	.	19.5125	41.8265	1.10002	2.94358	5e-05	0.00031057
Zm00001d018627	7:1335709-1339124	Sugar carrier protein C	5.80543	12.4479	1.10043	1.91499	0.00085	0.00371002
Zm00001d047345	9:127012122-127014219	Uncharacterized protein ycf36	28.5663	61.2697	1.10086	2.97738	5e-05	0.00031057
Zm00001d045610	9:28669343-28671875	Homogentisate 1,2-dioxygenase	14.7319	31.5995	1.10096	2.87622	5e-05	0.00031057
Zm00001d042930	3:184418116-184418903	Histone H2B.2	46.243	99.1926	1.101	2.9427	5e-05	0.00031057
Zm00001d042055	3:148888994-148896597	Protein CLT3, chloroplastic	14.5401	31.1925	1.10116	3.29321	5e-05	0.00031057
Zm00001d012978	5:2663421-2665225	40S ribosomal protein S23	39.4193	84.5658	1.10117	2.85311	5e-05	0.00031057
Zm00001d036293	6:82193274-82194916	Caffeoyl-CoA O-methyltransferase 1	107.733	231.125	1.10121	3.37782	5e-05	0.00031057
Zm00001d002842	2:24286535-24291225	Remorin	21.1032	45.2873	1.10165	2.99738	5e-05	0.00031057
Zm00001d004993	2:152731212-152742157	Splicing factor U2AF-associated protein 2	4.26728	9.16144	1.10226	2.98918	5e-05	0.00031057
Zm00001d034795	1:302374918-302378019	Prohibitin-1, mitochondrial	100.673	216.169	1.10248	3.42475	5e-05	0.00031057
Zm00001d037025	6:109439804-109442268	GDSL esterase/lipase At5g45910	2.78353	5.98271	1.10389	1.77319	0.0024	0.00888499
Zm00001d040067	3:25757940-25760426	.	22.8958	49.2124	1.10394	3.12346	5e-05	0.00031057
Zm00001d025834	10:131395393-131399206	Probable inositol transporter 2	3.54605	7.62198	1.10395	2.13267	0.0002	0.00106912
Zm00001d033766	1:273077944-273082841	Binding partner of ACD11 1	8.35095	17.962	1.10494	2.52368	5e-05	0.00031057
Zm00001d033480	1:263882341-263887652	5-methyltetrahydropteroyltriglutamate--homocysteine methyltransferase 1	13.1592	28.3112	1.1053	3.28539	5e-05	0.00031057
Zm00001d036462	6:89295381-89304942	Protein EFR3 homolog B	7.60837	16.37	1.1054	2.2223	0.00025	0.00130155
Zm00001d035872	6:57907270-57912196	Uncharacterized protein At4g28440	16.235	34.9359	1.1056	2.4678	5e-05	0.00031057
Zm00001d013747	5:19178318-19179668	Presenilin-like protein At2g29900	4.26169	9.17521	1.10632	1.82634	0.0025	0.00918832
Zm00001d025722	10:127556444-127565804	ATP-dependent DNA helicase Q-like 5	2.35706	5.07468	1.10633	2.71729	5e-05	0.00031057
Zm00001d046483	9:91945845-91949117	Dehydrogenase/reductase SDR family member 12	2.8102	6.05241	1.10683	2.14087	0.0015	0.00597343
Zm00001d008333	8:5562983-5567351	Syntaxin-22	37.399	80.5822	1.10746	2.87646	5e-05	0.00031057
Zm00001d048394	9:155579013-155580382	Cyclin-dependent kinases regulatory subunit 1	17.8321	38.4293	1.10773	2.5246	5e-05	0.00031057
Zm00001d034072	1:283163310-283164753	UDP-glucose 6-dehydrogenase 4	82.7718	178.415	1.10803	3.41919	5e-05	0.00031057
Zm00001d028653	1:41833737-41838204	UDP-glucuronic acid decarboxylase 6	25.8158	55.6688	1.10862	3.37518	5e-05	0.00031057
Zm00001d020429	7:113489951-113494456	Cysteine-rich receptor-like protein kinase 10	11.3115	24.3949	1.10879	2.50718	5e-05	0.00031057
Zm00001d049948	4:54772591-54776331	Probable uridine nucleosidase 1	6.20973	13.3934	1.10892	2.71438	5e-05	0.00031057
Zm00001d003220	2:36506463-36511337	.	22.6764	48.925	1.10938	3.5098	5e-05	0.00031057
Zm00001d045268	9:17495379-17496111	Histone H3.2	73.4876	158.643	1.11021	3.04008	5e-05	0.00031057
Zm00001d034279	1:288410719-288412651	#N/A	6.99734	15.1098	1.1106	2.22173	5e-05	0.00031057
Zm00001d023501	10:7467250-7471987	DEAD-box ATP-dependent RNA helicase 27	7.18492	15.5195	1.11103	3.14243	5e-05	0.00031057
Zm00001d053070	4:212271640-212301061	DNA polymerase delta catalytic subunit	3.2524	7.03035	1.11209	3.20747	5e-05	0.00031057
Zm00001d038625	6:161162524-161167432	Sulfite reductase [ferredoxin], chloroplastic	53.5727	115.844	1.11262	3.5963	5e-05	0.00031057
Zm00001d021087	7:142484401-142493269	ADP-ribosylation factor GTPase-activating protein AGD3	14.3116	30.9672	1.11356	3.65061	5e-05	0.00031057
Zm00001d044281	3:223977952-224011953	Chromatin modification-related protein EAF1 B	1.77288	3.83676	1.11379	2.65151	0.0001	0.00057936
Zm00001d039674	3:11575058-11577604	Phosphoenolpyruvate/phosphate translocator 3, chloroplastic	9.09606	19.6906	1.11419	2.40283	5e-05	0.00031057
Zm00001d012647	8:177797194-177800097	Coenzyme Q-binding protein COQ10 homolog, mitochondrial	13.5298	29.2902	1.11427	2.8222	5e-05	0.00031057
Zm00001d011650	8:157470983-157471706	.	44.3889	96.1204	1.11464	2.76379	5e-05	0.00031057
Zm00001d014065	5:31254128-31259724	Eukaryotic translation initiation factor isoform 4E-2	23.6042	51.1196	1.11484	3.23146	5e-05	0.00031057
Zm00001d031447	1:190284562-190291949	ABC transporter C family member 13	4.25177	9.21322	1.11564	3.24992	5e-05	0.00031057
Zm00001d006040	2:196142202-196146694	3-hydroxy-3-methylglutaryl-coenzyme A reductase	18.3674	39.8139	1.11613	3.35363	5e-05	0.00031057
Zm00001d038076	6:146985213-146990181	UDP-D-xylose:L-fucose alpha-1,3-D-xylosyltransferase MGP4	9.20646	19.9566	1.11614	2.59987	5e-05	0.00031057
Zm00001d030601	1:147622994-147641527	Protein ABHD17C	12.903	27.9781	1.1166	2.94786	5e-05	0.00031057
Zm00001d017395	5:194466961-194478849	Thylakoid lumenal protein TL20.3, chloroplastic	2.70361	5.86621	1.11754	2.08682	0.0005	0.00237556
Zm00001d022560	7:180055177-180064698	Lon protease homolog, mitochondrial	5.45044	11.8289	1.11787	3.33946	5e-05	0.00031057
Zm00001d022438	7:177702900-177704949	Ubiquinol-cytochrome c reductase complex 6.7 kDa protein	132.122	286.766	1.11801	3.47541	5e-05	0.00031057
Zm00001d009960	8:92432743-92434990	Acyl transferase 7	17.5093	38.0309	1.11905	3.00769	5e-05	0.00031057
Zm00001d023534	10:9078176-9084700	5-formyltetrahydrofolate cyclo-ligase-like protein COG0212	6.47076	14.0681	1.12042	2.40118	5e-05	0.00031057
Zm00001d040766	3:64552841-64556161	Protein disulfide isomerase-like 2-2	71.7676	156.031	1.12043	3.56662	5e-05	0.00031057
Zm00001d022251	7:173630339-173633616	Ras-related protein RABA5a	2.96371	6.44736	1.1213	2.20295	0.00035	0.00174885
Zm00001d020770	7:131820906-131823805	.	8.50073	18.4979	1.12171	2.6511	5e-05	0.00031057
Zm00001d002523	2:14724860-14725891	.	12.0527	26.2328	1.12202	2.36625	0.0003	0.0015276
Zm00001d033903	1:278102122-278108344	Zinc finger BED domain-containing protein RICESLEEPER 2	1.96409	4.27603	1.12241	2.4502	0.0001	0.00057936
Zm00001d012659	8:178077108-178082439	Transmembrane protein 56	3.46116	7.53994	1.1233	2.20545	0.0004	0.00196604
Zm00001d021880	7:165322978-165328364	CMP-sialic acid transporter 2	4.9783	10.8464	1.12349	2.79586	5e-05	0.00031057
Zm00001d026642	10:149278821-149280179	Elicitor-responsive protein 3	26.7433	58.2814	1.12386	2.63458	5e-05	0.00031057
Zm00001d005828	2:190018434-190023429	Cysteine proteinase 2	5.52778	12.0521	1.12451	2.21499	0.00055	0.00257305
Zm00001d025773	10:129108409-129115766	S-adenosylmethionine decarboxylase proenzyme	47.2753	103.116	1.12511	3.48257	5e-05	0.00031057
Zm00001d028538	1:38586288-38599861	Retrovirus-related Pol polyprotein from transposon TNT 1-94	4.46584	9.74451	1.12566	3.14551	5e-05	0.00031057
Zm00001d052020	4:176653253-176654594	Alpha-1,6-mannosyl-glycoprotein 2-beta-N-acetylglucosaminyltransferase	3.46762	7.57237	1.1268	1.9041	0.0026	0.00948567
Zm00001d029380	1:68392422-68396629	Serine/arginine-rich splicing factor SC35	10.6831	23.3294	1.12681	2.56288	5e-05	0.00031057
Zm00001d031701	1:198847486-198849568	60S ribosomal protein L38	11.0184	24.0656	1.12705	2.08767	0.00035	0.00174885
Zm00001d005094	2:158026679-158029187	Monothiol glutaredoxin-S12, chloroplastic	5.17264	11.2991	1.12724	2.12904	0.0006	0.00276399
Zm00001d031640	1:197105592-197111394	60S ribosomal protein L7a-2	32.8573	71.7882	1.12753	3.39322	5e-05	0.00031057
Zm00001d049351	4:27710139-27712814	3-hydroxyacyl-[acyl-carrier-protein] dehydratase FabZ	26.0265	56.8794	1.12792	3.0748	5e-05	0.00031057
Zm00001d036630	6:95643470-95646716	ATP-dependent zinc metalloprotease FTSH 2, chloroplastic	1.98713	4.34302	1.12801	2.02296	0.00155	0.00614505
Zm00001d042241	3:157297396-157302096	Thiamine pyrophosphokinase 1	3.59067	7.84878	1.12822	1.96061	0.00095	0.00406591
Zm00001d000168	B73V4_ctg50:189023-191498	0	3.40684	7.44748	1.12832	2.16806	0.0005	0.00237556
Zm00001d013810	5:21182816-21186548	Protein DETOXIFICATION 40	33.9128	74.1458	1.12854	3.29355	5e-05	0.00031057
Zm00001d003848	2:62255455-62263760	#N/A	2.47485	5.41104	1.12857	1.92836	0.0008	0.00353513
Zm00001d024466	10:72129359-72135148	Cullin-3A	3.64383	7.96804	1.12877	2.88132	5e-05	0.00031057
Zm00001d047240	9:123671749-123675886	Protein WEAK CHLOROPLAST MOVEMENT UNDER BLUE LIGHT 1	1.34512	2.94148	1.12881	2.28417	0.00025	0.00130155
Zm00001d023779	10:19912190-19918231	3-hydroxyisobutyryl-CoA hydrolase 1	2.27062	4.96603	1.129	2.19171	0.0006	0.00276399
Zm00001d033967	1:279841860-279845629	E3 ubiquitin protein ligase DRIP2	2.27701	4.98055	1.12917	2.21777	0.0003	0.0015276
Zm00001d013076	5:4379337-4381854	60S ribosomal protein L4-1	10.5209	23.0159	1.12937	2.54019	5e-05	0.00031057
Zm00001d002933	2:27103955-27117008	DDB1- and CUL4-associated factor homolog 1	7.46447	16.3312	1.12952	2.57846	5e-05	0.00031057
Zm00001d016155	5:147482561-147503560	Putative callose synthase 8	1.76875	3.87025	1.1297	3.03895	5e-05	0.00031057
Zm00001d039400	3:3413510-3425991	CCR4-NOT transcription complex subunit 4	1.85676	4.06301	1.12976	2.57501	5e-05	0.00031057
Zm00001d033275	1:257130223-257135210	Serine/threonine-protein kinase STY8	21.1429	46.2801	1.13022	3.47732	5e-05	0.00031057
Zm00001d045326	9:19060452-19065712	ATP-dependent 6-phosphofructokinase 3	1.58667	3.47381	1.13051	2.13286	0.0006	0.00276399
Zm00001d051664	4:166088730-166091819	.	42.1122	92.2368	1.1311	3.59651	5e-05	0.00031057
Zm00001d044497	3:229714309-229719339	PITH domain-containing protein 1	30.0386	65.7934	1.13112	2.88944	5e-05	0.00031057
Zm00001d030132	1:108199941-108209147	4-coumarate--CoA ligase-like 2	2.27281	4.98074	1.13188	1.8869	0.00175	0.00680906
Zm00001d054066	4:245798563-245800978	.	35.0533	76.8738	1.13294	3.25282	5e-05	0.00031057
Zm00001d032322	1:222263900-222267470	Nucleobase-ascorbate transporter 6	20.9025	45.861	1.13359	3.21057	5e-05	0.00031057
Zm00001d048169	9:151290747-151291866	UPF0496 protein 1	8.90586	19.5415	1.13371	2.08428	0.0007	0.00315458
Zm00001d004458	2:113246758-113251908	Putative Peroxidase 48	1.42525	3.12907	1.13452	2.5927	0.0001	0.00057936
Zm00001d009163	8:40371056-40374042	Dihydrolipoyl dehydrogenase 1, mitochondrial	45.6226	100.216	1.13529	3.6678	5e-05	0.00031057
Zm00001d018500	5:221871849-221876358	ABC transporter G family member 28	1.40689	3.09148	1.13578	1.92557	0.00095	0.00406591
Zm00001d029627	1:80555016-80559987	#N/A	4.86198	10.6868	1.13621	2.12355	0.0004	0.00196604
Zm00001d034511	1:295100524-295105366	Hydroxyproline O-galactosyltransferase GALT6	1.42384	3.13127	1.13697	2.11226	0.00075	0.00334812
Zm00001d014948	5:69540318-69544592	Protein prenyltransferase alpha subunit repeat-containing protein 1	1.80079	3.96301	1.13797	2.13339	0.00055	0.00257305
Zm00001d037784	6:137680489-137684176	Trifunctional UDP-glucose 4,6-dehydratase/UDP-4-keto-6-deoxy-D-glucose 3,5-epimerase/UDP-4-keto-L-rhamnose-reductase RHM1	1.4344	3.15673	1.13799	2.12122	0.00055	0.00257305
Zm00001d047392	9:128614107-128628845	E3 ubiquitin-protein ligase RFWD3	3.11498	6.85525	1.13799	2.58662	5e-05	0.00031057
Zm00001d019472	7:35446293-35461015	Synaptotagmin-5	15.8299	34.842	1.13817	3.59719	5e-05	0.00031057
Zm00001d049873	4:49840790-49846180	Ubiquitin thioesterase otubain-like	19.0922	42.0293	1.13841	3.29687	5e-05	0.00031057
Zm00001d002980	2:28748574-28751422	Protein RETICULATA-RELATED 1, chloroplastic	8.03472	17.7039	1.13975	2.75942	5e-05	0.00031057
Zm00001d042333	3:161628408-161632125	Probable arabinosyltransferase ARAD1	2.79282	6.15389	1.13978	2.24782	0.00045	0.00217427
Zm00001d017906	5:209944101-209948357	Uncharacterized protein At1g04910	2.29194	5.0575	1.14185	2.42244	0.0003	0.0015276
Zm00001d049049	4:13884939-13892828	Pyruvate kinase 1, cytosolic	9.71378	21.4518	1.14299	3.32396	5e-05	0.00031057
Zm00001d029719	1:84025754-84035792	C-terminal binding protein AN	4.20983	9.30104	1.14363	2.8848	5e-05	0.00031057
Zm00001d041871	3:141630744-141635343	Calcium-dependent protein kinase 24	4.27726	9.4528	1.14405	2.11036	0.0008	0.00353513
Zm00001d034319	1:289129915-289132811	Dihydroceramide fatty acyl 2-hydroxylase FAH1	35.5304	78.5576	1.1447	3.23466	5e-05	0.00031057
Zm00001d025651	10:125013168-125020527	Poly(A)-specific ribonuclease PARN	4.12013	9.11604	1.14572	3.0958	5e-05	0.00031057
Zm00001d009858	8:85446293-85449522	Trans-cinnamate 4-monooxygenase	28.1734	62.3826	1.14681	3.21963	5e-05	0.00031057
Zm00001d038583	6:160510690-160523981	Structural maintenance of chromosomes protein 4	3.85646	8.53974	1.14692	3.74814	5e-05	0.00031057
Zm00001d028955	1:52850181-52853358	Membrane steroid-binding protein 2	24.7764	54.873	1.14713	2.92075	5e-05	0.00031057
Zm00001d033680	1:270918084-270919977	DELLA protein DWARF8	10.5039	23.2663	1.14731	2.46387	0.0001	0.00057936
Zm00001d022028	7:168269021-168278683	DNA mismatch repair protein MSH2	3.2769	7.26027	1.14769	2.99942	5e-05	0.00031057
Zm00001d047533	9:134025004-134027671	Receptor-like protein kinase FERONIA	14.2034	31.4702	1.14775	3.4303	5e-05	0.00031057
Zm00001d052885	4:203405705-203407600	40S ribosomal protein S15a-1	258.48	572.756	1.14787	3.52326	5e-05	0.00031057
Zm00001d038375	6:155834275-155842881	Cysteine--tRNA ligase, chloroplastic/mitochondrial	5.00725	11.0984	1.14826	3.14412	5e-05	0.00031057
Zm00001d046450	9:90491828-90495556	Probable protein phosphatase 2C 57	2.41934	5.36246	1.14828	2.16831	0.00095	0.00406591
Zm00001d020409	7:112014244-112017209	Protein TIFY 6b	15.8129	35.0607	1.14876	3.15582	5e-05	0.00031057
Zm00001d018187	5:216017753-216022412	Mitochondrial phosphate carrier protein 3, mitochondrial	33.0865	73.3665	1.14888	3.50866	5e-05	0.00031057
Zm00001d009702	8:76423473-76428876	Uncharacterized AAA domain-containing protein C24B10.10c	54.3577	120.562	1.14922	3.34849	5e-05	0.00031057
Zm00001d037934	6:142590234-142594536	UDP-glucuronic acid decarboxylase 4	14.0136	31.0839	1.14934	2.88434	5e-05	0.00031057
Zm00001d048564	9:158839267-158844061	Glycogen synthase kinase-3 homolog MsK-3	6.24293	13.8512	1.14972	2.81862	5e-05	0.00031057
Zm00001d039883	3:17590734-17593442	Uncharacterized protein At2g39795, mitochondrial	30.0237	66.6208	1.14987	2.87041	5e-05	0.00031057
Zm00001d036018	6:66392948-66397775	V-type proton ATPase subunit e1	152.922	339.767	1.15175	3.36539	5e-05	0.00031057
Zm00001d042128	3:152235247-152244672	Crossover junction endonuclease MUS81	3.78533	8.41354	1.15229	2.27545	0.00035	0.00174885
Zm00001d011474	8:151593899-151596896	GTP-binding nuclear protein Ran-2	33.4402	74.3322	1.1524	3.38738	5e-05	0.00031057
Zm00001d044533	3:231100303-231105284	Vacuolar cation/proton exchanger 1a	9.84477	21.8863	1.1526	2.65567	5e-05	0.00031057
Zm00001d008229	8:1983065-1984497	Transcription factor DIVARICATA	8.52474	18.9529	1.15269	2.32094	5e-05	0.00031057
Zm00001d012571	8:176802143-176808472	DNA-(apurinic or apyrimidinic site) lyase, chloroplastic	11.7559	26.1438	1.15309	3.29255	5e-05	0.00031057
Zm00001d034588	1:297243181-297244057	Protein CDI	131.36	292.145	1.15316	3.30526	5e-05	0.00031057
Zm00001d019207	7:21927732-21929407	NAC domain-containing protein 67	39.3065	87.4361	1.15346	3.31694	5e-05	0.00031057
Zm00001d043841	3:211598478-211613691	D-glycerate 3-kinase, chloroplastic	6.39747	14.2342	1.15379	1.84597	0.0016	0.00631515
Zm00001d000169	B73V4_ctg50:207557-215785	0	11.5357	25.669	1.15392	3.46305	5e-05	0.00031057
Zm00001d010578	8:120764518-120776089	Probable serine/threonine-protein kinase dyrk2	2.45588	5.46521	1.15404	2.09671	0.0009	0.00389168
Zm00001d011149	8:140722354-140727923	DEAD-box ATP-dependent RNA helicase 15	5.06511	11.2722	1.1541	2.01088	0.0004	0.00196604
Zm00001d003982	2:73519829-73521307	#N/A	6.87215	15.2941	1.15414	2.13718	0.0012	0.00494945
Zm00001d003925	2:68587600-68592566	Serine/threonine-protein kinase PBS1	13.3469	29.7081	1.15435	3.22125	5e-05	0.00031057
Zm00001d047017	9:115421893-115424005	Transcription factor MYC2	14.4062	32.0682	1.15446	2.81585	5e-05	0.00031057
Zm00001d007477	2:232638291-232640352	#N/A	1.17399	2.61342	1.15452	2.16862	0.00095	0.00406591
Zm00001d032427	1:226006095-226012494	Putative E3 ubiquitin-protein ligase RING1a	7.95252	17.7035	1.15455	3.27704	5e-05	0.00031057
Zm00001d002153	2:6864642-6869033	Heterogeneous nuclear ribonucleoprotein U-like protein 1	4.15222	9.24609	1.15496	2.72605	5e-05	0.00031057
Zm00001d025659	10:125277607-125279663	ATP-dependent 6-phosphofructokinase 2	4.55371	10.147	1.15594	2.23577	0.00025	0.00130155
Zm00001d027290	1:1938724-1939294	Lipid transfer protein EARLI 1	22.8521	50.9718	1.15737	2.21896	0.0003	0.0015276
Zm00001d042730	3:178426778-178427336	Histone H3.2	176.167	393.04	1.15774	3.3751	5e-05	0.00031057
Zm00001d038513	6:159016918-159021040	.	5.3528	11.9502	1.15867	3.01039	5e-05	0.00031057
Zm00001d010399	8:112882139-112884372	WRKY transcription factor WRKY24	21.1001	47.1295	1.15938	3.14905	5e-05	0.00031057
Zm00001d045540	9:25852224-25855075	#N/A	12.759	28.5064	1.15977	2.7473	5e-05	0.00031057
Zm00001d021187	7:145306213-145310459	Probable hydroxyacylglutathione hydrolase 2, chloroplastic	21.1886	47.3434	1.15987	3.40177	5e-05	0.00031057
Zm00001d047303	9:126074526-126075345	.	10.2222	22.8485	1.1604	2.32117	0.00025	0.00130155
Zm00001d043516	3:202493783-202501702	LysM domain receptor-like kinase 3	5.24154	11.7208	1.16101	2.94065	5e-05	0.00031057
Zm00001d011245	8:144402590-144406381	Protein arginine methyltransferase NDUFAF7 homolog, mitochondrial	4.23996	9.48137	1.16104	2.61244	5e-05	0.00031057
Zm00001d006922	2:219448056-219452768	Myb-related protein B	4.17988	9.35024	1.16154	3.11173	5e-05	0.00031057
Zm00001d004138	2:85736309-85737686	Heavy metal-associated isoprenylated plant protein 27	3.55188	7.94553	1.16156	2.02961	0.00055	0.00257305
Zm00001d013836	5:21955529-21983392	Serine/threonine-protein kinase fray2	2.25964	5.05505	1.16163	2.70789	0.0001	0.00057936
Zm00001d030014	1:99420957-99424537	Tobamovirus multiplication protein 2A	10.5117	23.5176	1.16175	2.79348	5e-05	0.00031057
Zm00001d051367	4:156084054-156087139	.	2.38668	5.34321	1.1627	2.0362	0.00025	0.00130155
Zm00001d018454	5:221144870-221153975	Glutathione reductase, cytosolic	28.3515	63.4743	1.16275	3.57586	5e-05	0.00031057
Zm00001d017686	5:204298150-204308212	Ubiquitin carboxyl-terminal hydrolase 21	1.27654	2.85804	1.16278	1.90961	0.00085	0.00371002
Zm00001d038676	6:162387695-162391572	Probable xyloglucan glycosyltransferase 7	6.47878	14.5094	1.1632	2.85681	5e-05	0.00031057
Zm00001d011918	8:164544655-164552085	Mitochondrial thiamine pyrophosphate carrier	1.88375	4.22008	1.16366	2.3067	0.0005	0.00237556
Zm00001d046591	9:97600587-97605812	Pyrophosphate-energized vacuolar membrane proton pump	3.76976	8.45629	1.16555	2.80123	5e-05	0.00031057
Zm00001d026050	10:137005719-137007591	#N/A	14.6724	32.9205	1.16588	2.8153	5e-05	0.00031057
Zm00001d030346	1:124047278-124048368	23.6 kDa heat shock protein, mitochondrial	12.3523	27.7447	1.16743	2.42504	0.0001	0.00057936
Zm00001d048149	9:150906092-150911289	Mitochondrial outer membrane protein porin 5	20.0802	45.1214	1.16804	3.38234	5e-05	0.00031057
Zm00001d032859	1:240510200-240515727	Cell division control protein 48 homolog A	30.4491	68.4533	1.16872	3.01312	5e-05	0.00031057
Zm00001d027900	1:17147072-17148511	Protein TIFY 11c	9.31119	20.9421	1.16937	2.39929	0.0001	0.00057936
Zm00001d034166	1:285629980-285647284	Serine/threonine-protein kinase Aurora-3	11.7904	26.5187	1.1694	2.81868	5e-05	0.00031057
Zm00001d031064	1:175371169-175379288	Auxin response factor 25	2.50331	5.63509	1.1706	2.80041	5e-05	0.00031057
Zm00001d028210	1:26517878-26521293	Replication protein A 70 kDa DNA-binding subunit B	4.10042	9.23067	1.17066	2.83402	5e-05	0.00031057
Zm00001d042487	3:169304329-169311985	Sn1-specific diacylglycerol lipase beta	4.25715	9.58366	1.17069	3.09586	5e-05	0.00031057
Zm00001d010409	8:113368256-113369757	Peroxidase 29	4.35654	9.81625	1.17199	1.84823	0.00265	0.0096319
Zm00001d037619	6:132054551-132056781	Acyl transferase 7	30.8936	69.614	1.17207	2.7587	5e-05	0.00031057
Zm00001d049372	4:28134926-28144752	GTP-binding protein ERG	7.95077	17.9179	1.17224	2.91298	5e-05	0.00031057
Zm00001d027348	1:3441885-3443394	#N/A	5.29579	11.9386	1.17271	2.01078	0.00095	0.00406591
Zm00001d047797	9:142003890-142008103	UDP-glucuronic acid decarboxylase 6	25.5124	57.5298	1.17311	3.48255	5e-05	0.00031057
Zm00001d035764	6:46340882-46353764	E3 ubiquitin-protein ligase ORTHRUS 2	12.3366	27.8195	1.17315	2.39623	0.00055	0.00257305
Zm00001d008266	8:3527557-3529941	Peroxidase 24	34.9856	78.8945	1.17316	3.12162	5e-05	0.00031057
Zm00001d023432	10:5430130-5433276	#N/A	2.99999	6.76632	1.17342	2.07044	0.00095	0.00406591
Zm00001d017470	5:196852394-196857257	Putative lipase ROG1	3.2663	7.36878	1.17377	2.58941	0.00015	0.000830091
Zm00001d026191	10:140619550-140620363	Ethylene-responsive transcription factor 2	16.7084	37.702	1.17407	2.29635	0.0002	0.00106912
Zm00001d013445	5:11750200-11752331	#N/A	9.1767	20.7075	1.17411	2.29669	5e-05	0.00031057
Zm00001d006821	2:217263982-217264651	Mitochondrial import inner membrane translocase subunit TIM17-1	34.5944	78.0714	1.17426	2.59089	5e-05	0.00031057
Zm00001d032172	1:215551745-215556493	ATP-dependent 6-phosphofructokinase 5, chloroplastic	4.61608	10.4186	1.17442	2.86294	5e-05	0.00031057
Zm00001d003345	2:41017792-41019879	Small nuclear ribonucleoprotein Sm D1	6.55307	14.7958	1.17495	2.19227	0.00015	0.000830091
Zm00001d028160	1:24589852-24593712	CASP-like protein 2U2	26.4687	59.7708	1.17515	2.75759	5e-05	0.00031057
Zm00001d025353	10:115197315-115205461	Protein transport protein Sec24A	5.16663	11.6796	1.17669	3.29787	5e-05	0.00031057
Zm00001d047255	9:124477956-124483883	3-oxoacyl-[acyl-carrier-protein] synthase II, chloroplastic	10.3386	23.4004	1.17849	3.49325	5e-05	0.00031057
Zm00001d005920	2:192761280-192766625	Beta carbonic anhydrase 5, chloroplastic	2.22485	5.03623	1.17864	2.22894	0.00025	0.00130155
Zm00001d008940	8:26144395-26151066	ABC transporter D family member 2, chloroplastic	1.9515	4.41756	1.17866	2.53864	5e-05	0.00031057
Zm00001d036409	6:87176108-87177459	.	5.15172	11.6623	1.17872	2.06068	0.0014	0.00563084
Zm00001d030045	1:101898450-101899089	Abscisic acid receptor PYR1	48.2947	109.347	1.17897	2.80219	5e-05	0.00031057
Zm00001d028998	1:54251797-54253443	.	41.275	93.4609	1.17909	3.44297	5e-05	0.00031057
Zm00001d052021	4:176740634-176748686	DNA replication licensing factor MCM5	1.64443	3.72534	1.17978	2.36966	0.0001	0.00057936
Zm00001d021520	7:154995448-154999093	RanBP2-type zinc finger protein At1g67325	17.9639	40.6999	1.17992	3.11576	5e-05	0.00031057
Zm00001d011889	8:164038136-164044860	Hexokinase-3	27.7477	62.8736	1.18008	3.75703	5e-05	0.00031057
Zm00001d003840	2:61892173-61893274	#N/A	12.9815	29.4544	1.18202	2.26512	0.0003	0.0015276
Zm00001d045468	9:23320698-23323957	Probable lysophospholipase BODYGUARD 3	7.51124	17.0442	1.18215	2.37466	5e-05	0.00031057
Zm00001d016493	5:164627845-164631311	dCTP pyrophosphatase 1	5.61535	12.7429	1.18225	2.1497	0.00035	0.00174885
Zm00001d020219	7:100656059-100660194	Mitochondrial outer membrane protein porin of 36 kDa	33.9698	77.0918	1.18233	3.6229	5e-05	0.00031057
Zm00001d029149	1:60531178-60535397	Zinc finger protein CONSTANS-LIKE 13	15.1268	34.3424	1.18288	3.3398	5e-05	0.00031057
Zm00001d030256	1:117002473-117006192	Caffeoylshikimate esterase	7.39578	16.7911	1.18292	2.83715	5e-05	0.00031057
Zm00001d027502	1:6825833-6829116	Probable adenylate kinase 1, chloroplastic	10.9981	24.9808	1.18357	2.9717	5e-05	0.00031057
Zm00001d014030	5:29404682-29410087	Malate dehydrogenase, cytoplasmic	15.7211	35.7099	1.18362	3.16286	5e-05	0.00031057
Zm00001d023710	10:16559947-16565966	Small RNA degrading nuclease 5	1.37283	3.11967	1.18424	2.4069	0.0002	0.00106912
Zm00001d049688	4:40291182-40292526	.	21.7991	49.5468	1.18452	2.66928	5e-05	0.00031057
Zm00001d048766	4:5217091-5228295	1-acyl-sn-glycerol-3-phosphate acyltransferase PLS1	17.2319	39.1917	1.18546	3.36723	5e-05	0.00031057
Zm00001d013097	5:4688273-4690690	Glucan endo-1,3-beta-glucosidase 8	10.1979	23.2087	1.1864	2.87149	5e-05	0.00031057
Zm00001d038840	6:165624431-165627829	Mitochondrial outer membrane protein porin 2	37.6759	85.7649	1.18674	3.63418	5e-05	0.00031057
Zm00001d020692	7:128747472-128750503	Beta-1,3-galactosyltransferase 7	3.89412	8.87577	1.18857	2.40158	0.0003	0.0015276
Zm00001d025419	10:118105918-118109881	#N/A	3.09584	7.05983	1.1893	3.12917	5e-05	0.00031057
Zm00001d023801	10:22188802-22205430	DNA polymerase alpha subunit B	1.88106	4.29223	1.19018	2.54944	5e-05	0.00031057
Zm00001d027963	1:18460170-18462291	Uncharacterized mitochondrial protein ymf11	1.34881	3.07973	1.19112	1.96952	0.00205	0.0077849
Zm00001d042600	3:173133841-173138661	Cytochrome c	4.74582	10.8443	1.1922	1.99778	0.00155	0.00614505
Zm00001d043515	3:202396754-202399107	Auxin-responsive protein IAA6	5.80779	13.2725	1.19238	2.54767	5e-05	0.00031057
Zm00001d010755	8:126969527-126978127	Alpha,alpha-trehalose-phosphate synthase [UDP-forming] 1	11.2257	25.672	1.19338	3.55284	5e-05	0.00031057
Zm00001d031647	1:197308954-197311791	Bidirectional sugar transporter SWEET11	8.01395	18.3311	1.19371	2.05742	0.00225	0.00841279
Zm00001d020791	7:132829318-132830404	E3 ubiquitin-protein ligase Os04g0590900	5.40327	12.3623	1.19404	1.9489	0.00195	0.00746888
Zm00001d017845	5:208603373-208605036	.	6.45199	14.7637	1.19424	2.15962	0.0003	0.0015276
Zm00001d014366	5:43072230-43076160	L-ascorbate oxidase homolog	3.95013	9.04061	1.19452	2.44566	0.0001	0.00057936
Zm00001d041480	3:122677054-122681572	DEAD-box ATP-dependent RNA helicase 9	4.79725	10.9802	1.19462	2.95718	5e-05	0.00031057
Zm00001d039406	3:3607951-3612391	Protein MALE DISCOVERER 1	1.57536	3.61001	1.19632	2.35964	0.00015	0.000830091
Zm00001d010495	8:118000010-118007378	Vesicle-associated protein 2-2	3.36321	7.72651	1.19998	2.74393	5e-05	0.00031057
Zm00001d004023	2:76316302-76331103	Usher syndrome type-1G protein	3.46818	7.96906	1.20023	2.15933	0.0003	0.0015276
Zm00001d032694	1:234842942-234845229	Myb-related protein Myb4	5.16648	11.8796	1.20124	1.97188	0.00145	0.00579593
Zm00001d029030	1:55369897-55371351	.	24.7885	56.9984	1.20125	2.92092	5e-05	0.00031057
Zm00001d028406	1:33752853-33754497	3-ketoacyl-CoA synthase 1	7.10317	16.3521	1.20294	2.35007	5e-05	0.00031057
Zm00001d023797	10:21896215-21908831	.	4.27541	9.84415	1.2032	3.61124	5e-05	0.00031057
Zm00001d022069	7:169295746-169298138	Ninja-family protein 5	5.25919	12.1156	1.20396	2.17357	0.0003	0.0015276
Zm00001d028787	1:46389552-46393554	Malonyl-CoA-acyl carrier protein transacylase, mitochondrial	25.2244	58.1591	1.20518	3.60279	5e-05	0.00031057
Zm00001d029366	1:67604992-67609141	Uncharacterized WD repeat-containing protein C2A9.03	2.94874	6.79932	1.20529	1.96431	0.0013	0.0052904
Zm00001d048497	9:157237557-157241000	#N/A	11.5552	26.6619	1.20624	3.01576	5e-05	0.00031057
Zm00001d006726	2:215373039-215374709	U-box domain-containing protein 4	5.95697	13.7472	1.20649	2.03116	0.00135	0.00545852
Zm00001d010625	8:122237998-122247973	.	3.56427	8.23253	1.20773	2.86069	5e-05	0.00031057
Zm00001d043864	3:212467686-212472046	Aspartyl protease AED3	14.2542	32.9245	1.20777	2.7765	5e-05	0.00031057
Zm00001d003108	2:32464009-32470101	Adenine phosphoribosyltransferase 1, chloroplastic	8.24502	19.0475	1.208	2.58539	0.0001	0.00057936
Zm00001d053425	4:230958228-230961825	GDSL esterase/lipase At5g45910	44.3986	102.624	1.20879	3.68753	5e-05	0.00031057
Zm00001d031120	1:178020479-178025593	Cationic amino acid transporter 2, vacuolar	18.9042	43.7068	1.20915	3.74549	5e-05	0.00031057
Zm00001d012074	8:167679456-167682478	Protein trichome birefringence-like 18	4.22596	9.77202	1.20938	2.97525	5e-05	0.00031057
Zm00001d053580	4:235225982-235235156	Dihydrolipoyllysine-residue acetyltransferase component 3 of pyruvate dehydrogenase complex, mitochondrial	19.852	45.9072	1.20944	3.90112	5e-05	0.00031057
Zm00001d006328	2:204816151-204820265	Transmembrane 9 superfamily member 10	3.6262	8.38614	1.20955	2.83562	5e-05	0.00031057
Zm00001d014961	5:70342380-70345801	Protein KINESIN LIGHT CHAIN-RELATED 3	7.34866	16.9991	1.2099	2.8957	5e-05	0.00031057
Zm00001d017979	5:211184325-211211518	Dynamin-2B	3.24834	7.51666	1.21039	3.24167	5e-05	0.00031057
Zm00001d041671	3:132868466-132868983	.	17.6554	40.8546	1.21039	1.77649	0.0024	0.00888499
Zm00001d053748	4:240407320-240410509	#N/A	6.41821	14.8583	1.21102	1.83246	0.0021	0.00793527
Zm00001d015186	5:78725618-78727794	.	88.3998	204.762	1.21184	3.79775	5e-05	0.00031057
Zm00001d012750	8:179683028-179693484	MACPF domain-containing protein CAD1	4.74655	11.0001	1.21257	3.02519	5e-05	0.00031057
Zm00001d016844	5:178232994-178234870	FAD-dependent monooxygenase paxM	4.31462	10	1.2127	2.03299	0.00095	0.00406591
Zm00001d016347	5:158593845-158598525	Calmodulin	5.05484	11.7193	1.21315	2.73237	5e-05	0.00031057
Zm00001d020544	7:121750711-121753167	S-adenosylmethionine decarboxylase proenzyme	1.83542	4.25658	1.21359	1.85626	0.0016	0.00631515
Zm00001d047482	9:131693046-131697968	#N/A	5.8871	13.6537	1.21366	2.99831	5e-05	0.00031057
Zm00001d043674	3:206991600-206992551	Cytidine deaminase 1	15.3301	35.5736	1.21443	2.3802	0.00035	0.00174885
Zm00001d006001	2:195047187-195051225	Probable WRKY transcription factor 2	2.66123	6.17616	1.21462	2.712	5e-05	0.00031057
Zm00001d019467	7:35257908-35262008	Spermidine synthase 1	17.1029	39.6935	1.21466	3.29693	5e-05	0.00031057
Zm00001d039052	6:169320792-169327039	Sugar transporter ERD6-like 6	1.62051	3.76202	1.21506	2.01921	0.0024	0.00888499
Zm00001d034875	1:304506319-304508029	Non-specific phospholipase C4	24.635	57.2373	1.21625	3.09853	5e-05	0.00031057
Zm00001d011610	8:155807922-155820009	Glutamate synthase 1 [NADH], chloroplastic	21.8363	50.7481	1.21662	3.64739	5e-05	0.00031057
Zm00001d040446	3:43701924-43707461	Pyruvate kinase, cytosolic isozyme	44.8339	104.245	1.21732	3.87147	5e-05	0.00031057
Zm00001d040331	3:38375079-38380515	Protein SAD1/UNC-84 domain protein 2	15.3578	35.7231	1.21789	3.29099	5e-05	0.00031057
Zm00001d013885	5:23769402-23776625	Probable plastid-lipid-associated protein 10, chloroplastic	2.87183	6.68718	1.21943	2.12073	0.0004	0.00196604
Zm00001d040090	3:27133418-27141104	Homeobox-leucine zipper protein ROC5	6.01241	14.0158	1.22104	2.8104	5e-05	0.00031057
Zm00001d008529	8:11903898-11907881	Endonuclease 4	3.67593	8.57703	1.22237	2.09152	0.00045	0.00217427
Zm00001d022451	7:177999484-178000798	CBL-interacting protein kinase 29	3.89368	9.09089	1.22329	1.95742	0.00245	0.00903408
Zm00001d046194	9:71335284-71350665	Probable phospholipid-transporting ATPase 4	6.96018	16.2526	1.22347	3.79699	5e-05	0.00031057
Zm00001d005030	2:154831003-154835182	40S ribosomal protein S4	9.23151	21.5575	1.22355	2.51981	5e-05	0.00031057
Zm00001d039596	3:8649712-8661900	DNA mismatch repair protein MSH7	2.07636	4.84944	1.22376	3.22364	5e-05	0.00031057
Zm00001d046388	9:86625252-86638592	Probable histone deacetylase 19	8.96584	20.945	1.22409	3.08207	5e-05	0.00031057
Zm00001d043301	3:195079340-195089695	Dymeclin	22.0279	51.47	1.2244	3.93888	5e-05	0.00031057
Zm00001d020257	7:102493333-102494600	Heavy metal-associated isoprenylated plant protein 23	34.5804	80.8562	1.22541	3.00993	5e-05	0.00031057
Zm00001d018298	5:218096888-218097874	18.6 kDa class III heat shock protein	8.79009	20.5611	1.22597	2.08447	0.0002	0.00106912
Zm00001d053998	4:244830011-244833977	Wee1-like protein kinase	1.29395	3.02684	1.22603	2.0821	0.0013	0.0052904
Zm00001d008282	8:3986428-3989894	Cell number regulator 5	2.18834	5.11976	1.22624	1.9541	0.0012	0.00494945
Zm00001d030725	1:155959517-155963384	Probable mediator of RNA polymerase II transcription subunit 37e	258.8	605.693	1.22675	3.27603	5e-05	0.00031057
Zm00001d010816	8:128720706-128725365	.	2.34867	5.49925	1.22739	2.51635	0.0002	0.00106912
Zm00001d026311	10:143365794-143369286	Probable UDP-arabinose 4-epimerase 2	17.72	41.4937	1.22752	3.71333	5e-05	0.00031057
Zm00001d049553	4:34694523-34700206	Vesicle-associated protein 1-1	9.22856	21.636	1.22926	2.8916	5e-05	0.00031057
Zm00001d003725	2:56544751-56545162	Histone H3.2	28.8245	67.6339	1.23045	1.9107	0.00165	0.00648017
Zm00001d034602	1:297605176-297611407	Methylenetetrahydrofolate reductase 1	20.6066	48.3917	1.23165	3.85097	5e-05	0.00031057
Zm00001d046539	9:94817070-94823847	26S protease regulatory subunit 10B homolog A	10.9406	25.714	1.23285	3.44518	5e-05	0.00031057
Zm00001d027887	1:16744339-16746866	.	6.88697	16.2004	1.23409	2.22846	0.00055	0.00257305
Zm00001d026511	10:147370577-147387613	MAP3K epsilon protein kinase 1	6.52073	15.3474	1.23489	2.1149	0.0002	0.00106912
Zm00001d004339	2:104567259-104574379	Pumilio homolog 3	1.42814	3.36234	1.23532	2.58467	0.0001	0.00057936
Zm00001d054104	4:246521632-246556919	E3 ubiquitin-protein ligase UPL3	1.51091	3.55753	1.23546	2.6773	5e-05	0.00031057
Zm00001d026584	10:148384226-148387093	Probable adenylate kinase 6, chloroplastic	31.7379	74.7697	1.23625	3.72547	5e-05	0.00031057
Zm00001d018183	5:215965774-215970551	Mitochondrial phosphate carrier protein 3, mitochondrial	21.909	51.6202	1.23641	3.67202	5e-05	0.00031057
Zm00001d037492	6:127210248-127215264	Pyrophosphate-energized vacuolar membrane proton pump	9.41693	22.2157	1.23825	3.28577	5e-05	0.00031057
Zm00001d033421	1:262588024-262589296	Deoxyuridine 5'-triphosphate nucleotidohydrolase	5.37869	12.6955	1.23899	1.91671	0.0012	0.00494945
Zm00001d033993	1:280585850-280605270	ATP-dependent RNA helicase SUV3, mitochondrial	3.14252	7.41778	1.23906	2.42662	0.00025	0.00130155
Zm00001d046344	9:81994756-82001394	Ent-kaurene oxidase 2	3.72177	8.7853	1.2391	2.58553	5e-05	0.00031057
Zm00001d053108	4:214198922-214199570	#N/A	43.4606	102.628	1.23965	2.64266	5e-05	0.00031057
Zm00001d052047	4:177540275-177544151	#N/A	1.86698	4.40936	1.23986	2.16635	0.0002	0.00106912
Zm00001d038562	6:159894086-159895160	Probable sugar phosphate/phosphate translocator At2g25520	64.9195	153.347	1.24008	3.47407	5e-05	0.00031057
Zm00001d024540	10:77144190-77149860	Stomatin-like protein 2, mitochondrial	20.2237	47.7831	1.24045	3.74715	5e-05	0.00031057
Zm00001d046471	9:91463413-91463893	Multiprotein-bridging factor 1c	76.685	181.44	1.24247	2.94952	5e-05	0.00031057
Zm00001d013542	5:13953890-13960814	Protein argonaute 11	7.79666	18.4495	1.24265	2.6932	5e-05	0.00031057
Zm00001d021641	7:158886138-158893885	Microtubule-associated protein TORTIFOLIA1	3.22346	7.62812	1.24272	3.22146	5e-05	0.00031057
Zm00001d002103	2:5981830-5989287	3-oxoacyl-[acyl-carrier-protein] synthase III, chloroplastic	2.87642	6.80741	1.24283	2.16156	0.00055	0.00257305
Zm00001d033574	1:267434893-267435724	#N/A	21.5664	51.0467	1.24304	2.61403	0.0002	0.00106912
Zm00001d022111	7:170578901-170582501	40S ribosomal protein S3-3	4.55566	10.7837	1.24311	1.76007	0.00055	0.00257305
Zm00001d008517	8:11273751-11279847	Actin-interacting protein 1-2	12.7789	30.263	1.24379	3.76434	5e-05	0.00031057
Zm00001d018428	5:220579160-220583564	Uncharacterized protein sll0103	5.05068	11.9616	1.24387	2.90975	5e-05	0.00031057
Zm00001d037803	6:138208457-138215829	Lysine-specific demethylase JMJ18	1.50869	3.5759	1.24501	3.07442	5e-05	0.00031057
Zm00001d015180	5:78500833-78504838	Proteasome subunit alpha type-1	125.365	297.269	1.24564	3.85926	5e-05	0.00031057
Zm00001d004564	2:118175341-118183006	Putative aconitate hydratase, cytoplasmic	6.15442	14.6016	1.24643	3.24963	5e-05	0.00031057
Zm00001d017905	5:209876442-209879538	.	9.05062	21.473	1.24644	3.14228	5e-05	0.00031057
Zm00001d015301	5:83434420-83436673	60S ribosomal protein L37a-2	5.92929	14.0683	1.24652	2.13904	0.0006	0.00276399
Zm00001d003197	2:35313290-35313959	Probable calcium-binding protein CML22	7.26215	17.2315	1.24658	1.87396	0.00205	0.0077849
Zm00001d037059	6:110970399-110982871	Alpha-glucan water dikinase, chloroplastic	1.25751	2.98532	1.24732	2.50675	5e-05	0.00031057
Zm00001d012509	8:175618868-175624876	Clathrin heavy chain 1	7.813	18.5522	1.24764	1.76037	0.0025	0.00918832
Zm00001d033556	1:267103209-267108765	Polygalacturonate 4-alpha-galacturonosyltransferase	15.4645	36.7477	1.24869	3.96135	5e-05	0.00031057
Zm00001d032267	1:219821586-219829798	Hydroxyproline O-galactosyltransferase HPGT1	2.45399	5.83379	1.2493	2.37128	0.0001	0.00057936
Zm00001d011051	8:137414911-137418125	ACT domain-containing protein ACR9	54.5968	129.846	1.24991	3.80638	5e-05	0.00031057
Zm00001d001825	2:1530584-1535057	WD repeat-containing protein 44	4.49206	10.6918	1.25106	3.17253	5e-05	0.00031057
Zm00001d047110	9:118915806-118919998	Probable trehalose-phosphate phosphatase 2	10.2928	24.5066	1.25153	3.63226	5e-05	0.00031057
Zm00001d045480	9:23973731-23986870	.	3.293	7.84758	1.25285	2.43009	0.00015	0.000830091
Zm00001d045013	9:10193692-10195834	Pollen receptor-like kinase 3	3.23769	7.71602	1.25289	2.15336	0.0007	0.00315458
Zm00001d010009	8:94987330-94992881	60S ribosomal protein L17	44.0823	105.122	1.2538	3.61374	5e-05	0.00031057
Zm00001d019149	7:19277317-19283676	Probable cellulose synthase A catalytic subunit 8 [UDP-forming]	7.83826	18.7045	1.25478	3.71924	5e-05	0.00031057
Zm00001d017481	5:197261309-197263939	#N/A	1.17688	2.80931	1.25524	2.21864	0.00055	0.00257305
Zm00001d023796	10:21488310-21534611	Helicase and polymerase-containing protein TEBICHI	2.84907	6.80118	1.25529	2.86965	5e-05	0.00031057
Zm00001d042152	3:153901322-153906929	Probable glycerol-3-phosphate dehydrogenase [NAD(+)] 1, cytosolic	9.51851	22.7582	1.25758	3.31312	5e-05	0.00031057
Zm00001d028303	1:29785410-29788053	Branched-chain-amino-acid aminotransferase 3, chloroplastic	4.19989	10.0515	1.25899	2.15447	0.00055	0.00257305
Zm00001d036416	6:87481067-87487593	CDPK-related kinase 3	3.23674	7.75092	1.25983	2.81338	5e-05	0.00031057
Zm00001d010961	8:135100379-135102824	Putative serine/threonine-protein kinase-like protein CCR3	2.30294	5.51487	1.25985	1.94112	0.00205	0.0077849
Zm00001d007901	2:242052644-242054040	.	16.7766	40.18	1.26002	3.73589	5e-05	0.00031057
Zm00001d008827	8:21834899-21838661	Probable choline kinase 2	3.51426	8.4175	1.26017	2.39207	0.0002	0.00106912
Zm00001d011192	8:142592860-142598233	Carbamoyl-phosphate synthase large chain, chloroplastic	9.25947	22.1884	1.2608	3.87276	5e-05	0.00031057
Zm00001d012276	8:171739919-171740516	Histone H3.2	174.766	418.799	1.26083	3.78376	5e-05	0.00031057
Zm00001d039568	3:8111484-8115811	Polynucleotide 5'-hydroxyl-kinase NOL9	8.49605	20.3669	1.26136	3.3333	5e-05	0.00031057
Zm00001d043723	3:208306503-208307754	F-box/kelch-repeat protein At1g23390	5.57319	13.3651	1.26189	2.05797	0.00135	0.00545852
Zm00001d013210	5:6604878-6605949	#N/A	31.3112	75.181	1.26369	3.20565	5e-05	0.00031057
Zm00001d031667	1:198119171-198130785	ADP-ribosylation factor GTPase-activating protein AGD3	2.98815	7.17687	1.2641	2.58643	5e-05	0.00031057
Zm00001d011268	8:145143790-145144951	#N/A	18.7016	44.9332	1.26462	2.77496	5e-05	0.00031057
Zm00001d025201	10:108840805-108848622	3-oxoacyl-[acyl-carrier-protein] reductase 1, chloroplastic	25.8299	62.0916	1.26536	2.89234	5e-05	0.00031057
Zm00001d021283	7:147803102-147807697	Subtilisin-like protease SBT3.6	1.21923	2.93281	1.26632	2.32287	0.00015	0.000830091
Zm00001d010309	8:109067494-109086927	Squamosa promoter-binding-like protein 9	7.04038	16.9356	1.26633	3.61725	5e-05	0.00031057
Zm00001d019852	7:69871826-69879275	WD repeat and HMG-box DNA-binding protein 1	1.79367	4.31665	1.267	3.13314	5e-05	0.00031057
Zm00001d029027	1:55241837-55244510	Uncharacterized protein ycf54	8.85763	21.3418	1.26869	2.43564	0.0001	0.00057936
Zm00001d043018	3:186599556-186600219	PRA1 family protein B3	42.7399	103.021	1.26928	2.81783	5e-05	0.00031057
Zm00001d034781	1:302141834-302144393	G-type lectin S-receptor-like serine/threonine-protein kinase At1g34300	2.23533	5.38861	1.26943	1.98281	0.00195	0.00746888
Zm00001d051650	4:165698218-165708165	Altered inheritance of mitochondria protein 32	27.9019	67.2977	1.2702	4.05229	5e-05	0.00031057
Zm00001d014770	5:62508457-62512284	.	8.1583	19.73	1.27405	3.16617	5e-05	0.00031057
Zm00001d049381	4:28445472-28446302	.	17.0745	41.3258	1.2752	2.57393	5e-05	0.00031057
Zm00001d009027	8:30676240-30681712	Protein psi1	5.79329	14.0247	1.27551	2.73088	5e-05	0.00031057
Zm00001d033990	1:280544049-280545649	BI1-like protein	26.2893	63.6676	1.27608	3.14406	5e-05	0.00031057
Zm00001d045043	9:10913772-10917850	Putative cinnamyl alcohol dehydrogenase 4	4.03682	9.77915	1.27649	2.7024	5e-05	0.00031057
Zm00001d004416	2:110383915-110417211	Probable RNA-dependent RNA polymerase 3	1.47183	3.56632	1.27682	2.61557	5e-05	0.00031057
Zm00001d027344	1:3371323-3374866	Molybdate-anion transporter	16.8805	40.9365	1.27803	3.5512	5e-05	0.00031057
Zm00001d050163	4:69979607-69982793	#N/A	1.9805	4.80807	1.27959	2.5936	5e-05	0.00031057
Zm00001d025665	10:125373154-125379315	Amino acid permease 8	27.2338	66.1195	1.27968	3.44512	5e-05	0.00031057
Zm00001d026351	10:144099074-144105329	Homeobox-leucine zipper protein ROC2	6.94921	16.8719	1.2797	3.12209	5e-05	0.00031057
Zm00001d052947	4:205833913-205836511	.	1.57718	3.83019	1.28007	2.80718	5e-05	0.00031057
Zm00001d040084	3:26931528-26935231	Fructose-bisphosphate aldolase 3, chloroplastic	35.2881	85.7163	1.28039	3.94167	5e-05	0.00031057
Zm00001d004561	2:118161396-118171157	Mitochondrial uncoupling protein 1	3.60993	8.76873	1.2804	2.30117	0.0002	0.00106912
Zm00001d017493	5:197521764-197523503	Expansin-B15	319.216	775.417	1.28044	3.86334	5e-05	0.00031057
Zm00001d021508	7:154481840-154484342	60S ribosomal protein L15-1	38.6838	93.9726	1.28051	3.54356	5e-05	0.00031057
Zm00001d037099	6:112114922-112125143	Phosphoinositide phosphatase SAC4	11.6907	28.4063	1.28085	3.91526	5e-05	0.00031057
Zm00001d051478	4:160007879-160008267	Histone H4	192.229	467.261	1.28141	3.01164	5e-05	0.00031057
Zm00001d032467	1:227648294-227649464	Cytochrome P450 84A1	5.59839	13.6116	1.28175	1.89091	0.00225	0.00841279
Zm00001d047726	9:140012035-140016307	DnaJ protein ERDJ3A	4.76874	11.6006	1.28252	3.42622	5e-05	0.00031057
Zm00001d019059	7:14393300-14395002	#N/A	39.0305	95.0293	1.28377	3.48917	5e-05	0.00031057
Zm00001d026649	10:149382211-149384169	Oxalate--CoA ligase	211.577	515.159	1.28383	3.99358	5e-05	0.00031057
Zm00001d033477	1:263847356-263853302	LINE-1 retrotransposable element ORF2 protein	6.37152	15.5261	1.28498	2.46897	5e-05	0.00031057
Zm00001d034032	1:281626477-281630659	Protein STRICTOSIDINE SYNTHASE-LIKE 3	16.08	39.1965	1.28545	3.36385	5e-05	0.00031057
Zm00001d038936	6:167317798-167323586	CDP-diacylglycerol--serine O-phosphatidyltransferase 2	1.49773	3.65294	1.28628	2.16156	0.00085	0.00371002
Zm00001d021900	7:165631366-165634363	#N/A	16.7494	40.8611	1.28662	3.3028	5e-05	0.00031057
Zm00001d009564	8:70518975-70526128	Guanylate-binding protein 2	6.49509	15.855	1.28751	3.93989	5e-05	0.00031057
Zm00001d050917	4:130884293-130889709	Glycerophosphodiester phosphodiesterase GDPDL3	35.2484	86.0917	1.28831	4.09735	5e-05	0.00031057
Zm00001d041606	3:129567272-129572209	DNA replication licensing factor MCM7	4.92845	12.0479	1.28957	2.95703	5e-05	0.00031057
Zm00001d036533	6:91324081-91328565	.	1.88195	4.60142	1.28985	2.67384	5e-05	0.00031057
Zm00001d042717	3:178106746-178109443	Ethylene-responsive transcription factor RAP2-6	14.0414	34.3455	1.29043	2.53708	0.00015	0.000830091
Zm00001d039403	3:3463016-3468930	Dol-P-Man:Man(6)GlcNAc(2)-PP-Dol alpha-1,2-mannosyltransferase	8.49843	20.7971	1.29111	3.49719	5e-05	0.00031057
Zm00001d052144	4:180987904-180989963	#N/A	2.70236	6.61365	1.29123	2.51626	0.00015	0.000830091
Zm00001d048362	9:155112475-155116062	Mitochondrial outer membrane protein porin 6	5.34305	13.0862	1.29231	2.99891	5e-05	0.00031057
Zm00001d017707	5:204745660-204751145	ATPase family AAA domain-containing protein 3	18.8438	46.1536	1.29235	3.6868	5e-05	0.00031057
Zm00001d051591	4:163976516-163976981	Histone H2B.1	55.0012	134.728	1.29252	2.94297	5e-05	0.00031057
Zm00001d028954	1:52836663-52841244	Guanylate kinase 2, chloroplastic/mitochondrial	1.80556	4.42566	1.29344	2.05011	0.0008	0.00353513
Zm00001d038262	6:152608622-152611425	Patellin-5	88.577	217.331	1.29489	4.09219	5e-05	0.00031057
Zm00001d035037	6:2749866-2752983	0	122.42	300.667	1.29633	3.99876	5e-05	0.00031057
Zm00001d033174	1:252797115-252799804	Alpha-1,4-glucan-protein synthase [UDP-forming]	200.001	491.235	1.2964	3.81062	5e-05	0.00031057
Zm00001d031555	1:194120553-194122562	Cytochrome b561 and DOMON domain-containing protein At4g12980	10.1576	24.9526	1.29663	2.81049	5e-05	0.00031057
Zm00001d034423	1:292612408-292617099	Tetratricopeptide repeat protein 1	8.21125	20.172	1.29668	3.54972	5e-05	0.00031057
Zm00001d042663	3:175913575-175915828	5'-3' exonuclease	2.36826	5.82049	1.29731	2.48299	0.0001	0.00057936
Zm00001d050359	4:83491442-83500858	F-box protein SKIP28	3.7195	9.14176	1.29736	2.56722	0.00015	0.000830091
Zm00001d017324	5:192697940-192709743	Replication protein A 32 kDa subunit B	23.8978	58.7365	1.29738	3.73841	5e-05	0.00031057
Zm00001d047477	9:131427573-131429871	Nascent polypeptide-associated complex subunit alpha-like protein	37.1063	91.2219	1.29772	3.78678	5e-05	0.00031057
Zm00001d022258	7:173807743-173812211	Pectin acetylesterase 2	97.6034	239.955	1.29776	3.92047	5e-05	0.00031057
Zm00001d018632	7:1388810-1390530	Probable pyridoxal 5'-phosphate synthase subunit PDX1.1	95.0214	233.848	1.29925	3.99891	5e-05	0.00031057
Zm00001d026291	10:142982966-142990366	DNA (cytosine-5)-methyltransferase 1	4.17632	10.2809	1.29966	3.54271	5e-05	0.00031057
Zm00001d032604	1:231816477-231819909	WAT1-related protein At3g02690, chloroplastic	1.86236	4.58747	1.30057	2.20247	0.0006	0.00276399
Zm00001d025193	10:108468386-108473191	Eukaryotic translation initiation factor 3 subunit H	4.08028	10.0528	1.30086	2.46798	0.0001	0.00057936
Zm00001d008841	8:22307487-22307982	17.8 kDa class II heat shock protein	236.743	583.383	1.30112	3.28676	5e-05	0.00031057
Zm00001d025401	10:117126776-117127673	.	25.0109	61.6321	1.30112	3.08711	5e-05	0.00031057
Zm00001d024940	10:96012098-96019757	.	5.5009	13.5599	1.3016	2.51094	0.0001	0.00057936
Zm00001d050868	4:127596450-127602837	Somatic embryogenesis receptor kinase 1	1.92383	4.74393	1.3021	2.55207	0.0001	0.00057936
Zm00001d019123	7:17937713-17949491	5'-nucleotidase SurE	9.89522	24.4142	1.30291	3.51132	5e-05	0.00031057
Zm00001d051307	4:152668572-152674431	Autophagy-related protein 13a	3.85978	9.52896	1.3038	2.52734	5e-05	0.00031057
Zm00001d046261	9:77150412-77154118	Thaumatin-like protein 1a	16.2278	40.0686	1.304	2.91793	5e-05	0.00031057
Zm00001d041063	3:94045565-94050496	Serine/threonine-protein kinase KIPK1	1.59163	3.93896	1.30731	2.74313	5e-05	0.00031057
Zm00001d048696	4:3440983-3444303	Probable polygalacturonase	3.5354	8.75092	1.30756	2.56417	0.0001	0.00057936
Zm00001d007831	2:240512789-240513335	Non-specific lipid-transfer protein-like protein At5g64080	14.163	35.0653	1.30792	2.0622	0.0008	0.00353513
Zm00001d031562	1:194370599-194371395	Ras-related protein RABA5c	16.5574	40.9993	1.30812	2.55057	5e-05	0.00031057
Zm00001d047917	9:145316018-145318700	ACT domain-containing protein ACR8	3.43453	8.50833	1.30877	2.14659	0.0009	0.00389168
Zm00001d032973	1:245143520-245150786	Glycerol-3-phosphate 2-O-acyltransferase 6	3.62071	8.97196	1.30915	2.1396	0.0005	0.00237556
Zm00001d021566	7:156211864-156221817	Receptor-like protein kinase At5g59670	4.50518	11.168	1.30971	3.31051	5e-05	0.00031057
Zm00001d017985	5:211401089-211405864	Pyruvate dehydrogenase E1 component subunit alpha-1, mitochondrial	47.3782	117.508	1.31046	3.9779	5e-05	0.00031057
Zm00001d003072	2:31121752-31128731	Receptor-like serine/threonine-protein kinase ALE2	18.4747	45.8268	1.31064	3.64436	5e-05	0.00031057
Zm00001d042684	3:176820831-176823217	Protein NRT1/ PTR FAMILY 5.10	3.69244	9.16061	1.31087	2.22754	0.00025	0.00130155
Zm00001d002834	2:24246749-24247433	Peroxisomal membrane protein 11-4	13.5805	33.6939	1.31095	2.29766	0.0002	0.00106912
Zm00001d011217	8:143248932-143249868	.	28.5686	70.9274	1.31191	3.11146	5e-05	0.00031057
Zm00001d014949	5:69570893-69571505	RING-H2 finger protein ATL72	53.3646	132.488	1.31191	3.14155	5e-05	0.00031057
Zm00001d027916	1:17533780-17553169	Phosphoinositide phosphatase SAC2	1.68167	4.17649	1.31239	3.06736	5e-05	0.00031057
Zm00001d038089	6:147426611-147430336	Probable folate-biopterin transporter 7	2.67645	6.65117	1.31329	2.00929	0.00145	0.00579593
Zm00001d013611	5:15352511-15353735	#N/A	9.92382	24.6638	1.31343	2.59842	5e-05	0.00031057
Zm00001d052136	4:180604676-180607029	1-aminocyclopropane-1-carboxylate oxidase 1	8.02718	19.9589	1.31406	2.52474	5e-05	0.00031057
Zm00001d044813	9:3443964-3447970	Probable fructokinase-6, chloroplastic	3.54876	8.8255	1.31436	2.68736	5e-05	0.00031057
Zm00001d029041	1:55779844-55785436	.	4.83529	12.0269	1.31459	3.5481	5e-05	0.00031057
Zm00001d020461	7:116267721-116270986	Probable methyltransferase PMT2	7.16659	17.8557	1.31702	3.78984	5e-05	0.00031057
Zm00001d021620	7:158179237-158180317	ATP synthase subunit gamma, chloroplastic	5.94447	14.8225	1.31817	2.26189	0.00035	0.00174885
Zm00001d011602	8:155605253-155612415	YTH domain-containing family protein 2	4.98849	12.4393	1.31823	3.7492	5e-05	0.00031057
Zm00001d018159	5:215718400-215720596	Alpha-amylase	14.5718	36.3365	1.31824	3.3005	5e-05	0.00031057
Zm00001d004125	2:84495886-84510274	Acetyl-CoA carboxylase 2	27.1987	67.9247	1.3204	3.78783	5e-05	0.00031057
Zm00001d028522	1:38045918-38047692	.	7.3939	18.4659	1.32046	2.78456	5e-05	0.00031057
Zm00001d051336	4:155037242-155041178	GTP-binding protein YPTM2	96.865	242.123	1.32169	4.14943	5e-05	0.00031057
Zm00001d017275	5:191467429-191471500	Phenylalanine ammonia-lyase	35.0687	87.671	1.32191	3.80263	5e-05	0.00031057
Zm00001d027373	1:3960299-3964921	Cell division control protein 2 homolog	11.0419	27.6157	1.32251	3.3586	5e-05	0.00031057
Zm00001d047841	9:143024245-143024842	17.9 kDa class I heat shock protein	120.656	301.971	1.32351	3.49645	5e-05	0.00031057
Zm00001d020345	7:108133163-108138123	Putative nucleobase-ascorbate transporter 10	2.629	6.58359	1.32436	2.3951	5e-05	0.00031057
Zm00001d051513	4:161032327-161036601	Ubiquitin carboxyl-terminal hydrolase 21	1.98007	4.96018	1.32484	2.96014	5e-05	0.00031057
Zm00001d000046	B73V4_ctg182:1051026-1054330	0	6.21812	15.5782	1.32498	2.36834	0.0002	0.00106912
Zm00001d012909	5:1879411-1882859	AB hydrolase superfamily protein YfhM	26.2617	65.7967	1.32505	3.0767	5e-05	0.00031057
Zm00001d019459	7:34704443-34707004	#N/A	12.187	30.5356	1.32515	2.66046	5e-05	0.00031057
Zm00001d013243	5:6938132-6943851	Cyclic nucleotide-gated ion channel 2	3.54319	8.87931	1.3254	2.71105	5e-05	0.00031057
Zm00001d038623	6:161118604-161123856	Secretory carrier-associated membrane protein 3	41.2665	103.423	1.32551	4.31556	5e-05	0.00031057
Zm00001d047937	9:145720386-145722351	.	8.92675	22.3766	1.32578	2.9258	5e-05	0.00031057
Zm00001d047128	9:119414806-119418522	UDP-N-acetylmuramoyl-L-alanyl-D-glutamate--2,6-diaminopimelate ligase	2.30856	5.78891	1.3263	2.90788	5e-05	0.00031057
Zm00001d007175	2:223829102-223831634	Protein ENHANCED DISEASE RESISTANCE 4	5.84249	14.6575	1.32699	3.04248	5e-05	0.00031057
Zm00001d006621	2:212770258-212774000	Calcium-dependent protein kinase 8	8.77881	22.0279	1.32724	3.73044	5e-05	0.00031057
Zm00001d052322	4:187094617-187095187	PRA1 family protein B4	10.6509	26.7321	1.32759	1.95751	0.00185	0.00713834
Zm00001d022616	7:181177254-181180361	Acyl carrier protein 3, chloroplastic	48.0331	120.564	1.32769	3.89347	5e-05	0.00031057
Zm00001d016736	5:174721845-174726025	2-Cys peroxiredoxin BAS1, chloroplastic	6.86679	17.2419	1.32821	2.68294	5e-05	0.00031057
Zm00001d053751	4:240442252-240456485	.	1.44302	3.62354	1.32831	2.25198	0.0005	0.00237556
Zm00001d002688	2:19320227-19329846	Mitogen-activated protein kinase kinase kinase YODA	1.3354	3.3572	1.32999	1.90339	0.0003	0.0015276
Zm00001d013030	5:3472229-3476498	Calcium-dependent protein kinase 8	3.32516	8.36466	1.33088	2.52122	5e-05	0.00031057
Zm00001d049910	4:52073478-52076203	Protein DETOXIFICATION 34	3.29701	8.29394	1.3309	2.40961	5e-05	0.00031057
Zm00001d010236	8:105522083-105524781	Cytochrome c	51.0198	128.378	1.33127	3.80166	5e-05	0.00031057
Zm00001d007027	2:220378884-220379460	E3 ubiquitin-protein ligase RING1-like	48.4053	121.856	1.33194	3.11211	5e-05	0.00031057
Zm00001d014613	5:55643858-55644731	Xyloglucan endotransglucosylase/hydrolase protein 22	130.569	328.813	1.33246	4.07938	5e-05	0.00031057
Zm00001d031805	1:202330756-202332503	2-hydroxyisoflavanone dehydratase	18.8845	47.5599	1.33254	2.63434	5e-05	0.00031057
Zm00001d011756	8:160818521-160825421	Protein VTE6, chloroplastic	4.39857	11.0844	1.33343	2.6686	0.00015	0.000830091
Zm00001d010198	8:103711080-103714624	Probable magnesium transporter NIPA7	7.07538	17.832	1.33359	3.42234	5e-05	0.00031057
Zm00001d031179	1:181314459-181317451	Ras-related protein RABF2a	16.7502	42.2209	1.33378	3.42485	5e-05	0.00031057
Zm00001d025381	10:116549726-116550765	0	28.3294	71.4083	1.33379	2.90816	5e-05	0.00031057
Zm00001d053782	4:240980103-240984661	Cytochrome P450 97B2, chloroplastic	1.51602	3.82169	1.33393	2.32196	0.00025	0.00130155
Zm00001d004624	2:122503562-122505289	Probable O-methyltransferase 2	2.60416	6.56657	1.33432	2.37636	0.00025	0.00130155
Zm00001d019504	7:38019355-38020734	.	9.97846	25.1741	1.33505	2.74594	5e-05	0.00031057
Zm00001d049239	4:22371773-22374938	Adenosylhomocysteinase	219.268	554.044	1.3373	3.571	5e-05	0.00031057
Zm00001d003524	2:46658255-46660165	Non-functional NADPH-dependent codeinone reductase 2	8.65916	21.9014	1.33872	2.66908	5e-05	0.00031057
Zm00001d026068	10:137510087-137512421	Subtilisin-like protease SBT1.3	3.87997	9.81922	1.33956	2.47651	0.0002	0.00106912
Zm00001d012578	8:176853050-176855156	DNA-3-methyladenine glycosylase 1	3.37798	8.5491	1.33961	2.18521	0.00025	0.00130155
Zm00001d049228	4:21757595-21759238	.	6.97431	17.6639	1.34068	2.40493	0.0002	0.00106912
Zm00001d052200	4:183162056-183165340	F-box protein FBW2	8.92908	22.6402	1.34231	3.06513	5e-05	0.00031057
Zm00001d012234	8:170600287-170602763	Probable beta-1,3-galactosyltransferase 8	12.3247	31.2549	1.34253	3.16549	5e-05	0.00031057
Zm00001d019593	7:45246087-45247213	Probable carbohydrate esterase At4g34215	23.1721	58.7679	1.34264	3.06506	5e-05	0.00031057
Zm00001d010220	8:104634541-104636543	40S ribosomal protein S12	25.0887	63.6344	1.34277	3.15116	5e-05	0.00031057
Zm00001d012629	8:177496008-177501834	#N/A	1.01563	2.57685	1.34324	1.80935	0.00045	0.00217427
Zm00001d046262	9:77157096-77159734	Cytosolic isocitrate dehydrogenase [NADP]	1.96813	4.99469	1.34357	2.09125	0.00085	0.00371002
Zm00001d008779	8:19717268-19718855	Leucine-rich repeat extensin-like protein 4	3.53543	8.97296	1.3437	2.04246	0.0012	0.00494945
Zm00001d002261	2:9094316-9098515	Peroxisomal (S)-2-hydroxy-acid oxidase GLO3	12.3147	31.2694	1.34437	2.89701	5e-05	0.00031057
Zm00001d044618	3:233470825-233476348	Protein NUCLEAR FUSION DEFECTIVE 4	5.2249	13.2684	1.34452	2.50173	0.0001	0.00057936
Zm00001d049234	4:22022727-22027004	Serine hydroxymethyltransferase 4	122.184	310.353	1.34486	4.04832	5e-05	0.00031057
Zm00001d023912	10:27881680-27885933	.	2.02157	5.13828	1.34581	2.91154	5e-05	0.00031057
Zm00001d012292	8:172024416-172027229	Glucan endo-1,3-beta-glucosidase 14	14.5081	36.8832	1.3461	2.96811	5e-05	0.00031057
Zm00001d008244	8:2452375-2459944	3-isopropylmalate dehydrogenase, chloroplastic	18.1642	46.2102	1.34711	4.07804	5e-05	0.00031057
Zm00001d042506	3:170090736-170094686	Formin-like protein 1	18.5655	47.2392	1.34736	3.85381	5e-05	0.00031057
Zm00001d045311	9:18788725-18792268	.	3.25876	8.30175	1.34909	2.88681	5e-05	0.00031057
Zm00001d034689	1:300057444-300062985	Probable serine/threonine-protein kinase At5g41260	1.68191	4.28647	1.34969	2.41048	5e-05	0.00031057
Zm00001d028408	1:33789049-33790182	26.7 kDa heat shock protein, chloroplastic	125.508	320.229	1.35133	3.54573	5e-05	0.00031057
Zm00001d008214	8:1454271-1456128	Rhomboid-like protein 14, mitochondrial	8.01949	20.4841	1.35292	3.05828	5e-05	0.00031057
Zm00001d032652	1:233132458-233138366	Uncharacterized protein YpgQ	29.1371	74.4507	1.35343	4.14906	5e-05	0.00031057
Zm00001d053715	4:239764266-239765769	Cinnamate beta-D-glucosyltransferase	22.6007	57.755	1.35358	3.35146	5e-05	0.00031057
Zm00001d040672	3:57179172-57201044	Serine/arginine-rich-splicing factor SR34	13.5847	34.7259	1.35403	2.93803	5e-05	0.00031057
Zm00001d041912	3:143139068-143145913	Protein FAM135B	1.80148	4.60851	1.35512	3.04399	5e-05	0.00031057
Zm00001d005789	2:188710661-188711219	Histone H2B.3	22.8867	58.567	1.35558	2.74286	5e-05	0.00031057
Zm00001d028102	1:22995809-23008536	Mitochondrial outer membrane protein porin 5	20.9806	53.6992	1.35585	3.80405	5e-05	0.00031057
Zm00001d033749	1:272717185-272719728	Pentatricopeptide repeat-containing protein At4g01570	1.39019	3.56012	1.35665	2.39122	0.0001	0.00057936
Zm00001d015777	5:118463713-118464650	23.6 kDa heat shock protein, mitochondrial	16.4909	42.248	1.35721	2.72845	5e-05	0.00031057
Zm00001d026139	10:139500503-139503230	Calcium-dependent protein kinase 12	2.91504	7.4771	1.35896	2.60064	0.0001	0.00057936
Zm00001d036529	6:91275078-91276099	#N/A	4.40216	11.2952	1.35943	2.61807	0.0001	0.00057936
Zm00001d017427	5:195764466-195767455	Iron-phytosiderophore transporter YSL15	56.5574	145.189	1.36014	4.12922	5e-05	0.00031057
Zm00001d053367	4:227757286-227766289	Arabinogalactan peptide 16	7.55471	19.3938	1.36014	2.75869	5e-05	0.00031057
Zm00001d000034	B73V4_ctg182:378276-384064	0	2.09269	5.38388	1.36329	3.56883	5e-05	0.00031057
Zm00001d015839	5:124936313-124940355	Chaperone protein dnaJ 6	5.76731	14.8384	1.36336	3.11811	5e-05	0.00031057
Zm00001d038319	6:154339041-154352874	Protein LIKE COV 2	2.43393	6.26215	1.36337	2.3133	5e-05	0.00031057
Zm00001d012240	8:170777808-170781884	Uncharacterized protein slp1	2.16193	5.5624	1.36339	2.95913	5e-05	0.00031057
Zm00001d007764	2:239261100-239265459	Hydroxyproline O-galactosyltransferase GALT6	2.70559	6.96931	1.36507	2.92994	5e-05	0.00031057
Zm00001d043805	3:210580503-210592391	Zinc finger protein BRUTUS	2.6251	6.7626	1.3652	3.58016	5e-05	0.00031057
Zm00001d039131	6:170732906-170739381	Glucose-1-phosphate adenylyltransferase large subunit, chloroplastic/amyloplastic	29.4613	75.9028	1.36533	4.08039	5e-05	0.00031057
Zm00001d034655	1:298994998-298998450	Protein phosphatase 2C 35	5.19484	13.3849	1.36545	2.98451	5e-05	0.00031057
Zm00001d013245	5:6952559-6954002	UDP-glucose 6-dehydrogenase 5	23.8212	61.3814	1.36556	3.79871	5e-05	0.00031057
Zm00001d029478	1:72423917-72427230	MOB kinase activator-like 1A	33.9848	87.5768	1.36566	4.06104	5e-05	0.00031057
Zm00001d044445	3:228253461-228257016	V-type proton ATPase subunit c''2	48.0884	123.977	1.36631	4.00096	5e-05	0.00031057
Zm00001d022619	7:181212862-181216786	Protein MCM10 homolog	3.34746	8.63152	1.36655	2.68041	5e-05	0.00031057
Zm00001d037781	6:137503064-137509357	DNA replication licensing factor MCM6	3.39322	8.75037	1.36669	2.57871	5e-05	0.00031057
Zm00001d043137	3:189988086-189993149	Proteasome subunit alpha type-3	9.24846	23.8572	1.36714	3.40906	5e-05	0.00031057
Zm00001d050184	4:71447977-71455940	Probable E3 ubiquitin-protein ligase XBOS35	3.74986	9.67454	1.36736	2.80696	5e-05	0.00031057
Zm00001d046455	9:90721226-90723093	Acyl transferase 7	9.08447	23.4591	1.36867	2.83395	5e-05	0.00031057
Zm00001d032045	1:210458384-210460255	Probable 6-phosphogluconolactonase 4, chloroplastic	2.78653	7.19773	1.36907	2.17879	0.0006	0.00276399
Zm00001d026337	10:143786831-143796162	Soluble starch synthase 3, chloroplastic/amyloplastic	2.3539	6.08395	1.36995	3.63581	5e-05	0.00031057
Zm00001d044246	3:222967857-222968792	Histone H2A	309.961	801.171	1.37003	4.2156	5e-05	0.00031057
Zm00001d009693	8:76211166-76215916	Protein REDUCED WALL ACETYLATION 3	3.22161	8.33097	1.3707	3.29806	5e-05	0.00031057
Zm00001d008153	8:174305935-174306620	#N/A	6.49379	16.7964	1.37102	2.16266	0.00045	0.00217427
Zm00001d004075	2:80531431-80537038	Probable inactive purple acid phosphatase 27	2.10219	5.43934	1.37154	2.38027	0.0001	0.00057936
Zm00001d006357	2:205658134-205671973	Protein GRIP	2.05901	5.33679	1.37403	3.38215	5e-05	0.00031057
Zm00001d043195	3:191223560-191226510	Metacaspase-5	10.512	27.2647	1.375	3.6072	5e-05	0.00031057
Zm00001d031267	1:184397569-184400001	Probable nitronate monooxygenase	12.4737	32.3531	1.37501	3.63439	5e-05	0.00031057
Zm00001d007952	2:243982041-243983760	Peroxidase 51	2.41367	6.26353	1.37575	1.89033	0.00195	0.00746888
Zm00001d003924	2:68550653-68555257	Glycerophosphodiester phosphodiesterase GDPD1, chloroplastic	3.30633	8.58712	1.37694	2.18926	0.00045	0.00217427
Zm00001d007366	2:229771463-229779665	Haloacid dehalogenase-like hydrolase domain-containing protein At3g48420	1.64965	4.28482	1.37707	2.07886	0.00105	0.00442562
Zm00001d037636	6:132563361-132570425	Probable cellulose synthase A catalytic subunit 1 [UDP-forming]	14.6209	37.9806	1.37723	4.47706	5e-05	0.00031057
Zm00001d006065	2:197131271-197133841	Transcription factor bHLH49	3.55554	9.24064	1.37793	2.19814	0.00055	0.00257305
Zm00001d013223	5:6720507-6727876	Aspartate-semialdehyde dehydrogenase	12.0828	31.4069	1.37813	3.53243	5e-05	0.00031057
Zm00001d021706	7:160893539-160894808	Histone H2A.4	96.9278	251.994	1.3784	4.09156	5e-05	0.00031057
Zm00001d034865	1:304197046-304201731	Pentatricopeptide repeat-containing protein At2g35030, mitochondrial	1.23173	3.20278	1.37864	2.14324	0.00025	0.00130155
Zm00001d013659	5:16553268-16560294	Protein DYAD	2.97037	7.72373	1.37865	2.91233	5e-05	0.00031057
Zm00001d025234	10:110338607-110344763	Probable DNA primase large subunit	2.24032	5.828	1.3793	1.78025	0.00105	0.00442562
Zm00001d001947	2:3404970-3408793	.	3.6775	9.56961	1.37974	2.95971	5e-05	0.00031057
Zm00001d053541	4:233438442-233443072	SH3 domain-containing protein PJ696.02	4.47885	11.6661	1.38112	3.31222	5e-05	0.00031057
Zm00001d051502	4:160498470-160504465	Calcium-dependent protein kinase 5	1.90959	4.97506	1.38145	1.71144	0.00215	0.00809985
Zm00001d028930	1:51839503-51841800	Transcription factor MYB108	2.90148	7.55989	1.38158	2.30754	0.0002	0.00106912
Zm00001d051995	4:176048086-176049833	Proliferating cell nuclear antigen	18.2115	47.4607	1.38188	3.65146	5e-05	0.00031057
Zm00001d033787	1:273742639-273745271	UV-B-induced protein At3g17800, chloroplastic	10.966	28.594	1.38268	3.43633	5e-05	0.00031057
Zm00001d018399	5:219982190-219988382	#N/A	10.919	28.4768	1.38295	3.86248	5e-05	0.00031057
Zm00001d036541	6:91506005-91510877	Oryzain alpha chain	7.09831	18.5128	1.38298	2.95603	5e-05	0.00031057
Zm00001d022491	7:178668198-178683112	DNA polymerase zeta catalytic subunit	1.58669	4.14185	1.38426	3.7533	5e-05	0.00031057
Zm00001d020954	7:137626104-137626968	Splicing factor U2af small subunit A	34.7648	90.7882	1.38488	3.52837	5e-05	0.00031057
Zm00001d041839	3:140023602-140029825	Dihydrolipoyllysine-residue acetyltransferase component 5 of pyruvate dehydrogenase complex, chloroplastic	14.5466	38.0329	1.38656	3.95184	5e-05	0.00031057
Zm00001d033180	1:253162490-253166753	Cytochrome P450 85A1	7.14443	18.6812	1.38669	3.28085	5e-05	0.00031057
Zm00001d006502	2:210092165-210095107	#N/A	46.9387	122.756	1.38694	3.34036	5e-05	0.00031057
Zm00001d005498	2:175999838-176006292	Guanosine nucleotide diphosphate dissociation inhibitor 2	3.82058	9.99339	1.38718	3.33216	5e-05	0.00031057
Zm00001d025807	10:130123664-130125293	UPF0481 protein At3g47200	5.2488	13.7291	1.38718	2.44249	0.00025	0.00130155
Zm00001d044455	3:228435562-228439044	.	3.17756	8.31446	1.38771	2.21526	0.00075	0.00334812
Zm00001d049313	4:25972811-26004018	LINE-1 retrotransposable element ORF2 protein	1.02835	2.69223	1.38847	2.52515	5e-05	0.00031057
Zm00001d027527	1:7457234-7459538	40S ribosomal protein SA	27.0567	70.8361	1.3885	3.99152	5e-05	0.00031057
Zm00001d053622	4:236999462-237006338	.	8.36299	21.9221	1.3903	2.5956	0.00015	0.000830091
Zm00001d036439	6:88560353-88561488	Arogenate dehydrogenase 2, chloroplastic	10.7577	28.2136	1.39102	2.63995	5e-05	0.00031057
Zm00001d004171	2:88958975-88963643	Transketolase, chloroplastic	1.98337	5.20176	1.39105	3.30373	5e-05	0.00031057
Zm00001d000099	B73V4_ctg91:203933-209968	0	9.74424	25.557	1.3911	4.01532	5e-05	0.00031057
Zm00001d016768	5:175327306-175331417	Cytosolic invertase 1	4.74042	12.4373	1.39159	3.39149	5e-05	0.00031057
Zm00001d017423	5:195641812-195645583	Origin of replication complex subunit 2	1.5137	3.97211	1.39182	2.2231	0.0007	0.00315458
Zm00001d036571	6:93093254-93103441	Heat shock 70 kDa protein 16	7.77566	20.4085	1.39213	4.001	5e-05	0.00031057
Zm00001d032468	1:227650950-227651577	Cytochrome P450 84A1	6.59795	17.3202	1.39236	1.91535	0.0022	0.00825909
Zm00001d040340	3:38778972-38786131	Probable vacuolar amino acid transporter YPQ3	1.90511	5.00203	1.39264	2.71114	0.0001	0.00057936
Zm00001d022204	7:172765026-172766545	#N/A	3.17766	8.3538	1.39447	2.09482	0.0007	0.00315458
Zm00001d028557	1:39085727-39086204	0	14.2203	37.3841	1.39447	1.94986	0.0017	0.00664599
Zm00001d032703	1:235316063-235322119	Probable methyltransferase PMT8	10.5462	27.7358	1.39502	2.10642	0.0004	0.00196604
Zm00001d015927	5:131794318-131803160	L-gulonolactone oxidase 3	2.92445	7.69175	1.39515	2.30713	0.0002	0.00106912
Zm00001d043524	3:202714091-202717654	Glucan endo-1,3-beta-glucosidase 13	24.8421	65.3494	1.39539	3.87159	5e-05	0.00031057
Zm00001d010202	8:103899794-103902224	FT-interacting protein 1	3.37644	8.88662	1.39613	2.84788	5e-05	0.00031057
Zm00001d012837	5:975109-975562	Probable histone H2A.1	126.346	332.733	1.39698	3.59158	5e-05	0.00031057
[truncated: 1,117 more rows]
